# Supplementary material for: Elucidating the fundamental fibrotic processes driving abdominal adhesion formation
Source: PubMed Central journal article supplement (PMC7426428; doi:10.1038/s41467-020-17883-1), 2020-08-13
Supplement: 41467_2020_17883_MOESM3_ESM.pdf [file 41467_2020_17883_MOESM3_ESM.pdf]

**Supplementary Dataset 1: Genes differentially expressed between mouse fibroblasts isolated from abdominal adhesions ('Adhesions') versus sham-surgery controls ('Sham') by DESeq2**

This workbook contains one sheet:

**Sheet 1:** Table of differentially expressed genes between mouse fibroblasts isolated from abdominal adhesions (  $n = 4$  samples) and sham controls (  $n = 4$  samples) after performing lfcShrink using Approximate Posterior Estimation for GLM (apeglm) in DESeq2. A significance threshold of  $P_{adjusted} < 0.1$  was used to filter genes. Positive log2FoldChange values correspond to genes significantly enriched in abdominal adhesions compared to sham controls.

| GeneID    | baseMean  | log2FoldChange | lfcSE | pvalue   | padj     |
|-----------|-----------|----------------|-------|----------|----------|
| Spp1      | 1096.48   | 5.83           | 0.48  | 6.35E-27 | 2.26E-23 |
| Ms4a6d    | 180.65    | 4.97           | 0.79  | 4.59E-11 | 2.11E-08 |
| Col24a1   | 220.05    | 4.65           | 0.46  | 3.08E-21 | 6.28E-18 |
| Trem2     | 63.84     | 4.12           | 0.79  | 1.21E-07 | 2.50E-05 |
| Cnn1      | 144.00    | 3.85           | 0.56  | 2.20E-11 | 1.14E-08 |
| Scx       | 232.95    | 3.83           | 0.76  | 3.93E-07 | 6.37E-05 |
| Cxcl5     | 674.03    | 3.76           | 0.57  | 2.33E-10 | 9.24E-08 |
| Ptn       | 7790.27   | 3.59           | 0.27  | 2.03E-36 | 2.89E-32 |
| Clla2a    | 730.83    | 3.47           | 0.56  | 1.49E-09 | 4.72E-07 |
| Ccl3      | 114.65    | 3.38           | 0.80  | 2.83E-06 | 3.11E-04 |
| Hp        | 2166.06   | 3.20           | 0.35  | 5.06E-18 | 7.21E-15 |
| Gpr176    | 367.92    | 3.16           | 0.35  | 6.21E-19 | 9.83E-16 |
| Saa3      | 4844.89   | 2.97           | 0.80  | 3.15E-05 | 2.24E-03 |
| Dlk1      | 2617.64   | 2.97           | 0.38  | 6.59E-16 | 7.22E-13 |
| Zfp185    | 751.75    | 2.92           | 0.37  | 2.12E-14 | 1.89E-11 |
| Slc7a2    | 288.05    | 2.91           | 0.74  | 1.56E-05 | 1.34E-03 |
| Glipr1    | 221.19    | 2.81           | 0.42  | 2.25E-11 | 1.14E-08 |
| Tagln     | 830.36    | 2.76           | 0.43  | 6.27E-11 | 2.79E-08 |
| Cbn1      | 166.28    | 2.75           | 0.48  | 3.15E-09 | 9.76E-07 |
| Cttrc1    | 9438.80   | 2.74           | 0.28  | 3.71E-23 | 1.06E-19 |
| Wisp1     | 1477.93   | 2.69           | 0.48  | 8.89E-09 | 2.35E-06 |
| Adam12    | 2962.80   | 2.61           | 0.45  | 8.66E-10 | 2.94E-07 |
| C1qc      | 1013.80   | 2.56           | 0.46  | 6.55E-09 | 1.82E-06 |
| Csf1r     | 1007.45   | 2.47           | 0.38  | 3.45E-11 | 1.64E-08 |
| Ms4a7     | 227.98    | 2.43           | 0.53  | 8.62E-07 | 1.18E-04 |
| Marcks1   | 2625.82   | 2.36           | 0.20  | 2.25E-32 | 1.60E-28 |
| Pirb      | 243.05    | 2.33           | 0.70  | 7.00E-05 | 4.25E-03 |
| C1qb      | 1360.11   | 2.30           | 0.49  | 3.37E-07 | 5.52E-05 |
| Acta2     | 2575.47   | 2.28           | 0.44  | 2.19E-08 | 5.11E-06 |
| Asic2     | 175.67    | 2.25           | 0.68  | 6.37E-05 | 3.94E-03 |
| Fcgr3     | 425.60    | 2.22           | 0.54  | 2.66E-06 | 2.94E-04 |
| Fbn2      | 1239.21   | 2.20           | 0.60  | 1.80E-05 | 1.49E-03 |
| Tnc       | 7481.43   | 2.17           | 0.19  | 1.72E-29 | 8.18E-26 |
| Adamts7   | 341.49    | 2.15           | 0.52  | 1.73E-06 | 2.07E-04 |
| Cybb      | 379.65    | 2.14           | 0.54  | 3.25E-06 | 3.46E-04 |
| Cdh11     | 4922.04   | 2.10           | 0.29  | 7.74E-14 | 6.48E-11 |
| P4ha3     | 1068.74   | 2.09           | 0.52  | 3.66E-06 | 3.81E-04 |
| Olfm2     | 242.47    | 2.09           | 0.55  | 1.07E-05 | 9.86E-04 |
| Mdk       | 3235.70   | 2.08           | 0.27  | 5.02E-15 | 5.11E-12 |
| Ein       | 102601.50 | 2.06           | 0.25  | 2.92E-17 | 3.78E-14 |
| Bhlhe22   | 174.06    | 2.02           | 0.67  | 1.68E-04 | 8.08E-03 |
| Tyropb    | 257.29    | 2.00           | 0.56  | 2.48E-05 | 1.86E-03 |
| Rgs4      | 572.45    | 1.98           | 0.59  | 5.81E-05 | 3.69E-03 |
| Serpinc6b | 147.96    | 1.98           | 0.52  | 1.27E-05 | 1.14E-03 |
| Comp      | 185.85    | 1.97           | 0.71  | 2.24E-04 | 9.90E-03 |
| Tnmd      | 1449.73   | 1.95           | 0.33  | 7.10E-10 | 2.47E-07 |
| C1qa      | 662.14    | 1.93           | 0.56  | 2.77E-05 | 2.03E-03 |
| Sult1e1   | 1383.88   | 1.91           | 0.56  | 2.99E-05 | 2.15E-03 |
| Runx1     | 883.38    | 1.85           | 0.55  | 6.03E-05 | 3.81E-03 |
| Uck2      | 571.16    | 1.84           | 0.36  | 4.22E-08 | 9.55E-06 |
| Capn6     | 3255.31   | 1.80           | 0.20  | 5.09E-20 | 9.06E-17 |
| Cyp7b1    | 1062.92   | 1.78           | 0.46  | 6.84E-06 | 6.81E-04 |
| Slc16a3   | 520.27    | 1.77           | 0.48  | 1.40E-05 | 1.23E-03 |
| Pdlim3    | 729.63    | 1.76           | 0.41  | 1.82E-06 | 2.12E-04 |
| Lilrb4a   | 298.37    | 1.74           | 0.56  | 1.22E-04 | 6.37E-03 |
| Nf5dc2    | 1609.76   | 1.73           | 0.26  | 4.97E-12 | 3.22E-09 |
| Ctss      | 1502.33   | 1.72           | 0.29  | 6.78E-10 | 2.47E-07 |
| Laptm5    | 730.58    | 1.72           | 0.59  | 1.60E-04 | 7.82E-03 |
| Cd83      | 546.46    | 1.71           | 0.42  | 2.47E-06 | 2.80E-04 |
| Ly6h      | 255.62    | 1.69           | 0.48  | 2.14E-05 | 1.69E-03 |
| Apoe      | 31964.11  | 1.66           | 0.27  | 9.02E-11 | 3.78E-08 |
| Pf4       | 153.52    | 1.64           | 0.69  | 6.47E-04 | 2.24E-02 |
| Anh       | 409.19    | 1.61           | 0.53  | 1.45E-04 | 7.25E-03 |
| H2-Aa     | 1966.60   | 1.59           | 0.42  | 1.07E-05 | 9.86E-04 |
| Fcgr1g    | 412.94    | 1.58           | 0.55  | 1.61E-04 | 7.82E-03 |
| Myo7a     | 929.24    | 1.58           | 0.35  | 4.20E-07 | 6.50E-05 |
| Timp1     | 2929.46   | 1.55           | 0.27  | 1.19E-09 | 3.95E-07 |
| Kcnma1    | 514.21    | 1.55           | 0.39  | 4.45E-06 | 4.56E-04 |
| Arxes2    | 317.18    | 1.54           | 0.41  | 1.01E-05 | 9.36E-04 |
| Syndig1   | 677.49    | 1.53           | 0.43  | 2.27E-05 | 1.72E-03 |
| H2-Ab1    | 3200.32   | 1.51           | 0.36  | 1.78E-06 | 2.10E-04 |
| Rgs16     | 933.09    | 1.50           | 0.50  | 1.09E-04 | 5.88E-03 |
| C1s2      | 202.34    | 1.47           | 0.74  | 1.36E-03 | 3.77E-02 |
| Gata6     | 1343.98   | 1.46           | 0.35  | 2.48E-06 | 2.80E-04 |
| C1qtmf3   | 22984.66  | 1.45           | 0.25  | 3.40E-10 | 1.31E-07 |
| Cd68      | 313.41    | 1.45           | 0.79  | 1.85E-03 | 4.59E-02 |
| Sdc1      | 3911.65   | 1.43           | 0.23  | 2.68E-11 | 1.32E-08 |
| Atf4c     | 148.00    | 1.42           | 0.87  | 2.52E-03 | 5.67E-02 |
| Sphk1     | 888.46    | 1.41           | 0.22  | 8.07E-12 | 4.93E-09 |
| Lbh       | 542.08    | 1.41           | 0.44  | 7.76E-05 | 4.61E-03 |
| 9-Sep     | 1536.05   | 1.39           | 0.26  | 6.61E-09 | 1.82E-06 |
| Csdc2     | 585.06    | 1.39           | 0.30  | 2.75E-07 | 4.84E-05 |
| Pld4      | 264.97    | 1.37           | 0.63  | 9.97E-04 | 3.08E-02 |
| Cdk1      | 240.66    | 1.35           | 0.60  | 9.24E-04 | 2.94E-02 |
| Cdkn2b    | 385.27    | 1.35           | 0.41  | 5.44E-05 | 3.51E-03 |
| Ctlu      | 9093.48   | 1.35           | 0.28  | 9.74E-08 | 2.04E-05 |
| Pdgfa     | 622.98    | 1.35           | 0.29  | 3.31E-07 | 5.49E-05 |
| Fndc5     | 518.41    | 1.34           | 0.28  | 8.28E-08 | 1.79E-05 |
| Gpr39     | 244.03    | 1.34           | 0.69  | 1.61E-03 | 4.19E-02 |
| Plxna4    | 259.78    | 1.34           | 0.64  | 1.30E-03 | 3.67E-02 |
| Wnt4      | 699.90    | 1.34           | 0.59  | 9.02E-04 | 2.90E-02 |
| Nectin2   | 1333.91   | 1.33           | 0.31  | 1.10E-06 | 1.44E-04 |
| Arhgd1b   | 893.82    | 1.30           | 0.30  | 6.55E-07 | 9.42E-05 |
| Fcgr2b    | 374.28    | 1.30           | 0.64  | 1.28E-03 | 3.64E-02 |
| H2-Eb1    | 1784.21   | 1.30           | 0.30  | 8.19E-07 | 1.13E-04 |

|          |          |      |      |          |          |
|----------|----------|------|------|----------|----------|
| Cd74     | 9314.10  | 1.30 | 0.36 | 1.91E-05 | 1.55E-03 |
| Gami3    | 752.13   | 1.30 | 0.27 | 1.62E-07 | 3.16E-05 |
| Rhod     | 456.58   | 1.28 | 0.29 | 7.58E-07 | 1.08E-04 |
| Fscn1    | 3625.07  | 1.26 | 0.28 | 3.30E-07 | 5.49E-05 |
| Egfl6    | 522.18   | 1.26 | 0.30 | 1.67E-06 | 2.04E-04 |
| Mest     | 5380.45  | 1.25 | 0.40 | 7.60E-05 | 4.55E-03 |
| Car3     | 1255.92  | 1.25 | 0.55 | 9.39E-04 | 2.95E-02 |
| H2-DMb1  | 400.20   | 1.25 | 0.57 | 9.95E-04 | 3.08E-02 |
| Lrmda    | 217.07   | 1.23 | 0.71 | 2.13E-03 | 5.03E-02 |
| Npl      | 247.96   | 1.22 | 0.85 | 3.71E-03 | 7.39E-02 |
| Schip1   | 338.27   | 1.22 | 0.35 | 2.50E-05 | 1.86E-03 |
| Akap2    | 516.78   | 1.21 | 0.38 | 6.41E-05 | 3.96E-03 |
| Nkd1     | 1033.74  | 1.21 | 0.29 | 1.43E-06 | 1.81E-04 |
| Ccnb2    | 404.89   | 1.21 | 0.43 | 2.27E-04 | 9.97E-03 |
| Cd19     | 284.86   | 1.21 | 0.43 | 2.18E-04 | 9.76E-03 |
| Lhfp2    | 3193.67  | 1.20 | 0.26 | 1.99E-07 | 3.72E-05 |
| Fabp5    | 510.58   | 1.19 | 0.27 | 4.41E-07 | 6.76E-05 |
| Tspan11  | 1293.66  | 1.18 | 0.23 | 1.41E-08 | 3.51E-06 |
| Mfap2    | 23491.13 | 1.18 | 0.13 | 8.15E-22 | 1.94E-18 |
| Cxcl2    | 1147.46  | 1.18 | 0.87 | 3.53E-03 | 7.15E-02 |
| Plekho1  | 317.86   | 1.16 | 0.52 | 9.69E-04 | 3.02E-02 |
| Tpm2     | 2933.15  | 1.16 | 0.17 | 8.29E-13 | 5.91E-10 |
| Pla2g7   | 587.20   | 1.15 | 0.41 | 2.32E-04 | 1.01E-02 |
| Tmem98   | 2341.71  | 1.14 | 0.31 | 1.66E-05 | 1.40E-03 |
| Gucy1a1  | 1861.35  | 1.14 | 0.24 | 1.38E-07 | 2.76E-05 |
| Sox4     | 3960.08  | 1.13 | 0.20 | 1.23E-09 | 3.97E-07 |
| Ednra    | 1081.65  | 1.13 | 0.37 | 1.17E-04 | 6.19E-03 |
| F2r      | 5440.61  | 1.13 | 0.24 | 2.09E-07 | 3.87E-05 |
| Shisa4   | 794.77   | 1.12 | 0.31 | 1.63E-05 | 1.38E-03 |
| Adams3   | 376.12   | 1.12 | 0.54 | 1.36E-03 | 3.77E-02 |
| Nrep     | 9139.60  | 1.11 | 0.19 | 7.12E-10 | 2.47E-07 |
| Gpc1     | 1388.40  | 1.11 | 0.35 | 8.03E-05 | 4.71E-03 |
| Hvcn1    | 2141.02  | 1.11 | 0.17 | 1.68E-11 | 9.59E-09 |
| Fhl2     | 1514.98  | 1.10 | 0.30 | 1.19E-05 | 1.08E-03 |
| Mrv1     | 949.52   | 1.08 | 0.63 | 2.37E-03 | 5.44E-02 |
| Actn1    | 515.22   | 1.07 | 0.49 | 1.12E-03 | 3.29E-02 |
| Acp5     | 1299.21  | 1.07 | 0.33 | 6.48E-05 | 3.98E-03 |
| Piezo2   | 816.86   | 1.07 | 0.38 | 2.24E-04 | 9.90E-03 |
| Rexo5    | 261.21   | 1.06 | 0.52 | 1.42E-03 | 3.87E-02 |
| Slic27a3 | 871.91   | 1.06 | 0.33 | 8.37E-05 | 4.83E-03 |
| Rbp1     | 6923.43  | 1.05 | 0.20 | 6.66E-09 | 1.82E-06 |
| Cdh2     | 170.34   | 1.04 | 0.67 | 3.25E-03 | 6.77E-02 |
| Stmn1    | 1412.11  | 1.03 | 0.29 | 2.11E-05 | 1.68E-03 |
| Kcng4    | 308.36   | 1.03 | 0.34 | 1.20E-04 | 6.31E-03 |
| Trf      | 11655.15 | 1.03 | 0.33 | 9.26E-05 | 5.24E-03 |
| Sfrp1    | 18709.76 | 1.03 | 0.20 | 5.06E-08 | 1.13E-05 |
| Palld    | 3978.60  | 1.02 | 0.15 | 1.58E-13 | 1.25E-10 |
| Cxcl9    | 441.32   | 1.02 | 0.34 | 1.27E-04 | 6.62E-03 |
| Depdc7   | 179.46   | 1.02 | 0.96 | 5.21E-03 | 9.18E-02 |
| Unc119   | 409.29   | 1.01 | 0.44 | 9.26E-04 | 2.94E-02 |
| Nxn      | 418.20   | 1.01 | 0.37 | 2.76E-04 | 1.16E-02 |
| Art4     | 317.43   | 1.01 | 0.68 | 3.73E-03 | 7.41E-02 |
| Cpz      | 4518.17  | 1.00 | 0.32 | 1.07E-04 | 5.81E-03 |
| Cdc20    | 369.64   | 1.00 | 0.61 | 3.02E-03 | 6.41E-02 |
| Wt1      | 888.64   | 0.99 | 0.47 | 1.28E-03 | 3.64E-02 |
| Sfrp2    | 25180.41 | 0.98 | 0.19 | 1.27E-08 | 3.22E-06 |
| Ctsc     | 6845.39  | 0.98 | 0.25 | 3.31E-06 | 3.49E-04 |
| S1pr3    | 2298.17  | 0.98 | 0.54 | 2.36E-03 | 5.43E-02 |
| Dkk3     | 8029.00  | 0.97 | 0.16 | 1.72E-10 | 7.02E-08 |
| Id4      | 2503.65  | 0.97 | 0.32 | 1.15E-04 | 6.14E-03 |
| Mgp      | 22617.91 | 0.95 | 0.20 | 2.14E-07 | 3.90E-05 |
| Gm2564   | 483.96   | 0.95 | 0.42 | 9.62E-04 | 3.00E-02 |
| Steap1   | 312.78   | 0.95 | 0.45 | 1.33E-03 | 3.71E-02 |
| Cd14     | 1221.20  | 0.94 | 0.36 | 3.81E-04 | 1.52E-02 |
| Atoh8    | 1285.82  | 0.94 | 0.30 | 9.16E-05 | 5.20E-03 |
| Id2      | 7136.48  | 0.92 | 0.21 | 7.93E-07 | 1.12E-04 |
| Mical2   | 624.20   | 0.92 | 0.43 | 1.23E-03 | 3.51E-02 |
| Fblim1   | 766.31   | 0.92 | 0.48 | 2.07E-03 | 4.96E-02 |
| Prlr     | 1339.62  | 0.92 | 0.32 | 1.94E-04 | 8.95E-03 |
| Bgn      | 43868.75 | 0.92 | 0.22 | 1.78E-06 | 2.10E-04 |
| Mgmt     | 289.30   | 0.91 | 0.37 | 5.82E-04 | 2.09E-02 |
| Matn2    | 12253.34 | 0.90 | 0.14 | 4.63E-12 | 3.14E-09 |
| Spep     | 248.86   | 0.90 | 0.57 | 3.33E-03 | 6.87E-02 |
| Ras11a   | 639.20   | 0.90 | 0.38 | 7.66E-04 | 2.54E-02 |
| Adgra2   | 1981.25  | 0.90 | 0.22 | 2.05E-06 | 2.35E-04 |
| BC028528 | 284.52   | 0.89 | 0.47 | 1.90E-03 | 4.67E-02 |
| Igf2     | 177.73   | 0.89 | 0.54 | 3.11E-03 | 6.58E-02 |
| Adams15  | 2442.05  | 0.89 | 0.45 | 1.71E-03 | 4.37E-02 |
| Sdc3     | 2231.45  | 0.88 | 0.29 | 1.41E-04 | 7.08E-03 |
| Serf1    | 1239.45  | 0.88 | 0.25 | 2.80E-05 | 2.05E-03 |
| Plagl1   | 3806.53  | 0.87 | 0.31 | 2.14E-04 | 9.69E-03 |
| Tmem176b | 12468.60 | 0.87 | 0.18 | 1.61E-07 | 3.16E-05 |
| Agt      | 1880.82  | 0.87 | 0.50 | 2.79E-03 | 6.09E-02 |
| Trabd2b  | 772.32   | 0.87 | 0.39 | 1.12E-03 | 3.29E-02 |
| Mpz1     | 3532.29  | 0.86 | 0.11 | 7.16E-17 | 8.50E-14 |
| Dusp5    | 467.71   | 0.86 | 0.63 | 4.23E-03 | 8.01E-02 |
| Maged2   | 24181.48 | 0.86 | 0.19 | 3.25E-07 | 5.49E-05 |
| Tgfb3    | 9404.30  | 0.86 | 0.19 | 4.00E-07 | 6.37E-05 |
| Crsp1    | 7241.56  | 0.85 | 0.11 | 6.60E-15 | 6.27E-12 |
| Ak1      | 3407.41  | 0.84 | 0.12 | 6.41E-13 | 4.81E-10 |
| Plxd1    | 668.53   | 0.84 | 0.43 | 1.96E-03 | 4.77E-02 |
| Tead2    | 599.42   | 0.84 | 0.30 | 3.06E-04 | 1.25E-02 |
| Gucy1b1  | 809.90   | 0.83 | 0.31 | 3.83E-04 | 1.52E-02 |
| Tmem132a | 670.13   | 0.83 | 0.28 | 1.72E-04 | 8.19E-03 |
| Limd2    | 1315.02  | 0.83 | 0.22 | 1.10E-05 | 1.00E-03 |
| Gm10762  | 226.22   | 0.82 | 0.55 | 3.98E-03 | 7.73E-02 |
| Adams4   | 3545.73  | 0.82 | 0.35 | 8.52E-04 | 2.75E-02 |
| Irak2    | 441.36   | 0.82 | 0.36 | 9.35E-04 | 2.95E-02 |
| Lgmn     | 7447.83  | 0.81 | 0.18 | 2.84E-07 | 4.87E-05 |
| Steap2   | 1073.46  | 0.81 | 0.35 | 9.84E-04 | 3.06E-02 |
| Ror2     | 1377.11  | 0.81 | 0.28 | 2.35E-04 | 1.01E-02 |
| Klf20a   | 548.08   | 0.81 | 0.67 | 5.43E-03 | 9.39E-02 |

|           |            |      |      |          |          |
|-----------|------------|------|------|----------|----------|
| Plk2      | 1668.96    | 0.80 | 0.17 | 2.62E-07 | 4.66E-05 |
| Tcea3     | 1255.23    | 0.80 | 0.23 | 2.83E-05 | 2.06E-03 |
| Cd1d1     | 618.20     | 0.80 | 0.40 | 1.93E-03 | 4.73E-02 |
| Cdkn2c    | 563.45     | 0.79 | 0.31 | 5.02E-04 | 1.86E-02 |
| Sl3gal4   | 2843.86    | 0.79 | 0.24 | 6.32E-05 | 3.94E-03 |
| Igf2bp2   | 1166.31    | 0.78 | 0.26 | 1.32E-04 | 6.75E-03 |
| Lpcat2    | 300.97     | 0.77 | 0.51 | 3.99E-03 | 7.73E-02 |
| Cdkn1c    | 12728.74   | 0.77 | 0.21 | 1.81E-05 | 1.49E-03 |
| Cd276     | 3035.82    | 0.77 | 0.19 | 2.57E-06 | 2.86E-04 |
| Ddah1     | 558.03     | 0.77 | 0.29 | 4.44E-04 | 1.68E-02 |
| Acc3      | 3097.87    | 0.76 | 0.32 | 9.08E-04 | 2.91E-02 |
| C1qtnf6   | 6007.84    | 0.75 | 0.18 | 3.56E-06 | 3.73E-04 |
| Mpp6      | 2166.99    | 0.75 | 0.18 | 2.02E-06 | 2.34E-04 |
| Sorcs2    | 1247.13    | 0.75 | 0.33 | 1.07E-03 | 3.20E-02 |
| Azin2     | 992.47     | 0.74 | 0.27 | 3.43E-04 | 1.39E-02 |
| Ypel1     | 353.00     | 0.74 | 0.60 | 5.71E-03 | 9.67E-02 |
| Col16a1   | 13561.55   | 0.74 | 0.14 | 4.77E-09 | 1.42E-06 |
| Col3a1    | 1879394.22 | 0.74 | 0.17 | 1.49E-06 | 1.88E-04 |
| Il1r1     | 7737.35    | 0.73 | 0.21 | 3.30E-05 | 2.33E-03 |
| Mex3b     | 808.38     | 0.73 | 0.26 | 2.42E-04 | 1.03E-02 |
| Ephb3     | 2231.32    | 0.73 | 0.27 | 4.16E-04 | 1.62E-02 |
| Bex3      | 1687.77    | 0.73 | 0.20 | 2.43E-05 | 1.83E-03 |
| Nkain4    | 545.98     | 0.73 | 0.57 | 5.62E-03 | 9.54E-02 |
| Tmem42    | 524.36     | 0.72 | 0.25 | 1.81E-04 | 8.50E-03 |
| Nek6      | 2850.95    | 0.72 | 0.14 | 1.47E-08 | 3.62E-06 |
| Tspan6    | 2952.19    | 0.72 | 0.27 | 4.41E-04 | 1.67E-02 |
| Lrrn2     | 1875.99    | 0.72 | 0.32 | 1.09E-03 | 3.24E-02 |
| Chst15    | 838.60     | 0.72 | 0.48 | 4.38E-03 | 8.23E-02 |
| Bmper     | 10112.01   | 0.71 | 0.20 | 2.18E-05 | 1.71E-03 |
| Col1a1    | 705890.24  | 0.71 | 0.25 | 2.81E-04 | 1.17E-02 |
| Adgrl2    | 1432.45    | 0.70 | 0.31 | 1.16E-03 | 3.37E-02 |
| Smim3     | 2193.24    | 0.70 | 0.31 | 1.32E-03 | 3.71E-02 |
| Cyp1b1    | 6410.17    | 0.69 | 0.44 | 4.09E-03 | 7.66E-02 |
| Dact3     | 2074.16    | 0.69 | 0.30 | 1.05E-03 | 3.17E-02 |
| Psat1     | 1040.45    | 0.69 | 0.35 | 2.05E-03 | 4.95E-02 |
| Cenpa     | 385.40     | 0.69 | 0.48 | 4.92E-03 | 8.78E-02 |
| Ppic      | 23493.70   | 0.68 | 0.13 | 1.95E-08 | 4.72E-06 |
| Sned1     | 4530.53    | 0.68 | 0.34 | 2.02E-03 | 4.90E-02 |
| Col8a2    | 1920.19    | 0.68 | 0.44 | 4.66E-03 | 8.46E-02 |
| Pdgfri    | 9481.02    | 0.68 | 0.21 | 8.69E-05 | 4.97E-03 |
| Tmem176a  | 5308.95    | 0.68 | 0.20 | 4.70E-05 | 3.16E-03 |
| Tmem80    | 516.36     | 0.68 | 0.30 | 1.32E-03 | 3.70E-02 |
| Trp53inp1 | 2045.52    | 0.68 | 0.22 | 1.34E-04 | 6.83E-03 |
| Pafah1b3  | 664.23     | 0.67 | 0.26 | 4.98E-04 | 1.85E-02 |
| Fdxr      | 944.94     | 0.67 | 0.29 | 1.11E-03 | 3.28E-02 |
| Ldxb      | 1126.55    | 0.67 | 0.35 | 2.39E-03 | 5.47E-02 |
| Slc24a3   | 1036.79    | 0.67 | 0.44 | 4.39E-03 | 8.23E-02 |
| Tnfrsf23  | 697.12     | 0.67 | 0.31 | 1.61E-03 | 4.19E-02 |
| Snx8      | 1100.96    | 0.67 | 0.26 | 6.33E-04 | 2.22E-02 |
| Aass      | 309.88     | 0.67 | 0.52 | 5.84E-03 | 9.82E-02 |
| Avpr1a    | 1623.06    | 0.65 | 0.22 | 1.61E-04 | 7.82E-03 |
| Fbxw4     | 319.87     | 0.64 | 0.46 | 5.35E-03 | 9.31E-02 |
| Rnf19b    | 1554.83    | 0.64 | 0.21 | 1.63E-04 | 7.68E-03 |
| Adam19    | 3382.97    | 0.64 | 0.18 | 2.27E-05 | 1.72E-03 |
| Pkdcc     | 1757.85    | 0.63 | 0.33 | 2.58E-03 | 5.78E-02 |
| Myo1d     | 600.07     | 0.63 | 0.32 | 2.45E-03 | 5.55E-02 |
| Pdzrn3    | 1827.07    | 0.62 | 0.24 | 6.20E-04 | 2.17E-02 |
| Prr5      | 1250.40    | 0.62 | 0.35 | 3.40E-03 | 6.95E-02 |
| Tmem86a   | 1198.22    | 0.62 | 0.28 | 1.49E-03 | 3.98E-02 |
| Stom      | 3060.88    | 0.62 | 0.20 | 1.54E-04 | 7.58E-03 |
| Tns3      | 521.93     | 0.62 | 0.31 | 2.19E-03 | 5.13E-02 |
| Tpm1      | 11834.30   | 0.62 | 0.15 | 1.70E-06 | 2.05E-04 |
| Phldb2    | 3849.44    | 0.62 | 0.20 | 1.25E-04 | 6.51E-03 |
| Casp6     | 1634.77    | 0.61 | 0.23 | 4.30E-04 | 1.66E-02 |
| Isyna1    | 1117.88    | 0.61 | 0.25 | 8.44E-04 | 2.73E-02 |
| Caenb3    | 1763.39    | 0.60 | 0.25 | 9.89E-04 | 3.07E-02 |
| Fuca2     | 1823.76    | 0.60 | 0.26 | 1.14E-03 | 3.33E-02 |
| Hacd1     | 2051.03    | 0.59 | 0.27 | 1.61E-03 | 4.19E-02 |
| Tpbp      | 1725.55    | 0.59 | 0.19 | 1.16E-04 | 6.19E-03 |
| Spon2     | 18455.75   | 0.59 | 0.30 | 2.70E-03 | 5.95E-02 |
| Cfb       | 30072.91   | 0.59 | 0.15 | 4.32E-06 | 4.46E-04 |
| Mmp14     | 46583.49   | 0.59 | 0.14 | 1.52E-06 | 1.88E-04 |
| Cxcl16    | 2761.43    | 0.58 | 0.21 | 3.79E-04 | 1.51E-02 |
| Gnpda1    | 1789.42    | 0.58 | 0.24 | 1.03E-03 | 3.15E-02 |
| Dhrs3     | 7983.48    | 0.57 | 0.34 | 4.27E-03 | 8.07E-02 |
| Itm2a     | 41934.44   | 0.57 | 0.14 | 4.72E-06 | 4.80E-04 |
| Plod2     | 7075.94    | 0.57 | 0.17 | 5.10E-05 | 3.36E-03 |
| Pycr1     | 2653.75    | 0.57 | 0.20 | 3.12E-04 | 1.27E-02 |
| Stk17b    | 2263.98    | 0.56 | 0.26 | 1.77E-03 | 4.44E-02 |
| Fkbp11    | 2224.26    | 0.56 | 0.20 | 3.09E-04 | 1.26E-02 |
| Col5a2    | 46669.39   | 0.56 | 0.16 | 2.55E-05 | 1.89E-03 |
| Ptprs     | 6361.59    | 0.56 | 0.16 | 5.41E-05 | 3.50E-03 |
| Zfyve1    | 1215.35    | 0.56 | 0.23 | 1.00E-03 | 3.08E-02 |
| Rgs19     | 1182.61    | 0.56 | 0.21 | 6.06E-04 | 2.14E-02 |
| Ifi30     | 1495.09    | 0.56 | 0.22 | 8.17E-04 | 2.65E-02 |
| Lum       | 225687.60  | 0.56 | 0.14 | 8.98E-06 | 8.59E-04 |
| Fxyd5     | 4302.85    | 0.56 | 0.15 | 1.47E-05 | 1.29E-03 |
| Wdr6      | 3108.06    | 0.55 | 0.14 | 5.51E-06 | 5.56E-04 |
| Cpxm1     | 23753.60   | 0.54 | 0.16 | 5.32E-05 | 3.46E-03 |
| Enpp1     | 2271.68    | 0.54 | 0.24 | 1.66E-03 | 4.27E-02 |
| Arfgap2   | 1573.90    | 0.54 | 0.20 | 5.01E-04 | 1.86E-02 |
| Lhpb      | 495.94     | 0.53 | 0.33 | 5.32E-03 | 9.30E-02 |
| Col12a1   | 6466.14    | 0.53 | 0.31 | 4.43E-03 | 8.26E-02 |
| Col1a2    | 65537.72   | 0.53 | 0.16 | 6.54E-05 | 3.99E-03 |
| Igf1bp7   | 73601.17   | 0.53 | 0.09 | 3.69E-10 | 1.38E-07 |
| Rgs3      | 1468.75    | 0.52 | 0.32 | 5.26E-03 | 9.22E-02 |
| Src       | 813.00     | 0.52 | 0.28 | 3.85E-03 | 7.57E-02 |
| Crf2      | 504.46     | 0.51 | 0.28 | 4.00E-03 | 7.74E-02 |
| Igf1bp4   | 54166.09   | 0.51 | 0.09 | 3.73E-09 | 1.13E-06 |
| Vmp1      | 7540.48    | 0.51 | 0.11 | 1.68E-07 | 3.18E-05 |
| Slc39a14  | 2810.75    | 0.51 | 0.29 | 4.57E-03 | 8.36E-02 |
| Tceal9    | 10808.99   | 0.51 | 0.13 | 9.60E-06 | 8.99E-04 |

|          |           |      |      |          |          |
|----------|-----------|------|------|----------|----------|
| Chsy1    | 1734.00   | 0.51 | 0.23 | 2.15E-03 | 5.06E-02 |
| Rgs10    | 838.24    | 0.50 | 0.22 | 1.61E-03 | 4.19E-02 |
| Prrx2    | 2402.38   | 0.50 | 0.26 | 3.51E-03 | 7.14E-02 |
| Lox      | 25916.77  | 0.50 | 0.19 | 7.54E-04 | 2.51E-02 |
| Tmem53   | 941.53    | 0.49 | 0.29 | 5.22E-03 | 9.19E-02 |
| Raly     | 3268.74   | 0.49 | 0.22 | 1.77E-03 | 4.44E-02 |
| Spats2   | 1804.01   | 0.49 | 0.21 | 1.69E-03 | 4.35E-02 |
| Olfml3   | 15665.51  | 0.49 | 0.19 | 7.16E-04 | 2.42E-02 |
| Btg1     | 12529.70  | 0.48 | 0.24 | 3.14E-03 | 6.62E-02 |
| Ptd3     | 6666.00   | 0.48 | 0.14 | 6.56E-05 | 3.99E-03 |
| Grb10    | 28105.85  | 0.48 | 0.16 | 2.86E-04 | 1.18E-02 |
| Elk3     | 2648.21   | 0.48 | 0.13 | 2.94E-05 | 2.13E-03 |
| Slc22a17 | 1934.45   | 0.47 | 0.18 | 1.00E-03 | 3.08E-02 |
| Ma1b     | 3117.18   | 0.47 | 0.28 | 4.98E-03 | 8.88E-02 |
| B4galt5  | 1528.34   | 0.46 | 0.22 | 2.75E-03 | 6.03E-02 |
| Mmp2     | 115941.83 | 0.46 | 0.09 | 9.14E-08 | 1.94E-05 |
| L3hypdh  | 2218.83   | 0.45 | 0.16 | 5.40E-04 | 1.97E-02 |
| Ctsk     | 20437.72  | 0.45 | 0.15 | 2.78E-04 | 1.16E-02 |
| Ap1ar    | 2349.90   | 0.45 | 0.17 | 7.19E-04 | 2.43E-02 |
| Aprt     | 2264.95   | 0.45 | 0.19 | 1.54E-03 | 4.10E-02 |
| Msl2     | 1920.28   | 0.45 | 0.22 | 3.52E-03 | 7.15E-02 |
| Nin      | 1865.78   | 0.45 | 0.22 | 3.30E-03 | 6.82E-02 |
| Rgs12    | 1323.07   | 0.45 | 0.17 | 7.21E-04 | 2.43E-02 |
| Sparc    | 616721.07 | 0.45 | 0.17 | 7.30E-04 | 2.45E-02 |
| Plpp1    | 9796.49   | 0.44 | 0.21 | 2.86E-03 | 6.20E-02 |
| Pfkm     | 1319.67   | 0.44 | 0.19 | 1.57E-03 | 4.13E-02 |
| Fam49b   | 947.62    | 0.44 | 0.25 | 5.52E-03 | 9.45E-02 |
| Rnf149   | 1301.19   | 0.44 | 0.21 | 3.50E-03 | 7.12E-02 |
| Cnn2     | 4711.02   | 0.43 | 0.14 | 1.86E-04 | 8.67E-03 |
| Fkbp10   | 17479.44  | 0.43 | 0.13 | 1.05E-04 | 5.72E-03 |
| Ckap4    | 11254.93  | 0.43 | 0.12 | 5.48E-05 | 3.52E-03 |
| Rab31    | 6708.08   | 0.43 | 0.16 | 6.63E-04 | 2.27E-02 |
| Chpf     | 15296.77  | 0.42 | 0.14 | 2.82E-04 | 1.17E-02 |
| Tubb2a   | 11454.38  | 0.42 | 0.13 | 1.03E-04 | 5.67E-03 |
| Hif1a    | 9069.97   | 0.42 | 0.15 | 5.40E-04 | 1.97E-02 |
| Serpinh1 | 201034.21 | 0.41 | 0.12 | 1.40E-04 | 7.08E-03 |
| Cdkn1a   | 8022.77   | 0.41 | 0.18 | 2.20E-03 | 5.16E-02 |
| Dera     | 1309.35   | 0.41 | 0.22 | 5.81E-03 | 9.80E-02 |
| Csrp2    | 4849.13   | 0.41 | 0.21 | 5.24E-03 | 9.21E-02 |
| Mmp23    | 14640.45  | 0.40 | 0.13 | 5.26E-04 | 1.93E-02 |
| Slc35b2  | 5896.57   | 0.40 | 0.13 | 3.42E-04 | 1.39E-02 |
| Gnb5     | 2015.57   | 0.39 | 0.17 | 2.36E-03 | 5.43E-02 |
| Gpx7     | 6084.51   | 0.39 | 0.14 | 7.81E-04 | 2.56E-02 |
| Rab5c    | 1582.66   | 0.39 | 0.18 | 3.22E-03 | 6.73E-02 |
| Ebpl     | 1309.34   | 0.39 | 0.16 | 1.81E-03 | 4.49E-02 |
| Pck2     | 2170.59   | 0.38 | 0.18 | 3.01E-03 | 6.40E-02 |
| Cdk4     | 9107.73   | 0.38 | 0.10 | 1.97E-05 | 1.59E-03 |
| Galnt10  | 4343.58   | 0.37 | 0.20 | 5.96E-03 | 9.98E-02 |
| Plin2    | 7713.75   | 0.37 | 0.16 | 2.67E-03 | 5.91E-02 |
| Ormdl3   | 4560.35   | 0.37 | 0.15 | 2.64E-03 | 5.86E-02 |
| Lars2    | 73256.65  | 0.36 | 0.14 | 1.42E-03 | 3.87E-02 |
| Idh2     | 5637.98   | 0.36 | 0.14 | 1.33E-03 | 3.71E-02 |
| Sec61b   | 6075.86   | 0.36 | 0.17 | 4.12E-03 | 7.69E-02 |
| Sccpdh   | 2337.42   | 0.36 | 0.17 | 4.52E-03 | 8.34E-02 |
| Smyd2    | 1934.15   | 0.36 | 0.16 | 3.70E-03 | 7.38E-02 |
| Litaf    | 10265.76  | 0.36 | 0.13 | 7.78E-04 | 2.56E-02 |
| Maged1   | 26892.38  | 0.36 | 0.11 | 1.86E-04 | 8.67E-03 |
| Sh3bp5   | 3052.59   | 0.35 | 0.16 | 3.92E-03 | 7.67E-02 |
| Sh3bgr13 | 5856.32   | 0.35 | 0.18 | 5.96E-03 | 9.98E-02 |
| Arf5     | 10719.56  | 0.35 | 0.14 | 1.58E-03 | 4.15E-02 |
| Hmgn2    | 10563.76  | 0.35 | 0.11 | 2.35E-04 | 1.01E-02 |
| Pofu12   | 12283.70  | 0.35 | 0.15 | 2.98E-03 | 6.38E-02 |
| B4galt2  | 2976.09   | 0.34 | 0.16 | 4.54E-03 | 8.35E-02 |
| Atp6v0e  | 8464.90   | 0.34 | 0.17 | 5.78E-03 | 9.76E-02 |
| Rad23b   | 3065.18   | 0.34 | 0.13 | 1.55E-03 | 4.11E-02 |
| Ssr2     | 13868.75  | 0.34 | 0.14 | 2.13E-03 | 5.03E-02 |
| Slc25a20 | 3086.97   | 0.34 | 0.16 | 4.57E-03 | 8.36E-02 |
| Cnpy2    | 7871.10   | 0.33 | 0.15 | 3.21E-03 | 6.72E-02 |
| Flnn     | 3942.15   | 0.33 | 0.16 | 5.34E-03 | 9.30E-02 |
| Mapkapk2 | 6038.98   | 0.33 | 0.13 | 1.94E-03 | 4.74E-02 |
| Dapk3    | 2641.74   | 0.33 | 0.13 | 2.07E-03 | 4.96E-02 |
| Xprnep1  | 5205.55   | 0.32 | 0.10 | 2.18E-04 | 9.76E-03 |
| Lhfp     | 19576.41  | 0.32 | 0.10 | 2.19E-04 | 9.76E-03 |
| Rcn1     | 21308.67  | 0.32 | 0.10 | 1.72E-04 | 8.19E-03 |
| Col5a1   | 80857.84  | 0.31 | 0.12 | 9.54E-04 | 2.99E-02 |
| Prdx5    | 8484.11   | 0.31 | 0.13 | 2.42E-03 | 5.51E-02 |
| Ap2s1    | 3880.29   | 0.30 | 0.14 | 5.34E-03 | 9.30E-02 |
| Cope     | 12108.77  | 0.30 | 0.11 | 1.05E-03 | 3.17E-02 |
| Cd63     | 62220.11  | 0.30 | 0.14 | 5.36E-03 | 9.31E-02 |
| Mcrip1   | 8103.41   | 0.30 | 0.12 | 2.73E-03 | 6.01E-02 |
| Cmtm3    | 17081.57  | 0.30 | 0.10 | 4.96E-04 | 1.85E-02 |
| Dbi      | 6010.57   | 0.30 | 0.11 | 1.18E-03 | 3.42E-02 |
| Eno1     | 24361.90  | 0.30 | 0.11 | 1.19E-03 | 3.43E-02 |
| Cdk5rap3 | 4806.62   | 0.30 | 0.14 | 5.92E-03 | 9.93E-02 |
| Tmem9    | 4069.82   | 0.29 | 0.13 | 3.54E-03 | 7.16E-02 |
| Htra1    | 50779.65  | 0.29 | 0.09 | 1.76E-04 | 8.31E-03 |
| Itm2c    | 20552.39  | 0.29 | 0.11 | 2.07E-03 | 4.97E-02 |
| Gosr2    | 8457.73   | 0.28 | 0.12 | 4.17E-03 | 7.94E-02 |
| Dad1     | 9196.66   | 0.28 | 0.12 | 4.50E-03 | 8.32E-02 |
| Colgalt1 | 11571.08  | 0.28 | 0.12 | 3.72E-03 | 7.40E-02 |
| Ykt6     | 4789.89   | 0.27 | 0.11 | 3.28E-03 | 6.80E-02 |
| H1f0     | 19798.81  | 0.27 | 0.12 | 4.36E-03 | 8.21E-02 |
| Sparc1   | 28547.89  | 0.26 | 0.09 | 1.32E-03 | 3.70E-02 |
| Scube2   | 167.67    | 0.20 | 0.42 | 2.29E-03 | 5.28E-02 |
| Wldc17   | 239.42    | 0.16 | 0.32 | 1.07E-03 | 3.20E-02 |
| Ms4abc   | 86.39     | 0.16 | 0.31 | 1.11E-03 | 3.28E-02 |
| Fgd6     | 74.69     | 0.16 | 0.32 | 4.11E-04 | 1.61E-02 |
| Zfp57    | 83.34     | 0.15 | 0.29 | 4.92E-03 | 8.78E-02 |
| Adams17  | 104.01    | 0.15 | 0.29 | 6.15E-05 | 3.86E-03 |
| Plekhd4  | 91.53     | 0.14 | 0.29 | 8.30E-12 | 4.93E-09 |
| Clec4a3  | 145.25    | 0.14 | 0.27 | 9.46E-05 | 5.28E-03 |
| Myrf     | 265.82    | 0.14 | 0.26 | 1.74E-03 | 4.43E-02 |

|               |           |       |      |          |          |
|---------------|-----------|-------|------|----------|----------|
| Kif26b        | 77.87     | 0.14  | 0.27 | 2.00E-11 | 1.09E-08 |
| Agr2          | 715.94    | 0.13  | 0.26 | 1.57E-04 | 7.71E-03 |
| Lyz2          | 7638.76   | 0.13  | 0.26 | 2.09E-03 | 4.98E-02 |
| Scn3b         | 176.57    | 0.13  | 0.25 | 4.37E-03 | 8.22E-02 |
| Brnp3         | 135.20    | 0.12  | 0.24 | 1.93E-03 | 4.73E-02 |
| Ripor3        | 115.69    | 0.12  | 0.24 | 4.50E-03 | 8.32E-02 |
| C1ql3         | 61.92     | 0.12  | 0.24 | 2.92E-03 | 6.28E-02 |
| Actg2         | 198.10    | 0.12  | 0.23 | 2.76E-03 | 6.04E-02 |
| Ccl4          | 167.94    | 0.11  | 0.23 | 5.06E-05 | 3.36E-03 |
| Plk3ap1       | 102.28    | 0.11  | 0.22 | 2.37E-04 | 1.02E-02 |
| Cd93          | 85.60     | 0.11  | 0.22 | 6.05E-05 | 3.81E-03 |
| Cd300a        | 106.29    | 0.10  | 0.22 | 2.87E-03 | 6.20E-02 |
| Crabp2        | 100.92    | 0.10  | 0.22 | 8.55E-06 | 8.23E-04 |
| Il1a          | 55.28     | 0.10  | 0.22 | 6.26E-09 | 1.82E-06 |
| Tmem44        | 125.77    | 0.09  | 0.21 | 3.87E-03 | 7.60E-02 |
| Calcb         | 82.63     | 0.09  | 0.20 | 3.38E-05 | 2.37E-03 |
| Mmp12         | 95.87     | 0.08  | 0.20 | 4.11E-03 | 7.88E-02 |
| Col9a3        | 51.49     | 0.08  | 0.20 | 1.96E-03 | 4.77E-02 |
| Creg2         | 90.63     | 0.08  | 0.20 | 1.40E-03 | 3.84E-02 |
| Adgre1        | 280.54    | 0.08  | 0.19 | 3.41E-03 | 6.95E-02 |
| Mmp9          | 320.69    | 0.08  | 0.19 | 4.83E-03 | 8.66E-02 |
| Ocstamp       | 34.70     | 0.07  | 0.19 | 3.56E-03 | 7.18E-02 |
| Prss35        | 186.59    | 0.07  | 0.19 | 1.56E-03 | 4.12E-02 |
| Cyp26a1       | 61.94     | 0.07  | 0.19 | 1.62E-05 | 1.38E-03 |
| Itgb2         | 307.42    | 0.07  | 0.19 | 5.14E-03 | 9.08E-02 |
| Cd244a        | 38.02     | 0.07  | 0.19 | 4.17E-07 | 6.50E-05 |
| Lrrc15        | 829.89    | 0.06  | 0.19 | 4.38E-05 | 2.99E-03 |
| Sirpb1c       | 47.21     | 0.06  | 0.19 | 9.45E-07 | 1.28E-04 |
| Arhgap9       | 70.53     | 0.06  | 0.19 | 4.05E-03 | 7.79E-02 |
| 4930432K21Rik | 24.41     | 0.06  | 0.18 | 1.50E-05 | 1.30E-03 |
| Cla2b         | 25.09     | 0.05  | 0.18 | 4.15E-04 | 1.62E-02 |
| Uox           | 32.83     | 0.05  | 0.18 | 1.93E-04 | 8.92E-03 |
| Cyp2e1        | 91.61     | 0.05  | 0.18 | 5.55E-03 | 9.47E-02 |
| Fcgr4         | 59.78     | 0.05  | 0.18 | 5.42E-04 | 1.97E-02 |
| Chi1          | 175.78    | 0.05  | 0.18 | 4.21E-03 | 7.98E-02 |
| Calca         | 93.16     | 0.05  | 0.18 | 4.17E-03 | 7.94E-02 |
| Pr12c2        | 65.57     | 0.05  | 0.18 | 6.87E-04 | 2.34E-02 |
| Nxpe5         | 22.34     | 0.05  | 0.18 | 2.06E-03 | 4.95E-02 |
| Fcgr1         | 40.39     | 0.05  | 0.18 | 1.56E-03 | 4.13E-02 |
| Gm14851       | 52.34     | 0.05  | 0.18 | 6.39E-04 | 2.23E-02 |
| C130050O18Rik | 22.28     | 0.04  | 0.18 | 9.68E-05 | 5.37E-03 |
| Gpr62         | 24.80     | 0.04  | 0.17 | 5.47E-03 | 9.41E-02 |
| F2r2          | 23.86     | 0.04  | 0.17 | 9.68E-05 | 5.37E-03 |
| Sirpb1a       | 18.59     | 0.04  | 0.17 | 6.55E-04 | 2.26E-02 |
| Defa29        | 28.49     | 0.03  | 0.17 | 5.29E-03 | 9.27E-02 |
| Gpr34         | 34.13     | 0.02  | 0.17 | 1.75E-03 | 4.43E-02 |
| Sl6galnac3    | 30.40     | 0.02  | 0.17 | 2.45E-03 | 5.55E-02 |
| Matn3         | 28.66     | 0.02  | 0.17 | 2.89E-03 | 6.22E-02 |
| Clec5a        | 22.44     | 0.02  | 0.17 | 3.98E-03 | 7.73E-02 |
| Lct           | 44.31     | 0.02  | 0.17 | 2.63E-03 | 5.85E-02 |
| Plkd1         | 27.26     | -0.02 | 0.17 | 1.86E-03 | 4.60E-02 |
| Jph1          | 34.59     | -0.02 | 0.17 | 8.18E-04 | 2.65E-02 |
| Ssr1          | 20.12     | -0.04 | 0.17 | 4.27E-04 | 1.65E-02 |
| Balap2l2      | 61.77     | -0.04 | 0.17 | 4.81E-03 | 8.66E-02 |
| Capn2         | 17086.81  | -0.22 | 0.08 | 2.23E-03 | 5.19E-02 |
| Lpar1         | 22572.01  | -0.23 | 0.09 | 3.91E-03 | 7.65E-02 |
| Esyt2         | 11386.85  | -0.24 | 0.09 | 2.83E-03 | 6.16E-02 |
| Aplp2         | 23609.45  | -0.24 | 0.10 | 5.07E-03 | 9.00E-02 |
| Rbj           | 6951.42   | -0.24 | 0.10 | 4.83E-03 | 8.66E-02 |
| Tmem65        | 7102.70   | -0.25 | 0.10 | 4.58E-03 | 8.36E-02 |
| Timp2         | 243173.16 | -0.25 | 0.10 | 2.66E-03 | 5.90E-02 |
| Efr3a         | 9700.65   | -0.25 | 0.09 | 1.29E-03 | 3.64E-02 |
| Cul1          | 9097.31   | -0.26 | 0.10 | 2.60E-03 | 5.80E-02 |
| Fgfr1         | 20594.38  | -0.26 | 0.12 | 5.44E-03 | 9.39E-02 |
| Nptn          | 13677.96  | -0.27 | 0.11 | 4.50E-03 | 8.32E-02 |
| Clic4         | 28974.74  | -0.27 | 0.10 | 2.03E-03 | 4.91E-02 |
| Pldxc2        | 27005.76  | -0.28 | 0.12 | 4.17E-03 | 7.94E-02 |
| Kras          | 7419.29   | -0.28 | 0.12 | 5.05E-03 | 8.98E-02 |
| Mapre2        | 7637.63   | -0.28 | 0.12 | 3.66E-03 | 7.35E-02 |
| Pdgfra        | 26082.51  | -0.28 | 0.12 | 4.47E-03 | 8.29E-02 |
| Nckap1        | 17116.00  | -0.29 | 0.10 | 1.05E-03 | 3.17E-02 |
| Ilf6          | 34068.31  | -0.29 | 0.13 | 5.40E-03 | 9.35E-02 |
| Anxa7         | 6545.30   | -0.30 | 0.12 | 2.52E-03 | 5.67E-02 |
| Pollm5        | 5910.46   | -0.30 | 0.13 | 3.19E-03 | 6.71E-02 |
| Efr5          | 13888.35  | -0.30 | 0.13 | 2.91E-03 | 6.27E-02 |
| Ebf1          | 14358.18  | -0.31 | 0.12 | 2.54E-03 | 5.70E-02 |
| Fcho2         | 4590.36   | -0.31 | 0.14 | 4.57E-03 | 8.36E-02 |
| Pacsin2       | 8127.25   | -0.31 | 0.14 | 5.46E-03 | 9.40E-02 |
| Tns1          | 7987.55   | -0.31 | 0.12 | 2.46E-03 | 5.56E-02 |
| Sloca3a1      | 7659.68   | -0.31 | 0.12 | 1.55E-03 | 4.11E-02 |
| Fam102b       | 13796.61  | -0.31 | 0.13 | 2.41E-03 | 5.48E-02 |
| Pkd2          | 14087.80  | -0.31 | 0.11 | 6.48E-04 | 2.24E-02 |
| Cd34          | 128982.41 | -0.31 | 0.14 | 4.72E-03 | 8.55E-02 |
| Stag2         | 4534.00   | -0.32 | 0.15 | 5.33E-03 | 9.30E-02 |
| Tmeff2        | 10700.43  | -0.32 | 0.14 | 4.14E-03 | 7.91E-02 |
| Nr3c1         | 11953.75  | -0.33 | 0.12 | 1.18E-03 | 3.42E-02 |
| Reep3         | 6845.61   | -0.33 | 0.15 | 4.55E-03 | 8.35E-02 |
| Rhoq          | 12834.99  | -0.33 | 0.12 | 1.24E-03 | 3.55E-02 |
| Pcfl1         | 3656.44   | -0.33 | 0.14 | 2.60E-03 | 5.80E-02 |
| Prpf8         | 3481.77   | -0.33 | 0.16 | 4.52E-03 | 8.34E-02 |
| Dnm1          | 9623.44   | -0.33 | 0.13 | 1.48E-03 | 3.97E-02 |
| Zyx           | 24732.76  | -0.33 | 0.13 | 1.49E-03 | 3.98E-02 |
| Penk          | 47052.74  | -0.33 | 0.15 | 2.95E-03 | 6.32E-02 |
| Fam111a       | 3217.80   | -0.34 | 0.16 | 4.64E-03 | 8.43E-02 |
| Irgm2         | 6977.44   | -0.34 | 0.17 | 4.39E-03 | 8.23E-02 |
| Akap13        | 7536.50   | -0.34 | 0.16 | 4.77E-03 | 8.60E-02 |
| Tom1l2        | 3974.83   | -0.34 | 0.16 | 4.12E-03 | 7.89E-02 |
| Pcdh18        | 6190.13   | -0.35 | 0.14 | 1.78E-03 | 4.45E-02 |
| Arhgef10      | 4877.35   | -0.35 | 0.17 | 5.52E-03 | 9.45E-02 |
| Dpep1         | 48618.03  | -0.35 | 0.13 | 6.71E-04 | 2.30E-02 |
| Nfatc3        | 2458.17   | -0.36 | 0.16 | 3.77E-03 | 7.47E-02 |
| Esco1         | 1747.36   | -0.36 | 0.18 | 5.92E-03 | 9.93E-02 |

|                |           |       |      |          |          |
|----------------|-----------|-------|------|----------|----------|
| Etemp1         | 94412.62  | -0.36 | 0.18 | 5.25E-03 | 9.22E-02 |
| Tax1bp1        | 14828.65  | -0.36 | 0.13 | 1.12E-03 | 3.29E-02 |
| Tmem106b       | 8024.85   | -0.36 | 0.14 | 1.65E-03 | 4.27E-02 |
| Ndrgr1         | 6364.66   | -0.36 | 0.13 | 1.08E-03 | 3.23E-02 |
| Prkd3          | 4277.98   | -0.36 | 0.17 | 4.43E-03 | 8.26E-02 |
| Cmtm6          | 9362.57   | -0.36 | 0.14 | 1.13E-03 | 3.30E-02 |
| Klf3           | 13505.81  | -0.36 | 0.18 | 5.58E-03 | 9.51E-02 |
| Mll2           | 1929.27   | -0.36 | 0.18 | 5.12E-03 | 9.08E-02 |
| Zdthc13        | 1444.70   | -0.36 | 0.18 | 4.82E-03 | 8.66E-02 |
| Wdfy2          | 2936.72   | -0.36 | 0.17 | 4.45E-03 | 8.28E-02 |
| Cd47           | 28015.31  | -0.36 | 0.12 | 5.78E-04 | 2.08E-02 |
| Arhgap12       | 4139.50   | -0.36 | 0.15 | 2.05E-03 | 4.95E-02 |
| Ncor1          | 5820.53   | -0.36 | 0.16 | 2.95E-03 | 6.33E-02 |
| Smarcc2        | 7111.80   | -0.37 | 0.14 | 1.12E-03 | 3.29E-02 |
| Slk3           | 3657.05   | -0.37 | 0.15 | 1.62E-03 | 4.19E-02 |
| Larp6          | 3168.05   | -0.37 | 0.17 | 3.82E-03 | 7.53E-02 |
| Irak3          | 6301.22   | -0.37 | 0.14 | 1.43E-03 | 3.89E-02 |
| Golm4          | 11286.75  | -0.37 | 0.16 | 2.86E-03 | 6.20E-02 |
| Cfh            | 23747.38  | -0.37 | 0.14 | 1.31E-03 | 3.69E-02 |
| Lats2          | 5802.11   | -0.37 | 0.15 | 1.33E-03 | 3.71E-02 |
| Mtum           | 7268.79   | -0.37 | 0.18 | 3.57E-03 | 7.21E-02 |
| Phf20          | 2061.48   | -0.37 | 0.14 | 1.20E-03 | 3.45E-02 |
| Smim10f1       | 4991.66   | -0.37 | 0.12 | 4.36E-04 | 1.67E-02 |
| Ppp1r15b       | 5828.14   | -0.38 | 0.14 | 7.86E-04 | 2.57E-02 |
| C1qtnf1        | 16632.26  | -0.38 | 0.09 | 3.15E-06 | 3.38E-04 |
| Slc29a1        | 23982.70  | -0.38 | 0.15 | 1.75E-03 | 4.43E-02 |
| Slk38          | 9411.73   | -0.38 | 0.13 | 5.69E-04 | 2.05E-02 |
| Ard4b          | 1913.27   | -0.39 | 0.14 | 7.84E-04 | 2.57E-02 |
| Zdthc8         | 2267.36   | -0.39 | 0.15 | 1.45E-03 | 3.91E-02 |
| Klf9           | 11298.20  | -0.39 | 0.11 | 9.30E-05 | 5.24E-03 |
| Magt1          | 6488.73   | -0.39 | 0.18 | 3.35E-03 | 6.89E-02 |
| Mtt2           | 1190.24   | -0.39 | 0.18 | 3.25E-03 | 6.77E-02 |
| Hspa12a        | 2142.79   | -0.39 | 0.19 | 3.69E-03 | 7.37E-02 |
| Ufn1           | 3104.70   | -0.39 | 0.17 | 2.16E-03 | 5.07E-02 |
| Top2b          | 6581.57   | -0.39 | 0.19 | 3.67E-03 | 7.36E-02 |
| Nid1           | 146994.87 | -0.40 | 0.09 | 2.90E-06 | 3.15E-04 |
| Tubb4a         | 5521.05   | -0.40 | 0.10 | 9.57E-06 | 8.99E-04 |
| Papsa2         | 6404.68   | -0.40 | 0.15 | 9.18E-04 | 2.93E-02 |
| Manea          | 3687.03   | -0.40 | 0.20 | 4.55E-03 | 8.35E-02 |
| Mfn2           | 4274.68   | -0.40 | 0.20 | 4.57E-03 | 8.36E-02 |
| Zbtb20         | 18534.73  | -0.40 | 0.19 | 4.02E-03 | 7.76E-02 |
| Sipa1          | 5433.49   | -0.40 | 0.14 | 6.17E-04 | 2.17E-02 |
| Cyfp1          | 11543.04  | -0.40 | 0.15 | 9.36E-04 | 2.95E-02 |
| Sdc2           | 41085.74  | -0.40 | 0.13 | 2.23E-04 | 9.90E-03 |
| Adgrd1         | 21087.47  | -0.40 | 0.14 | 6.84E-04 | 2.33E-02 |
| Mier3          | 2526.02   | -0.40 | 0.21 | 5.83E-03 | 9.82E-02 |
| Lamc1          | 65477.38  | -0.40 | 0.12 | 7.66E-05 | 4.57E-03 |
| Gapvd1         | 3898.37   | -0.40 | 0.12 | 1.35E-04 | 6.85E-03 |
| Heg1           | 23232.29  | -0.40 | 0.16 | 1.37E-03 | 3.78E-02 |
| Adamts4        | 11980.11  | -0.41 | 0.16 | 1.41E-03 | 3.85E-02 |
| Csf1           | 27067.22  | -0.41 | 0.15 | 6.81E-04 | 2.33E-02 |
| Lrch3          | 5318.31   | -0.41 | 0.13 | 2.72E-04 | 1.15E-02 |
| Axl            | 111258.22 | -0.41 | 0.15 | 5.26E-04 | 1.93E-02 |
| Ltbp4          | 89060.44  | -0.41 | 0.21 | 4.62E-03 | 8.41E-02 |
| Edem2          | 5210.99   | -0.41 | 0.13 | 2.31E-04 | 1.01E-02 |
| Wdfy3          | 3790.73   | -0.41 | 0.20 | 3.34E-03 | 6.89E-02 |
| Cd55           | 32533.95  | -0.42 | 0.17 | 1.59E-03 | 4.17E-02 |
| Atp2b1         | 3881.98   | -0.42 | 0.23 | 5.81E-03 | 9.80E-02 |
| Agap1          | 3561.29   | -0.42 | 0.23 | 5.62E-03 | 9.54E-02 |
| At2            | 3636.41   | -0.42 | 0.12 | 7.16E-05 | 4.32E-03 |
| Smc1a          | 5628.70   | -0.42 | 0.17 | 1.36E-03 | 3.76E-02 |
| 1700047117Rik2 | 4050.90   | -0.42 | 0.20 | 2.84E-03 | 6.17E-02 |
| Cpd            | 6356.28   | -0.42 | 0.14 | 3.74E-04 | 1.50E-02 |
| Qpct           | 23535.72  | -0.42 | 0.15 | 7.71E-04 | 2.54E-02 |
| Ifngr1         | 24387.27  | -0.43 | 0.12 | 3.27E-05 | 2.32E-03 |
| Cpne3          | 3908.19   | -0.43 | 0.18 | 1.92E-03 | 4.71E-02 |
| Sca1b          | 1902.53   | -0.43 | 0.21 | 3.38E-03 | 6.92E-02 |
| Mbn1           | 20370.93  | -0.43 | 0.15 | 3.75E-04 | 1.50E-02 |
| Elmsan1        | 1074.93   | -0.43 | 0.23 | 5.13E-03 | 9.08E-02 |
| Bcor           | 1041.61   | -0.43 | 0.22 | 4.18E-03 | 7.94E-02 |
| Tgfb1          | 33155.38  | -0.44 | 0.19 | 2.21E-03 | 5.16E-02 |
| Fn1            | 209665.48 | -0.44 | 0.19 | 1.77E-03 | 4.44E-02 |
| Olud1          | 1394.08   | -0.45 | 0.19 | 1.90E-03 | 4.67E-02 |
| Pard3          | 2123.09   | -0.45 | 0.23 | 4.18E-03 | 7.94E-02 |
| Glud1          | 11317.61  | -0.45 | 0.12 | 1.87E-05 | 1.53E-03 |
| Ifih1          | 2283.88   | -0.45 | 0.16 | 4.27E-04 | 1.65E-02 |
| Trip10         | 14668.44  | -0.46 | 0.12 | 1.47E-05 | 1.29E-03 |
| Mapk8ip3       | 2000.73   | -0.46 | 0.15 | 2.17E-04 | 9.76E-03 |
| Xdh            | 31622.59  | -0.46 | 0.20 | 2.11E-03 | 5.01E-02 |
| Hmcn2          | 14495.41  | -0.46 | 0.26 | 5.53E-03 | 9.45E-02 |
| Ces1d          | 13923.01  | -0.46 | 0.17 | 4.97E-04 | 1.85E-02 |
| Prelp          | 38933.31  | -0.46 | 0.17 | 6.49E-04 | 2.24E-02 |
| Pold3          | 1496.47   | -0.46 | 0.27 | 5.47E-03 | 9.41E-02 |
| Slc43a3        | 50166.90  | -0.46 | 0.23 | 3.69E-03 | 7.37E-02 |
| Atp6v0e2       | 2157.72   | -0.47 | 0.17 | 5.49E-04 | 1.99E-02 |
| Atp7a          | 1726.08   | -0.47 | 0.19 | 1.39E-03 | 3.81E-02 |
| Tctn3          | 957.48    | -0.47 | 0.23 | 3.30E-03 | 6.82E-02 |
| Cry2           | 3516.04   | -0.47 | 0.15 | 2.32E-04 | 1.01E-02 |
| Hs3st1         | 1897.40   | -0.47 | 0.22 | 2.67E-03 | 5.90E-02 |
| Lamb2          | 37232.27  | -0.47 | 0.15 | 2.14E-04 | 9.69E-03 |
| Naa15          | 1985.85   | -0.47 | 0.21 | 2.12E-03 | 5.03E-02 |
| Bmp4           | 6244.76   | -0.47 | 0.24 | 3.38E-03 | 6.92E-02 |
| Traf5          | 1709.61   | -0.48 | 0.16 | 2.28E-04 | 9.99E-03 |
| Bclaf1         | 5094.02   | -0.48 | 0.21 | 1.74E-03 | 4.43E-02 |
| Slc37a4        | 1021.86   | -0.48 | 0.26 | 4.29E-03 | 8.09E-02 |
| Csgalnact2     | 6317.11   | -0.48 | 0.14 | 5.07E-05 | 3.36E-03 |
| Pgf            | 910.97    | -0.48 | 0.25 | 3.70E-03 | 7.37E-02 |
| Ncoa2          | 1730.27   | -0.48 | 0.23 | 2.75E-03 | 6.03E-02 |
| Slc1a4         | 1200.83   | -0.48 | 0.25 | 3.62E-03 | 7.29E-02 |
| Cast           | 13511.35  | -0.48 | 0.16 | 2.10E-04 | 9.58E-03 |
| Cask           | 3704.32   | -0.48 | 0.18 | 4.58E-04 | 1.73E-02 |
| Adamts5        | 9890.96   | -0.49 | 0.15 | 8.25E-05 | 4.80E-03 |

|               |            |       |      |          |          |
|---------------|------------|-------|------|----------|----------|
| Konk5         | 2477.14    | -0.49 | 0.23 | 2.48E-03 | 5.61E-02 |
| Gsn           | 2378472.30 | -0.49 | 0.14 | 3.47E-05 | 2.42E-03 |
| Rb1cc1        | 3355.99    | -0.49 | 0.21 | 1.51E-03 | 4.02E-02 |
| Sirpa         | 10419.89   | -0.49 | 0.15 | 1.03E-04 | 5.67E-03 |
| Simap         | 4033.28    | -0.49 | 0.19 | 7.89E-04 | 2.57E-02 |
| Sptbn1        | 25818.55   | -0.49 | 0.11 | 6.02E-07 | 8.92E-05 |
| Zhx2          | 1179.43    | -0.50 | 0.26 | 3.81E-03 | 7.51E-02 |
| Sacm1l        | 6565.34    | -0.50 | 0.14 | 2.25E-05 | 1.72E-03 |
| Mindy2        | 3473.91    | -0.50 | 0.16 | 1.98E-04 | 9.09E-03 |
| Ncoa6         | 1529.63    | -0.50 | 0.19 | 7.01E-04 | 2.38E-02 |
| Clock         | 2631.49    | -0.50 | 0.21 | 1.35E-03 | 3.75E-02 |
| Ece1          | 9225.15    | -0.50 | 0.12 | 3.01E-06 | 3.25E-04 |
| Btaf1         | 1520.44    | -0.50 | 0.20 | 1.06E-03 | 3.19E-02 |
| Uap1          | 27739.75   | -0.50 | 0.11 | 2.81E-07 | 4.87E-05 |
| Pkia          | 3271.08    | -0.50 | 0.23 | 1.86E-03 | 4.60E-02 |
| Smoc2         | 100289.06  | -0.51 | 0.25 | 2.88E-03 | 6.21E-02 |
| Ackr3         | 55531.47   | -0.51 | 0.19 | 7.37E-04 | 2.47E-02 |
| Prrg1         | 1612.77    | -0.51 | 0.27 | 3.62E-03 | 7.29E-02 |
| Gab1          | 2449.83    | -0.51 | 0.22 | 1.78E-03 | 4.45E-02 |
| Scg3          | 1603.36    | -0.51 | 0.29 | 4.70E-03 | 8.52E-02 |
| Syde2         | 2345.70    | -0.51 | 0.24 | 2.40E-03 | 5.47E-02 |
| Orc2          | 1197.96    | -0.51 | 0.22 | 1.43E-03 | 3.89E-02 |
| Pcolce2       | 37456.65   | -0.51 | 0.16 | 1.52E-04 | 7.53E-03 |
| Ccl11         | 50336.05   | -0.51 | 0.22 | 1.44E-03 | 3.91E-02 |
| Slc30a1       | 432.36     | -0.51 | 0.32 | 5.58E-03 | 9.51E-02 |
| Gnprnt1       | 10194.97   | -0.52 | 0.20 | 7.55E-04 | 2.51E-02 |
| Ahnak         | 24923.04   | -0.52 | 0.12 | 1.51E-06 | 1.88E-04 |
| Wnt11         | 6033.80    | -0.52 | 0.16 | 1.32E-04 | 6.75E-03 |
| Gm14440       | 684.26     | -0.52 | 0.32 | 5.50E-03 | 9.44E-02 |
| Pdzd2         | 1689.79    | -0.52 | 0.28 | 3.95E-03 | 7.70E-02 |
| 2610002M06Rik | 1531.68    | -0.52 | 0.21 | 9.29E-04 | 2.94E-02 |
| Lims2         | 8687.05    | -0.52 | 0.13 | 7.69E-06 | 7.50E-04 |
| Gstm1         | 64030.93   | -0.52 | 0.15 | 5.32E-05 | 3.46E-03 |
| Pla2r1        | 3369.80    | -0.52 | 0.21 | 9.46E-04 | 2.97E-02 |
| Kif13a        | 1555.97    | -0.53 | 0.25 | 2.22E-03 | 5.17E-02 |
| Scn7a         | 11455.60   | -0.53 | 0.23 | 1.69E-03 | 4.34E-02 |
| Ahctf1        | 2612.31    | -0.53 | 0.22 | 1.11E-03 | 3.28E-02 |
| Clip1         | 6490.13    | -0.53 | 0.19 | 3.55E-04 | 1.43E-02 |
| Ith5          | 33545.05   | -0.53 | 0.11 | 4.03E-07 | 6.37E-05 |
| Wdr3          | 1832.08    | -0.53 | 0.27 | 3.00E-03 | 6.40E-02 |
| Elmo1         | 1805.76    | -0.53 | 0.33 | 5.40E-03 | 9.35E-02 |
| Fndc1         | 90357.52   | -0.53 | 0.12 | 8.04E-07 | 1.12E-04 |
| Spry4         | 1026.41    | -0.53 | 0.34 | 5.76E-03 | 9.75E-02 |
| Esf1          | 1403.28    | -0.53 | 0.26 | 2.27E-03 | 5.26E-02 |
| Slco2b1       | 5076.27    | -0.54 | 0.28 | 3.09E-03 | 6.55E-02 |
| Kbtbd7        | 955.28     | -0.55 | 0.30 | 3.89E-03 | 7.63E-02 |
| Bmp6          | 2600.76    | -0.55 | 0.28 | 3.19E-03 | 6.71E-02 |
| Dennd4c       | 2264.41    | -0.55 | 0.30 | 3.77E-03 | 7.47E-02 |
| Acsl3         | 1492.08    | -0.55 | 0.24 | 1.73E-03 | 4.43E-02 |
| Uaca          | 2321.91    | -0.56 | 0.29 | 3.14E-03 | 6.62E-02 |
| Phka1         | 1373.21    | -0.56 | 0.27 | 2.45E-03 | 5.55E-02 |
| Lrrk2         | 1512.51    | -0.56 | 0.29 | 2.74E-03 | 6.01E-02 |
| Gm4631        | 3063.72    | -0.56 | 0.23 | 1.05E-03 | 3.17E-02 |
| Traf3         | 1121.01    | -0.56 | 0.35 | 5.02E-03 | 8.94E-02 |
| Taf7          | 1190.35    | -0.56 | 0.30 | 3.38E-03 | 6.92E-02 |
| Pdxk          | 5731.46    | -0.56 | 0.29 | 3.10E-03 | 6.55E-02 |
| Camk1d        | 1289.81    | -0.56 | 0.30 | 3.20E-03 | 6.72E-02 |
| Lrch1         | 1876.46    | -0.57 | 0.26 | 1.78E-03 | 4.45E-02 |
| Zeb1          | 4826.01    | -0.57 | 0.13 | 1.06E-06 | 1.40E-04 |
| Tbc1d32       | 641.27     | -0.57 | 0.37 | 5.38E-03 | 9.33E-02 |
| Fmd4a         | 1071.70    | -0.57 | 0.32 | 3.81E-03 | 7.51E-02 |
| Fyn           | 21200.95   | -0.57 | 0.12 | 1.34E-07 | 2.72E-05 |
| Zfp868        | 765.71     | -0.57 | 0.25 | 1.35E-03 | 3.75E-02 |
| Polr3e        | 1400.46    | -0.57 | 0.26 | 1.63E-03 | 4.21E-02 |
| Ankhd1        | 2277.74    | -0.57 | 0.18 | 1.17E-04 | 6.19E-03 |
| Krt18         | 1041.53    | -0.58 | 0.21 | 4.41E-04 | 1.67E-02 |
| Ppp1r12b      | 3259.10    | -0.58 | 0.20 | 2.51E-04 | 1.06E-02 |
| Flrt3         | 5211.26    | -0.59 | 0.20 | 2.25E-04 | 9.90E-03 |
| Tsc22d3       | 18982.36   | -0.59 | 0.19 | 1.22E-04 | 6.37E-03 |
| Abcb6         | 1165.49    | -0.59 | 0.25 | 1.09E-03 | 3.25E-02 |
| Abca2         | 2617.61    | -0.59 | 0.21 | 3.01E-04 | 1.24E-02 |
| 1810010H24Rik | 1044.67    | -0.59 | 0.18 | 7.81E-05 | 4.62E-03 |
| Golga4        | 2178.03    | -0.59 | 0.16 | 2.22E-05 | 1.72E-03 |
| Cdh13         | 4996.80    | -0.59 | 0.25 | 1.02E-03 | 3.13E-02 |
| Ephx4         | 863.01     | -0.60 | 0.25 | 1.03E-03 | 3.15E-02 |
| Zfp955a       | 976.57     | -0.60 | 0.29 | 2.09E-03 | 4.99E-02 |
| Zfp385a       | 6907.01    | -0.60 | 0.13 | 1.65E-07 | 3.18E-05 |
| Phf3          | 1702.62    | -0.60 | 0.23 | 5.94E-04 | 2.11E-02 |
| Synj1         | 1218.12    | -0.60 | 0.27 | 1.38E-03 | 3.81E-02 |
| Rif1          | 889.30     | -0.60 | 0.37 | 4.50E-03 | 8.32E-02 |
| Abilm1        | 20042.96   | -0.60 | 0.18 | 4.08E-05 | 2.81E-03 |
| Nr1d1         | 12222.90   | -0.60 | 0.21 | 3.06E-04 | 1.25E-02 |
| Abca5         | 1545.92    | -0.61 | 0.26 | 1.19E-03 | 3.43E-02 |
| Nipbl         | 1531.79    | -0.61 | 0.20 | 1.71E-04 | 8.19E-03 |
| Cadm3         | 1363.62    | -0.61 | 0.24 | 7.48E-04 | 2.50E-02 |
| Dpp4          | 26082.45   | -0.61 | 0.37 | 4.41E-03 | 8.24E-02 |
| Enpp2         | 22285.76   | -0.61 | 0.19 | 9.75E-05 | 5.38E-03 |
| Prdm8         | 1776.28    | -0.61 | 0.26 | 1.03E-03 | 3.16E-02 |
| Lox4          | 1695.19    | -0.61 | 0.28 | 1.48E-03 | 3.97E-02 |
| Dact1         | 16457.39   | -0.61 | 0.16 | 6.46E-06 | 6.48E-04 |
| Colgalt2      | 1811.50    | -0.62 | 0.30 | 2.03E-03 | 4.92E-02 |
| Slc25a23      | 907.24     | -0.62 | 0.34 | 3.27E-03 | 6.80E-02 |
| Ercc8l2       | 1221.07    | -0.62 | 0.30 | 2.12E-03 | 5.03E-02 |
| Lama2         | 18588.46   | -0.62 | 0.12 | 2.42E-08 | 5.56E-06 |
| Podn          | 10508.55   | -0.62 | 0.24 | 6.01E-04 | 2.13E-02 |
| Ifit2         | 3491.29    | -0.63 | 0.19 | 7.94E-05 | 4.67E-03 |
| Dennd1a       | 1521.17    | -0.63 | 0.20 | 1.41E-04 | 7.08E-03 |
| Tmod2         | 3417.99    | -0.63 | 0.14 | 5.40E-07 | 8.10E-05 |
| Aif1l         | 5671.49    | -0.63 | 0.39 | 4.64E-03 | 8.43E-02 |
| Islr2         | 872.54     | -0.63 | 0.25 | 7.52E-04 | 2.51E-02 |
| Zfp53         | 870.41     | -0.64 | 0.31 | 1.98E-03 | 4.81E-02 |
| Fgf2          | 4025.38    | -0.64 | 0.28 | 1.16E-03 | 3.37E-02 |

|               |          |       |      |          |          |
|---------------|----------|-------|------|----------|----------|
| Trim16        | 2871.42  | -0.64 | 0.19 | 3.75E-05 | 2.61E-03 |
| Lamc2         | 2650.22  | -0.64 | 0.25 | 6.45E-04 | 2.24E-02 |
| Kln1          | 3008.93  | -0.65 | 0.20 | 8.09E-05 | 4.72E-03 |
| Osr2          | 4863.96  | -0.65 | 0.32 | 2.25E-03 | 5.21E-02 |
| Man1a         | 31081.11 | -0.65 | 0.14 | 6.07E-07 | 8.92E-05 |
| Nr3c2         | 465.18   | -0.65 | 0.43 | 4.81E-03 | 8.66E-02 |
| Timp3         | 59678.93 | -0.65 | 0.13 | 2.07E-08 | 4.91E-06 |
| Zfp292        | 1262.74  | -0.65 | 0.41 | 4.40E-03 | 8.24E-02 |
| Tgfb3         | 28989.66 | -0.65 | 0.12 | 9.46E-09 | 2.45E-06 |
| Wdr11         | 2717.73  | -0.66 | 0.23 | 2.39E-04 | 1.02E-02 |
| Smc3          | 4212.33  | -0.66 | 0.24 | 4.27E-04 | 1.65E-02 |
| Nqo1          | 659.83   | -0.66 | 0.33 | 2.24E-03 | 5.21E-02 |
| Smad5         | 4082.14  | -0.66 | 0.19 | 3.77E-05 | 2.61E-03 |
| Ptprj         | 1472.45  | -0.66 | 0.28 | 1.05E-03 | 3.17E-02 |
| Nol8          | 476.96   | -0.66 | 0.44 | 4.83E-03 | 8.66E-02 |
| Entpd1        | 2728.79  | -0.67 | 0.17 | 7.38E-06 | 7.25E-04 |
| Ppip5k1       | 928.84   | -0.67 | 0.25 | 3.99E-04 | 1.57E-02 |
| Abca6         | 7641.78  | -0.68 | 0.22 | 1.72E-04 | 8.19E-03 |
| Samhd1        | 3214.88  | -0.69 | 0.18 | 7.33E-06 | 7.25E-04 |
| Iiga11        | 14200.04 | -0.69 | 0.23 | 1.97E-04 | 9.07E-03 |
| Ankrd12       | 3229.42  | -0.69 | 0.36 | 2.52E-03 | 5.67E-02 |
| Cwrf19l2      | 1403.88  | -0.69 | 0.26 | 4.38E-04 | 1.67E-02 |
| Omd           | 2305.87  | -0.69 | 0.22 | 8.44E-05 | 4.85E-03 |
| Rock2         | 7769.65  | -0.70 | 0.19 | 1.72E-05 | 1.43E-03 |
| Ebf2          | 8943.34  | -0.70 | 0.19 | 1.65E-05 | 1.39E-03 |
| Pcsk6         | 32154.66 | -0.70 | 0.21 | 4.72E-05 | 3.16E-03 |
| Gcnt3         | 490.37   | -0.70 | 0.50 | 5.14E-03 | 9.08E-02 |
| Heatr5b       | 1226.80  | -0.70 | 0.26 | 4.33E-04 | 1.66E-02 |
| Emx2          | 784.06   | -0.70 | 0.41 | 3.41E-03 | 6.95E-02 |
| Abca8b        | 4709.18  | -0.70 | 0.46 | 4.44E-03 | 8.27E-02 |
| Adam33        | 2974.53  | -0.70 | 0.16 | 6.44E-07 | 9.36E-05 |
| Rabep1        | 3135.64  | -0.71 | 0.24 | 1.92E-04 | 8.89E-03 |
| Icosl         | 1930.18  | -0.71 | 0.37 | 2.32E-03 | 5.36E-02 |
| Fgl2          | 32630.28 | -0.71 | 0.32 | 1.58E-03 | 4.15E-02 |
| Bdh1          | 436.52   | -0.71 | 0.53 | 5.33E-03 | 9.30E-02 |
| Rorb          | 791.26   | -0.72 | 0.27 | 4.57E-04 | 1.73E-02 |
| Etv1          | 533.06   | -0.72 | 0.46 | 3.99E-03 | 7.73E-02 |
| Galnt15       | 5323.68  | -0.72 | 0.24 | 1.49E-04 | 7.43E-03 |
| Car2          | 2904.87  | -0.73 | 0.56 | 5.61E-03 | 9.54E-02 |
| Bmp2k         | 743.00   | -0.73 | 0.27 | 3.67E-04 | 1.48E-02 |
| Farp2         | 859.40   | -0.73 | 0.38 | 2.28E-03 | 5.26E-02 |
| Tpr           | 4645.72  | -0.74 | 0.22 | 4.45E-05 | 3.02E-03 |
| Gpr165        | 424.96   | -0.74 | 0.34 | 1.45E-03 | 3.91E-02 |
| Hao2          | 852.85   | -0.74 | 0.58 | 5.66E-03 | 9.60E-02 |
| Adam22        | 828.42   | -0.74 | 0.36 | 1.84E-03 | 4.56E-02 |
| Zfp229        | 581.46   | -0.74 | 0.55 | 5.16E-03 | 9.10E-02 |
| Tmtc3         | 2660.19  | -0.75 | 0.26 | 2.02E-04 | 9.23E-03 |
| Creb5         | 4133.88  | -0.77 | 0.20 | 9.56E-06 | 8.99E-04 |
| Zfp638        | 3204.02  | -0.77 | 0.24 | 8.84E-05 | 5.04E-03 |
| Sclt1         | 893.19   | -0.78 | 0.30 | 4.32E-04 | 1.66E-02 |
| Tspan15       | 551.04   | -0.78 | 0.57 | 4.90E-03 | 8.77E-02 |
| Pcgf5         | 1061.96  | -0.79 | 0.31 | 5.92E-04 | 2.11E-02 |
| Abca8a        | 29666.54 | -0.79 | 0.21 | 1.36E-05 | 1.21E-03 |
| Cldn3         | 1010.29  | -0.79 | 0.32 | 6.62E-04 | 2.27E-02 |
| Zfp518a       | 649.22   | -0.80 | 0.42 | 2.19E-03 | 5.13E-02 |
| Dkk2          | 1719.19  | -0.80 | 0.30 | 3.92E-04 | 1.55E-02 |
| Stxbp6        | 5216.40  | -0.80 | 0.26 | 1.09E-04 | 5.88E-03 |
| 2610528A11Rik | 459.96   | -0.80 | 0.53 | 4.04E-03 | 7.79E-02 |
| Fam208b       | 1492.67  | -0.81 | 0.59 | 4.76E-03 | 8.60E-02 |
| Gm3055        | 540.28   | -0.81 | 0.39 | 1.51E-03 | 4.02E-02 |
| Klf12         | 444.43   | -0.82 | 0.37 | 1.26E-03 | 3.58E-02 |
| Epcam         | 3562.61  | -0.82 | 0.51 | 3.64E-03 | 7.31E-02 |
| Gk5           | 823.91   | -0.82 | 0.20 | 2.51E-06 | 2.81E-04 |
| Musk          | 917.16   | -0.82 | 0.43 | 2.11E-03 | 5.01E-02 |
| Rgmb          | 11295.26 | -0.82 | 0.18 | 4.64E-07 | 7.03E-05 |
| Crispld1      | 3286.90  | -0.83 | 0.27 | 1.29E-04 | 6.67E-03 |
| Sdr42e1       | 447.57   | -0.83 | 0.33 | 5.95E-04 | 2.11E-02 |
| Ptprd         | 1124.61  | -0.84 | 0.42 | 1.77E-03 | 4.44E-02 |
| Sult1d1       | 1197.91  | -0.84 | 0.42 | 1.80E-03 | 4.49E-02 |
| Gnao1         | 260.59   | -0.85 | 0.50 | 3.06E-03 | 6.49E-02 |
| Sos1          | 1421.84  | -0.85 | 0.29 | 1.83E-04 | 8.56E-03 |
| Krt80         | 1244.70  | -0.86 | 0.36 | 7.57E-04 | 2.51E-02 |
| Msh2          | 1338.99  | -0.87 | 0.24 | 2.11E-05 | 1.68E-03 |
| Lepr          | 6633.70  | -0.89 | 0.29 | 1.29E-04 | 6.67E-03 |
| Hip1r         | 900.06   | -0.93 | 0.47 | 1.74E-03 | 4.43E-02 |
| Fsd1l         | 676.71   | -0.93 | 0.55 | 2.88E-03 | 6.21E-02 |
| Msh3          | 454.02   | -0.94 | 0.49 | 2.08E-03 | 4.98E-02 |
| Prokr1        | 2423.11  | -0.97 | 0.22 | 1.02E-06 | 1.36E-04 |
| Cnmd          | 1004.93  | -0.97 | 0.39 | 5.33E-04 | 1.95E-02 |
| Omd           | 2194.27  | -0.98 | 0.40 | 5.87E-04 | 2.10E-02 |
| Ptgifr        | 2624.62  | -0.99 | 0.35 | 2.48E-04 | 1.06E-02 |
| Nr1d2         | 11042.81 | -1.00 | 0.31 | 7.44E-05 | 4.47E-03 |
| Akr1c12       | 562.37   | -1.03 | 0.66 | 3.33E-03 | 6.87E-02 |
| Eea1          | 2372.99  | -1.03 | 0.22 | 2.45E-07 | 4.42E-05 |
| Negr1         | 709.92   | -1.03 | 0.42 | 6.20E-04 | 2.17E-02 |
| Zc3h6         | 454.03   | -1.04 | 0.75 | 4.05E-03 | 7.79E-02 |
| Sarm1         | 269.91   | -1.04 | 0.47 | 1.07E-03 | 3.21E-02 |
| Chml          | 294.41   | -1.06 | 0.49 | 1.19E-03 | 3.43E-02 |
| Prkaa2        | 588.22   | -1.07 | 0.30 | 1.59E-05 | 1.37E-03 |
| Sntb1         | 2387.69  | -1.08 | 0.35 | 1.12E-04 | 6.03E-03 |
| Pcdh9         | 223.85   | -1.10 | 0.56 | 1.77E-03 | 4.44E-02 |
| Moxd1         | 551.30   | -1.11 | 0.71 | 3.26E-03 | 6.77E-02 |
| Arhgef28      | 909.26   | -1.11 | 0.57 | 1.76E-03 | 4.44E-02 |
| Ppp1r1b       | 514.01   | -1.13 | 0.33 | 2.69E-05 | 1.99E-03 |
| Gm33869       | 133.91   | -1.14 | 0.81 | 3.78E-03 | 7.48E-02 |
| Hspa4l        | 1270.59  | -1.15 | 0.36 | 8.36E-05 | 4.83E-03 |
| Ppl           | 3961.16  | -1.15 | 0.39 | 1.74E-04 | 8.25E-03 |
| Duox1         | 2001.45  | -1.16 | 0.39 | 1.50E-04 | 7.43E-03 |
| Oit1          | 757.26   | -1.17 | 0.39 | 1.32E-04 | 6.75E-03 |
| Bicd1         | 438.89   | -1.18 | 0.71 | 2.73E-03 | 6.00E-02 |
| Adh7          | 426.52   | -1.18 | 0.42 | 2.51E-04 | 1.06E-02 |
| Sgpp2         | 227.32   | -1.20 | 1.23 | 5.45E-03 | 9.40E-02 |



|               |         |        |      |          |          |
|---------------|---------|--------|------|----------|----------|
| Ackr2         | 2852.51 | -1.23  | 0.20 | 6.47E-11 | 2.79E-08 |
| Pigr          | 3591.99 | -1.24  | 0.29 | 1.17E-06 | 1.51E-04 |
| Lrba          | 198.34  | -1.24  | 0.49 | 4.88E-04 | 1.83E-02 |
| Akr1c13       | 848.97  | -1.26  | 0.34 | 1.27E-05 | 1.14E-03 |
| Sema3a        | 953.29  | -1.28  | 0.29 | 9.65E-07 | 1.30E-04 |
| Tmprss2       | 667.27  | -1.39  | 0.56 | 5.50E-04 | 1.99E-02 |
| Ap5b1         | 231.60  | -1.40  | 0.68 | 1.47E-03 | 3.95E-02 |
| Hif           | 2948.16 | -1.43  | 0.40 | 2.16E-05 | 1.70E-03 |
| Igfb9b        | 215.18  | -1.44  | 0.63 | 9.10E-04 | 2.91E-02 |
| Kcne3         | 337.10  | -1.57  | 0.48 | 5.21E-05 | 3.42E-03 |
| Sucnr1        | 164.28  | -1.59  | 0.63 | 5.23E-04 | 1.93E-02 |
| 2610021A01Rik | 607.76  | -1.60  | 0.48 | 4.39E-05 | 2.99E-03 |
| Akr1c19       | 1112.23 | -1.67  | 0.46 | 1.89E-05 | 1.54E-03 |
| Tll1          | 214.92  | -1.93  | 0.45 | 1.65E-06 | 2.02E-04 |
| Gm28035       | 34.53   | -2.27  | 1.25 | 2.62E-03 | 5.84E-02 |
| Zfp976        | 418.09  | -2.40  | 0.79 | 1.57E-04 | 7.71E-03 |
| Prdm9         | 112.64  | -2.41  | 0.94 | 4.82E-04 | 1.81E-02 |
| Aldh1a7       | 49.89   | -2.46  | 1.54 | 3.21E-03 | 6.72E-02 |
| Kl            | 23.95   | -2.65  | 1.43 | 2.64E-03 | 5.87E-02 |
| Exd1          | 130.02  | -2.69  | 0.82 | 6.34E-05 | 3.94E-03 |
| Sifn4         | 68.66   | -2.75  | 2.12 | 3.99E-03 | 7.73E-02 |
| Mlip          | 118.90  | -2.88  | 1.42 | 2.39E-03 | 5.47E-02 |
| Atp2a1        | 151.27  | -2.88  | 1.04 | 2.95E-04 | 1.22E-02 |
| Mrgprg        | 4094.30 | -2.88  | 1.02 | 2.76E-04 | 1.16E-02 |
| 9330159F19Rik | 720.64  | -3.13  | 1.36 | 9.28E-04 | 2.94E-02 |
| Cyfp2         | 112.16  | -3.49  | 4.87 | 4.19E-03 | 7.95E-02 |
| Trim66        | 66.69   | -3.52  | 0.94 | 2.28E-05 | 1.72E-03 |
| Ttc39a        | 149.16  | -3.60  | 2.01 | 1.65E-03 | 4.27E-02 |
| Gabra2        | 32.12   | -3.81  | 1.29 | 3.86E-04 | 1.53E-02 |
| Fyb2          | 90.07   | -4.37  | 5.11 | 3.00E-03 | 6.40E-02 |
| Ang4          | 707.31  | -4.38  | 1.10 | 8.33E-06 | 8.07E-04 |
| Kcnq1         | 188.77  | -4.39  | 1.37 | 4.71E-05 | 3.16E-03 |
| Noxa1         | 102.07  | -4.68  | 2.82 | 1.19E-03 | 3.43E-02 |
| Ccdc89        | 50.65   | -4.80  | 2.52 | 8.42E-04 | 2.72E-02 |
| Myh4          | 93.71   | -4.84  | 1.18 | 3.13E-05 | 2.24E-03 |
| Nyap1         | 25.42   | -4.85  | 1.54 | 2.48E-04 | 1.06E-02 |
| Cacna1h       | 28.77   | -6.07  | 1.73 | 9.38E-05 | 5.26E-03 |
| BC016579      | 37.56   | -6.45  | 1.80 | 2.26E-05 | 1.72E-03 |
| Ifi206        | 77.21   | -7.57  | 1.60 | 7.68E-08 | 1.68E-05 |
| Gprin3        | 23.99   | -8.74  | 3.23 | 5.76E-05 | 3.68E-03 |
| Pkd1l2        | 39.48   | -9.43  | 3.13 | 1.39E-06 | 1.79E-04 |
| Rundc3b       | 44.12   | -10.09 | 3.07 | 7.76E-09 | 2.09E-06 |
