# Supplementary material for: Elucidating the fundamental fibrotic processes driving abdominal adhesion formation
Source: PubMed Central journal article supplement (PMC7426428; doi:10.1038/s41467-020-17883-1), 2020-08-13
Supplement: 41467_2020_17883_MOESM4_ESM.pdf [file 41467_2020_17883_MOESM4_ESM.pdf]

**Supplementary Dataset 2: Genes differentially expressed between human fibroblasts isolated from abdominal adhesions ('Adhesions') versus control peritoneum tissue ('Healthy') by DESeq2**

This workbook contains one sheet:

**Sheet 1:** Table of differentially expressed genes between human fibroblasts isolated from abdominal adhesions ( $n = 6$  samples) and control peritoneal tissue ( $n = 3$  samples) after performing lfcShrink using Approximate Posterior Estimation for GLM (apeglm) in DESeq2. A significance threshold of  $P\text{-adjusted} < 0.1$  was used to filter genes. Positive  $\log_2\text{FoldChange}$  values correspond to genes significantly enriched in abdominal adhesions compared to healthy controls.

| GeneID   | baseMean   | log2FoldChange | lfcSE | pvalue   | padj     |
|----------|------------|----------------|-------|----------|----------|
| TBC1D3D  | 66.57      | 10.21          | 3.06  | 1.56E-11 | 7.02E-09 |
| ALPK2    | 321.19     | 6.11           | 1.04  | 4.59E-11 | 1.85E-08 |
| KLF17    | 23.39      | 6.07           | 1.71  | 9.93E-06 | 4.55E-04 |
| DLL3     | 6.62       | 5.85           | 2.78  | 9.88E-05 | 2.49E-03 |
| GUCA1A   | 36.02      | 5.48           | 1.37  | 3.23E-06 | 1.97E-04 |
| MAB21L2  | 1003.01    | 5.36           | 1.04  | 2.26E-09 | 5.42E-07 |
| PTPN22   | 2468.02    | 5.21           | 1.04  | 6.28E-09 | 1.32E-06 |
| LRRN1    | 7966.96    | 5.13           | 1.11  | 3.22E-08 | 5.04E-06 |
| EPN3     | 56.70      | 4.87           | 1.27  | 2.23E-06 | 1.47E-04 |
| GJB2     | 2655.17    | 4.85           | 0.80  | 1.45E-11 | 6.80E-09 |
| IGDCC3   | 54.14      | 4.84           | 0.86  | 6.00E-10 | 1.61E-07 |
| PROC     | 9.41       | 4.76           | 1.44  | 4.15E-05 | 1.33E-03 |
| EVI2A    | 1131.46    | 4.68           | 0.79  | 3.91E-11 | 1.67E-08 |
| TNFRSF9  | 906.51     | 4.59           | 0.96  | 2.05E-08 | 3.50E-06 |
| IL21R    | 275.54     | 4.57           | 1.16  | 8.58E-07 | 7.11E-05 |
| SLC12A8  | 4130.34    | 4.46           | 1.02  | 1.32E-07 | 1.63E-05 |
| IQGAP2   | 845.26     | 4.17           | 1.12  | 2.15E-06 | 1.43E-04 |
| C19orf81 | 10.69      | 3.94           | 1.47  | 4.23E-04 | 7.21E-03 |
| ADAM12   | 13955.97   | 3.91           | 1.10  | 4.31E-06 | 2.46E-04 |
| ADD2     | 1882.55    | 3.77           | 1.08  | 5.52E-06 | 2.90E-04 |
| F2RL2    | 506.88     | 3.75           | 1.10  | 8.22E-06 | 3.98E-04 |
| ACSBG2   | 12.97      | 3.54           | 1.42  | 3.64E-04 | 6.51E-03 |
| CD22     | 102.78     | 3.53           | 1.11  | 2.17E-05 | 8.05E-04 |
| SDC1     | 1898.33    | 3.51           | 0.84  | 4.93E-07 | 4.56E-05 |
| SAMD5    | 149.14     | 3.47           | 0.81  | 3.48E-07 | 3.56E-05 |
| SPTSSB   | 92.79      | 3.46           | 1.25  | 6.52E-05 | 1.87E-03 |
| C1QTNF6  | 11609.83   | 3.45           | 0.70  | 1.46E-08 | 2.61E-06 |
| ATP1B1   | 5355.55    | 3.44           | 0.81  | 3.16E-07 | 3.41E-05 |
| STRA6    | 2322.68    | 3.42           | 1.01  | 9.00E-06 | 4.25E-04 |
| SAMD3    | 113.80     | 3.31           | 1.07  | 2.96E-05 | 1.03E-03 |
| NLRP2    | 25.59      | 3.30           | 1.10  | 6.18E-05 | 1.79E-03 |
| KLK13    | 16.53      | 3.29           | 1.03  | 5.16E-05 | 1.56E-03 |
| C3orf80  | 1970.33    | 3.24           | 0.98  | 1.31E-05 | 5.54E-04 |
| PLEKHN1  | 95.54      | 3.23           | 0.77  | 6.22E-07 | 5.49E-05 |
| SMTNL2   | 2806.46    | 3.21           | 1.11  | 4.56E-05 | 1.42E-03 |
| COL24A1  | 1734.84    | 3.18           | 0.82  | 1.71E-06 | 1.23E-04 |
| COL1A1   | 6550287.27 | 3.17           | 0.81  | 1.60E-06 | 1.17E-04 |
| PRSS35   | 1230.38    | 3.17           | 0.95  | 1.28E-05 | 5.47E-04 |
| SHANK1   | 25.61      | 3.11           | 1.36  | 3.51E-04 | 6.37E-03 |
| COL3A1   | 4484053.61 | 3.02           | 0.98  | 2.79E-05 | 9.87E-04 |
| GCNT1    | 986.16     | 3.02           | 0.38  | 5.06E-17 | 9.70E-14 |
| KIF26B   | 637.99     | 2.99           | 0.70  | 3.46E-07 | 3.56E-05 |
| SLC38A5  | 1342.90    | 2.98           | 0.95  | 2.53E-05 | 9.19E-04 |
| DEF6     | 563.53     | 2.98           | 0.93  | 2.15E-05 | 8.04E-04 |
| ADAMTS14 | 4752.23    | 2.93           | 0.96  | 3.44E-05 | 1.15E-03 |
| CILP2    | 9323.87    | 2.91           | 1.01  | 5.52E-05 | 1.64E-03 |
| RUNX2    | 1359.05    | 2.90           | 0.45  | 2.87E-12 | 1.84E-09 |
| NEDD4L   | 1137.38    | 2.87           | 1.15  | 1.58E-04 | 3.53E-03 |
| CDH2     | 1169.11    | 2.86           | 1.03  | 7.67E-05 | 2.09E-03 |
| SIT1     | 52.65      | 2.85           | 1.30  | 3.60E-04 | 6.46E-03 |
| EVA1A    | 501.97     | 2.79           | 0.60  | 6.95E-08 | 9.33E-06 |
| ZNF114   | 65.74      | 2.77           | 0.46  | 7.78E-11 | 2.71E-08 |
| KERA     | 593.34     | 2.73           | 1.27  | 3.44E-04 | 6.28E-03 |
| DUSP4    | 1113.19    | 2.72           | 0.81  | 1.41E-05 | 5.84E-04 |
| GSDMA    | 136.43     | 2.72           | 1.13  | 2.20E-04 | 4.51E-03 |
| CDC45    | 97.73      | 2.70           | 1.28  | 4.16E-04 | 7.12E-03 |
| CSTA     | 379.21     | 2.69           | 1.00  | 1.10E-04 | 2.69E-03 |
| TEX35    | 21.18      | 2.67           | 1.31  | 7.02E-04 | 1.02E-02 |
| OCIAD2   | 598.14     | 2.66           | 0.87  | 3.71E-05 | 1.21E-03 |
| PODNL1   | 2008.76    | 2.66           | 0.62  | 4.79E-07 | 4.45E-05 |
| SELL     | 535.46     | 2.64           | 1.30  | 4.54E-04 | 7.59E-03 |
| ST6GAL2  | 2365.09    | 2.63           | 1.09  | 2.16E-04 | 4.45E-03 |
| MCTP2    | 953.46     | 2.63           | 0.73  | 7.09E-06 | 3.54E-04 |
| CXCL5    | 107.77     | 2.61           | 1.12  | 2.76E-04 | 5.36E-03 |
| RAC3     | 43.33      | 2.61           | 1.22  | 4.56E-04 | 7.60E-03 |
| TNFRSF18 | 105.54     | 2.61           | 1.28  | 4.86E-04 | 7.92E-03 |
| COL26A1  | 283.75     | 2.60           | 1.30  | 5.05E-04 | 8.10E-03 |
| ENC1     | 2490.33    | 2.59           | 0.91  | 7.07E-05 | 1.99E-03 |
| NAT8L    | 9.15       | 2.59           | 1.49  | 2.01E-03 | 2.14E-02 |
| IQCA1    | 688.06     | 2.59           | 0.84  | 3.60E-05 | 1.19E-03 |
| CNIH2    | 38.22      | 2.57           | 1.26  | 5.96E-04 | 9.06E-03 |
| B3GALT2  | 70.74      | 2.55           | 0.97  | 1.60E-04 | 3.57E-03 |
| PCDH7    | 7153.62    | 2.54           | 0.76  | 1.62E-05 | 6.48E-04 |
| CRABP2   | 31273.44   | 2.51           | 0.65  | 2.83E-06 | 1.76E-04 |
| DGKI     | 538.88     | 2.50           | 0.70  | 8.67E-06 | 4.12E-04 |
| IL4I1    | 571.39     | 2.49           | 1.28  | 5.78E-04 | 8.94E-03 |
| CLNK     | 46.00      | 2.48           | 1.34  | 8.13E-04 | 1.13E-02 |
| COMP     | 45407.23   | 2.45           | 0.95  | 1.66E-04 | 3.68E-03 |
| PNPLA3   | 39.50      | 2.43           | 0.71  | 1.82E-05 | 7.06E-04 |
| GALNT5   | 2486.19    | 2.41           | 1.24  | 6.00E-04 | 9.08E-03 |
| P4HA3    | 6227.88    | 2.40           | 1.06  | 3.25E-04 | 6.00E-03 |
| NEFH     | 205.10     | 2.39           | 1.07  | 3.81E-04 | 6.71E-03 |
| SPARC    | 1797901.02 | 2.38           | 0.58  | 9.56E-07 | 7.63E-05 |
| LCTL     | 139.68     | 2.38           | 0.86  | 1.11E-04 | 2.69E-03 |
| SLN      | 151.92     | 2.38           | 1.05  | 3.59E-04 | 6.44E-03 |
| MEX3A    | 113.75     | 2.38           | 0.66  | 8.68E-06 | 4.12E-04 |
| COL5A1   | 112579.09  | 2.37           | 0.73  | 2.54E-05 | 9.20E-04 |
| FSCN1    | 9092.52    | 2.35           | 0.55  | 4.65E-07 | 4.40E-05 |
| F2R      | 11380.17   | 2.33           | 0.88  | 1.51E-04 | 3.42E-03 |
| CLEC11A  | 12166.07   | 2.30           | 0.43  | 3.71E-09 | 8.36E-07 |
| FAM151B  | 222.71     | 2.28           | 0.44  | 6.60E-09 | 1.35E-06 |
| PYCR1    | 7232.42    | 2.27           | 0.78  | 7.61E-05 | 2.09E-03 |
| KIAA2012 | 112.80     | 2.26           | 0.29  | 9.12E-17 | 1.55E-13 |
| CCDC102B | 4013.39    | 2.26           | 0.79  | 8.54E-05 | 2.22E-03 |
| PHEX     | 166.87     | 2.25           | 0.83  | 1.37E-04 | 3.15E-03 |

|            |          |      |      |          |          |
|------------|----------|------|------|----------|----------|
| VSNL1      | 926.75   | 2.24 | 1.09 | 5.55E-04 | 8.68E-03 |
| SFT2D3     | 331.90   | 2.24 | 0.81 | 1.18E-04 | 2.81E-03 |
| KCNAB3     | 84.31    | 2.24 | 1.01 | 4.76E-04 | 7.81E-03 |
| CDC25C     | 43.30    | 2.21 | 1.21 | 9.58E-04 | 1.27E-02 |
| RRM2       | 852.94   | 2.20 | 1.26 | 9.37E-04 | 1.25E-02 |
| KIF4A      | 199.80   | 2.19 | 0.98 | 4.23E-04 | 7.21E-03 |
| CDCA3      | 242.50   | 2.19 | 0.55 | 1.86E-06 | 1.29E-04 |
| PKP2       | 2108.08  | 2.19 | 0.92 | 3.00E-04 | 5.66E-03 |
| ZNF469     | 1961.94  | 2.19 | 0.52 | 8.03E-07 | 6.77E-05 |
| ARL9       | 70.98    | 2.18 | 0.71 | 5.41E-05 | 1.61E-03 |
| LIMD2      | 1381.64  | 2.17 | 0.85 | 2.00E-04 | 4.26E-03 |
| CEM1P      | 475.12   | 2.16 | 1.07 | 6.41E-04 | 9.54E-03 |
| PRAG1      | 142.53   | 2.15 | 1.18 | 9.21E-04 | 1.24E-02 |
| GYG2       | 282.45   | 2.14 | 0.55 | 2.71E-06 | 1.72E-04 |
| PSD        | 1025.14  | 2.14 | 0.71 | 6.12E-05 | 1.78E-03 |
| GRIA3      | 1211.17  | 2.12 | 1.07 | 6.80E-04 | 1.00E-02 |
| RM12       | 462.80   | 2.11 | 0.33 | 9.57E-12 | 5.24E-09 |
| DNAH14     | 203.64   | 2.10 | 0.74 | 1.08E-04 | 2.66E-03 |
| SERINC5    | 2915.57  | 2.10 | 0.59 | 1.09E-05 | 4.89E-04 |
| DNAJC12    | 572.21   | 2.10 | 0.49 | 5.02E-07 | 4.59E-05 |
| FGD6       | 1046.63  | 2.09 | 0.52 | 1.75E-06 | 1.25E-04 |
| KIF2C      | 228.16   | 2.08 | 0.89 | 3.78E-04 | 6.69E-03 |
| OSBPL3     | 1513.19  | 2.07 | 0.50 | 1.11E-06 | 8.67E-05 |
| QPR1       | 1386.28  | 2.06 | 0.68 | 5.81E-05 | 1.70E-03 |
| TRIM59     | 423.24   | 2.06 | 0.60 | 1.68E-05 | 6.68E-04 |
| SPON1      | 41874.28 | 2.05 | 0.97 | 5.78E-04 | 8.94E-03 |
| LXN        | 9088.58  | 2.05 | 0.91 | 4.72E-04 | 7.77E-03 |
| B4GALNT3   | 253.77   | 2.04 | 1.15 | 1.06E-03 | 1.37E-02 |
| ANXA13     | 47.26    | 2.04 | 1.11 | 1.09E-03 | 1.40E-02 |
| CBX8       | 384.30   | 2.03 | 0.65 | 4.87E-05 | 1.49E-03 |
| KCNK6      | 1237.14  | 2.02 | 0.62 | 2.88E-05 | 1.01E-03 |
| PCLAF      | 322.89   | 2.00 | 1.03 | 8.38E-04 | 1.15E-02 |
| ENTFD7     | 847.10   | 2.00 | 0.57 | 1.21E-05 | 5.23E-04 |
| CSMD2      | 843.48   | 1.99 | 0.51 | 2.90E-06 | 1.80E-04 |
| SMCO2      | 12.42    | 1.99 | 1.35 | 2.53E-03 | 2.53E-02 |
| COL5A2     | 74425.44 | 1.99 | 0.74 | 1.66E-04 | 3.68E-03 |
| SLC17A9    | 1249.57  | 1.96 | 0.55 | 1.14E-05 | 5.00E-04 |
| KIAA1211   | 157.85   | 1.94 | 1.06 | 1.06E-03 | 1.37E-02 |
| PRR7       | 316.22   | 1.92 | 0.55 | 1.47E-05 | 6.03E-04 |
| PTGER1     | 187.99   | 1.91 | 0.93 | 7.58E-04 | 1.07E-02 |
| PKIA       | 2153.68  | 1.91 | 0.44 | 4.17E-07 | 4.13E-05 |
| CDKN2A     | 1045.67  | 1.90 | 1.04 | 1.04E-03 | 1.36E-02 |
| NRK        | 1191.07  | 1.90 | 0.69 | 1.53E-04 | 3.45E-03 |
| CCNE1      | 207.37   | 1.88 | 0.55 | 2.06E-05 | 7.78E-04 |
| DEPDC7     | 447.07   | 1.88 | 0.42 | 2.53E-07 | 2.92E-05 |
| BMF        | 633.34   | 1.88 | 0.32 | 2.51E-10 | 7.71E-08 |
| SSX2IP     | 1299.68  | 1.87 | 0.37 | 1.31E-08 | 2.38E-06 |
| UNC5B      | 4372.79  | 1.86 | 0.50 | 5.85E-06 | 3.03E-04 |
| PLK4       | 202.52   | 1.85 | 0.50 | 6.81E-06 | 3.41E-04 |
| HMGB3      | 569.31   | 1.84 | 0.81 | 5.03E-04 | 8.08E-03 |
| RHBDL2     | 163.95   | 1.84 | 0.58 | 4.79E-05 | 1.47E-03 |
| NRCAM      | 168.84   | 1.84 | 1.01 | 1.19E-03 | 1.48E-02 |
| NFE2       | 70.98    | 1.83 | 1.54 | 2.38E-03 | 2.42E-02 |
| FAP        | 14186.15 | 1.83 | 0.70 | 2.26E-04 | 4.60E-03 |
| TTYH3      | 5373.07  | 1.83 | 0.63 | 1.05E-04 | 2.59E-03 |
| MICB       | 172.98   | 1.82 | 0.78 | 4.75E-04 | 7.81E-03 |
| C10TNF12   | 139.85   | 1.81 | 1.29 | 1.99E-03 | 2.13E-02 |
| KDEL3      | 13867.14 | 1.80 | 0.77 | 4.25E-04 | 7.22E-03 |
| LRRCB8E    | 560.49   | 1.80 | 0.95 | 1.08E-03 | 1.39E-02 |
| ZNF474     | 46.56    | 1.79 | 0.80 | 6.71E-04 | 9.95E-03 |
| TRIB2      | 3829.80  | 1.79 | 0.56 | 4.59E-05 | 1.43E-03 |
| ST6GALNAC5 | 344.90   | 1.79 | 0.97 | 1.21E-03 | 1.50E-02 |
| PLOD2      | 16341.55 | 1.78 | 0.89 | 8.99E-04 | 1.22E-02 |
| SEMA5A     | 4900.60  | 1.77 | 0.31 | 5.45E-10 | 1.49E-07 |
| NUSAP1     | 645.71   | 1.77 | 1.02 | 1.40E-03 | 1.66E-02 |
| GN2        | 6122.31  | 1.76 | 0.65 | 1.97E-04 | 4.22E-03 |
| NREP       | 14634.97 | 1.76 | 0.52 | 2.12E-05 | 7.98E-04 |
| MMP15      | 352.93   | 1.76 | 0.66 | 2.08E-04 | 4.38E-03 |
| SH3BP1     | 241.10   | 1.76 | 0.66 | 2.20E-04 | 4.51E-03 |
| RNF175     | 236.95   | 1.74 | 0.95 | 1.28E-03 | 1.56E-02 |
| BTBD11     | 235.30   | 1.74 | 0.56 | 6.63E-05 | 1.90E-03 |
| KIF11      | 408.19   | 1.74 | 0.55 | 4.86E-05 | 1.49E-03 |
| KCNK1      | 157.55   | 1.72 | 0.99 | 1.50E-03 | 1.75E-02 |
| SLC16A3    | 534.54   | 1.71 | 0.37 | 1.92E-07 | 2.27E-05 |
| ACSM3      | 173.60   | 1.71 | 0.35 | 3.94E-08 | 5.93E-06 |
| SEZ6       | 38.07    | 1.71 | 0.47 | 1.28E-05 | 5.47E-04 |
| DEPDC1     | 215.16   | 1.69 | 1.27 | 2.38E-03 | 2.42E-02 |
| GPR137C    | 175.23   | 1.69 | 0.56 | 8.95E-05 | 2.30E-03 |
| PARPB      | 482.31   | 1.68 | 0.36 | 1.15E-07 | 1.45E-05 |
| ARMC9      | 2667.59  | 1.68 | 0.56 | 9.41E-05 | 2.39E-03 |
| MXRA5      | 35898.30 | 1.67 | 0.77 | 5.89E-04 | 9.03E-03 |
| MMP16      | 4071.84  | 1.66 | 1.00 | 1.69E-03 | 1.89E-02 |
| SYNDIG1    | 652.42   | 1.66 | 0.78 | 8.10E-04 | 1.13E-02 |
| SLC1A1     | 734.10   | 1.66 | 0.58 | 1.37E-04 | 3.15E-03 |
| PLEKHG4B   | 70.97    | 1.66 | 1.32 | 2.77E-03 | 2.66E-02 |
| PLK1       | 295.88   | 1.65 | 1.04 | 1.94E-03 | 2.09E-02 |
| ALCAM      | 6972.62  | 1.64 | 0.65 | 3.47E-04 | 6.31E-03 |
| C9orf84    | 22.17    | 1.64 | 0.59 | 2.52E-04 | 5.02E-03 |
| TMT2C      | 367.50   | 1.62 | 1.06 | 2.11E-03 | 2.21E-02 |
| RAB40A     | 86.33    | 1.62 | 0.97 | 1.88E-03 | 2.05E-02 |
| SMC1B      | 6.75     | 1.62 | 1.24 | 5.68E-03 | 4.36E-02 |
| PRPH2      | 676.87   | 1.62 | 0.67 | 4.57E-04 | 7.61E-03 |
| TMEM154    | 589.27   | 1.61 | 0.53 | 8.28E-05 | 2.19E-03 |
| FNDC10     | 1304.43  | 1.61 | 0.76 | 8.63E-04 | 1.18E-02 |
| GPR162     | 233.15   | 1.60 | 0.60 | 2.50E-04 | 4.99E-03 |
| SMC4       | 3917.28  | 1.59 | 0.29 | 1.17E-09 | 2.93E-07 |
| GRK3       | 1319.29  | 1.58 | 0.93 | 1.75E-03 | 1.95E-02 |
| PLPPR4     | 2029.95  | 1.57 | 0.74 | 8.99E-04 | 1.22E-02 |
| ABCC4      | 977.90   | 1.56 | 0.74 | 9.21E-04 | 1.24E-02 |
| BMP8A      | 61.74    | 1.55 | 0.80 | 1.42E-03 | 1.67E-02 |
| TLR9       | 20.19    | 1.55 | 1.00 | 2.81E-03 | 2.68E-02 |
| BRCA2      | 486.17   | 1.55 | 0.52 | 1.10E-04 | 2.69E-03 |

|          |          |      |      |          |          |
|----------|----------|------|------|----------|----------|
| DCBLD1   | 1587.78  | 1.55 | 0.29 | 7.95E-09 | 1.56E-06 |
| OTUB2    | 144.94   | 1.54 | 0.54 | 1.57E-04 | 3.52E-03 |
| RADS4L   | 86.89    | 1.52 | 1.59 | 3.57E-03 | 3.17E-02 |
| HTRA4    | 68.17    | 1.51 | 0.53 | 1.71E-04 | 3.75E-03 |
| DIRAS3   | 692.89   | 1.51 | 1.17 | 2.95E-03 | 2.77E-02 |
| FAM171A2 | 726.46   | 1.51 | 0.79 | 1.42E-03 | 1.67E-02 |
| SHCBP1   | 326.72   | 1.51 | 1.29 | 3.23E-03 | 2.95E-02 |
| BCL11A   | 62.86    | 1.50 | 1.22 | 3.38E-03 | 3.04E-02 |
| SULF2    | 22441.74 | 1.50 | 0.62 | 4.83E-04 | 7.90E-03 |
| TMEM200A | 2807.82  | 1.50 | 0.62 | 5.09E-04 | 8.13E-03 |
| CDH11    | 24057.44 | 1.50 | 0.69 | 7.50E-04 | 1.07E-02 |
| CHRNE    | 143.54   | 1.50 | 0.73 | 1.19E-03 | 1.49E-02 |
| TNFRSF6B | 1045.82  | 1.49 | 1.47 | 3.44E-03 | 3.07E-02 |
| ARHGAP28 | 4829.74  | 1.49 | 1.00 | 2.54E-03 | 2.54E-02 |
| HAGHL    | 353.04   | 1.49 | 0.40 | 8.24E-06 | 3.98E-04 |
| VDR      | 1561.58  | 1.49 | 0.66 | 7.50E-04 | 1.07E-02 |
| ZNF608   | 538.82   | 1.48 | 0.79 | 1.56E-03 | 1.79E-02 |
| STK17B   | 5869.09  | 1.47 | 0.79 | 1.53E-03 | 1.77E-02 |
| CASP1    | 1034.93  | 1.46 | 0.58 | 4.11E-04 | 7.06E-03 |
| GXYLT2   | 13456.10 | 1.46 | 0.99 | 2.67E-03 | 2.62E-02 |
| FKBP11   | 4415.41  | 1.46 | 0.38 | 6.53E-06 | 3.32E-04 |
| CFAP206  | 18.53    | 1.46 | 1.51 | 4.65E-03 | 3.82E-02 |
| PANO1    | 37.95    | 1.45 | 0.73 | 1.51E-03 | 1.75E-02 |
| RAD51    | 235.78   | 1.45 | 1.00 | 2.85E-03 | 2.71E-02 |
| XPR1     | 2360.09  | 1.43 | 0.97 | 2.78E-03 | 2.67E-02 |
| OSTC     | 15442.18 | 1.43 | 0.38 | 9.59E-06 | 4.48E-04 |
| SMCO4    | 1435.74  | 1.42 | 0.28 | 2.49E-08 | 4.11E-06 |
| TLCD1    | 203.51   | 1.42 | 1.06 | 3.30E-03 | 3.00E-02 |
| CENPK    | 313.23   | 1.42 | 1.00 | 3.05E-03 | 2.84E-02 |
| CACNA1D  | 180.91   | 1.41 | 0.54 | 3.67E-04 | 6.54E-03 |
| P2RY1    | 909.16   | 1.40 | 0.45 | 7.80E-05 | 2.11E-03 |
| LAYN     | 2181.04  | 1.40 | 0.50 | 2.07E-04 | 4.37E-03 |
| C4orf48  | 897.12   | 1.39 | 0.55 | 4.64E-04 | 7.70E-03 |
| C1orf74  | 253.29   | 1.39 | 0.68 | 1.31E-03 | 1.58E-02 |
| TLR6     | 140.25   | 1.39 | 1.07 | 3.58E-03 | 3.17E-02 |
| ACTR3C   | 144.30   | 1.39 | 0.56 | 5.02E-04 | 8.08E-03 |
| ZNF730   | 58.66    | 1.39 | 0.63 | 1.05E-03 | 1.37E-02 |
| TANC2    | 2097.31  | 1.38 | 0.24 | 3.07E-10 | 9.05E-08 |
| ADAMTS12 | 1897.36  | 1.38 | 0.59 | 6.73E-04 | 9.96E-03 |
| MAGEL2   | 466.23   | 1.38 | 1.02 | 3.40E-03 | 3.05E-02 |
| COL8A1   | 17566.18 | 1.38 | 0.60 | 7.14E-04 | 1.04E-02 |
| ABHD17C  | 469.67   | 1.38 | 0.48 | 1.88E-04 | 4.07E-03 |
| ZNF93    | 495.20   | 1.38 | 0.36 | 6.23E-06 | 3.20E-04 |
| DIAPH3   | 288.05   | 1.38 | 1.35 | 4.09E-03 | 3.50E-02 |
| GBP3     | 2484.56  | 1.37 | 0.33 | 2.09E-06 | 1.41E-04 |
| GRAMD1B  | 201.30   | 1.37 | 1.14 | 3.88E-03 | 3.36E-02 |
| GRIK2    | 155.41   | 1.37 | 0.77 | 2.19E-03 | 2.27E-02 |
| HENMT1   | 768.90   | 1.37 | 0.31 | 5.41E-07 | 4.79E-05 |
| SERPINH1 | 55253.57 | 1.37 | 0.49 | 2.17E-04 | 4.45E-03 |
| SRGAP3   | 970.55   | 1.37 | 0.48 | 2.08E-04 | 4.38E-03 |
| ENPP2    | 9052.02  | 1.36 | 1.35 | 4.09E-03 | 3.49E-02 |
| CENPE    | 275.17   | 1.35 | 0.78 | 2.34E-03 | 2.39E-02 |
| BANK1    | 125.87   | 1.34 | 1.19 | 4.22E-03 | 3.56E-02 |
| ARHGAP22 | 1300.81  | 1.34 | 0.91 | 3.17E-03 | 2.91E-02 |
| TUSC3    | 3762.48  | 1.34 | 0.55 | 5.91E-04 | 9.05E-03 |
| ZKSCAN4  | 485.01   | 1.33 | 0.43 | 1.02E-04 | 2.55E-03 |
| EPHB2    | 3742.10  | 1.33 | 0.56 | 6.54E-04 | 9.72E-03 |
| SERPINE2 | 13321.12 | 1.32 | 0.92 | 3.31E-03 | 3.00E-02 |
| PTGER3   | 3173.17  | 1.32 | 0.83 | 2.77E-03 | 2.67E-02 |
| TIGD2    | 358.78   | 1.32 | 0.38 | 3.20E-05 | 1.11E-03 |
| FZD2     | 504.43   | 1.31 | 0.64 | 1.43E-03 | 1.68E-02 |
| ORAI2    | 3937.47  | 1.31 | 0.39 | 3.81E-05 | 1.24E-03 |
| BICDL2   | 49.30    | 1.30 | 0.53 | 6.78E-04 | 1.00E-02 |
| ADGRL1   | 870.62   | 1.30 | 0.52 | 5.38E-04 | 8.47E-03 |
| FKBP10   | 3333.20  | 1.28 | 0.83 | 3.19E-03 | 2.92E-02 |
| COBL     | 67.70    | 1.27 | 0.59 | 1.27E-03 | 1.56E-02 |
| RIPK3    | 601.82   | 1.27 | 0.71 | 2.40E-03 | 2.44E-02 |
| STIL     | 203.91   | 1.27 | 0.70 | 2.34E-03 | 2.39E-02 |
| ZNF697   | 359.65   | 1.27 | 0.21 | 5.11E-11 | 1.97E-08 |
| P3H4     | 7350.05  | 1.26 | 0.66 | 1.89E-03 | 2.05E-02 |
| C4orf47  | 154.93   | 1.26 | 1.08 | 4.69E-03 | 3.85E-02 |
| POMC     | 202.41   | 1.26 | 0.80 | 3.33E-03 | 3.02E-02 |
| FASTKD1  | 1073.13  | 1.25 | 0.41 | 1.04E-04 | 2.58E-03 |
| CCDC184  | 175.83   | 1.25 | 0.94 | 4.25E-03 | 3.58E-02 |
| CTHRC1   | 42439.03 | 1.25 | 1.07 | 4.55E-03 | 3.77E-02 |
| MAD2L1   | 573.57   | 1.25 | 0.62 | 1.62E-03 | 1.84E-02 |
| LAMB4    | 38.49    | 1.25 | 0.63 | 2.07E-03 | 2.19E-02 |
| MAPK12   | 1386.45  | 1.25 | 1.07 | 4.64E-03 | 3.82E-02 |
| LRRC61   | 777.38   | 1.25 | 0.66 | 2.08E-03 | 2.20E-02 |
| SULF1    | 25454.90 | 1.25 | 0.63 | 1.74E-03 | 1.94E-02 |
| OXSM     | 626.76   | 1.24 | 0.43 | 2.09E-04 | 4.38E-03 |
| CARD14   | 61.26    | 1.24 | 0.55 | 1.11E-03 | 1.42E-02 |
| C1orf53  | 81.09    | 1.24 | 0.72 | 2.93E-03 | 2.77E-02 |
| ZFP69B   | 156.75   | 1.23 | 0.71 | 2.81E-03 | 2.68E-02 |
| FANCF    | 735.78   | 1.23 | 0.19 | 1.21E-11 | 6.39E-09 |
| RTP4     | 288.57   | 1.22 | 0.60 | 1.69E-03 | 1.89E-02 |
| RIMBP2   | 692.06   | 1.22 | 1.22 | 5.28E-03 | 4.18E-02 |
| IGF1     | 23223.49 | 1.21 | 0.97 | 4.66E-03 | 3.83E-02 |
| RHOBTB1  | 2538.76  | 1.20 | 0.30 | 5.17E-06 | 2.79E-04 |
| MAGED1   | 31746.77 | 1.20 | 0.58 | 1.55E-03 | 1.78E-02 |
| CKAP2    | 1779.46  | 1.20 | 0.46 | 4.98E-04 | 8.06E-03 |
| FXYD5    | 4527.18  | 1.20 | 0.68 | 2.71E-03 | 2.63E-02 |
| PLOD1    | 18377.83 | 1.20 | 0.26 | 2.34E-07 | 2.74E-05 |
| GREM1    | 3604.42  | 1.19 | 1.21 | 5.73E-03 | 4.38E-02 |
| ANKRD2   | 109.77   | 1.19 | 0.57 | 1.68E-03 | 1.88E-02 |
| P3H1     | 16501.19 | 1.19 | 0.59 | 1.80E-03 | 1.98E-02 |
| LMO7     | 1253.40  | 1.18 | 0.45 | 4.19E-04 | 7.17E-03 |
| SOX12    | 1054.18  | 1.18 | 0.43 | 3.44E-04 | 6.28E-03 |
| FBXO4    | 1186.17  | 1.18 | 0.24 | 6.03E-08 | 8.49E-06 |
| CPPED1   | 3277.26  | 1.18 | 0.50 | 9.08E-04 | 1.22E-02 |
| UBE2T    | 344.48   | 1.18 | 1.07 | 5.47E-03 | 4.26E-02 |
| RCC1     | 763.99   | 1.17 | 0.42 | 2.86E-04 | 5.46E-03 |

|          |          |      |      |          |          |
|----------|----------|------|------|----------|----------|
| GRM6     | 28.28    | 1.17 | 0.64 | 3.06E-03 | 2.84E-02 |
| DNAJC15  | 4046.76  | 1.17 | 0.37 | 9.16E-05 | 2.34E-03 |
| MIS18BP1 | 3246.00  | 1.16 | 0.59 | 2.13E-03 | 2.23E-02 |
| VANGL2   | 455.43   | 1.15 | 0.63 | 2.67E-03 | 2.62E-02 |
| EPHB3    | 4209.14  | 1.15 | 1.00 | 5.45E-03 | 4.25E-02 |
| N4BP2    | 1891.00  | 1.15 | 0.37 | 1.10E-04 | 2.69E-03 |
| HSD11B2  | 1637.41  | 1.15 | 1.57 | 5.92E-03 | 4.49E-02 |
| IDH2     | 8016.33  | 1.15 | 0.52 | 1.22E-03 | 1.51E-02 |
| PLPP2    | 166.48   | 1.15 | 1.12 | 6.02E-03 | 4.55E-02 |
| SCD      | 835.04   | 1.15 | 0.43 | 4.69E-04 | 7.73E-03 |
| CAPG     | 7423.12  | 1.15 | 0.43 | 4.38E-04 | 7.36E-03 |
| TRIM16   | 1617.51  | 1.14 | 0.47 | 8.27E-04 | 1.14E-02 |
| CCDC28B  | 1403.80  | 1.14 | 0.35 | 6.83E-05 | 1.94E-03 |
| HSBP1L1  | 672.94   | 1.14 | 0.56 | 2.00E-03 | 2.14E-02 |
| IL1RAP   | 1759.76  | 1.14 | 0.52 | 1.45E-03 | 1.70E-02 |
| SGO2     | 717.70   | 1.14 | 0.74 | 4.16E-03 | 3.52E-02 |
| AIPL1    | 18.82    | 1.13 | 0.81 | 6.14E-03 | 4.61E-02 |
| RAP2B    | 3741.18  | 1.13 | 0.40 | 2.85E-04 | 5.46E-03 |
| FERMT1   | 214.16   | 1.13 | 0.95 | 5.86E-03 | 4.46E-02 |
| SPATA17  | 78.80    | 1.13 | 0.76 | 4.78E-03 | 3.90E-02 |
| B4GALNT4 | 77.25    | 1.13 | 1.53 | 6.32E-03 | 4.71E-02 |
| RBM43    | 728.47   | 1.13 | 0.42 | 4.35E-04 | 7.35E-03 |
| MCEE     | 2187.16  | 1.12 | 0.13 | 3.19E-18 | 9.80E-15 |
| ZNF888   | 246.58   | 1.12 | 0.38 | 2.31E-04 | 4.68E-03 |
| KCTD15   | 850.69   | 1.12 | 0.37 | 1.47E-04 | 3.34E-03 |
| CASC10   | 412.98   | 1.12 | 0.79 | 4.89E-03 | 3.96E-02 |
| PTK7     | 9053.38  | 1.12 | 0.98 | 5.90E-03 | 4.49E-02 |
| RM1      | 623.54   | 1.12 | 0.33 | 5.35E-05 | 1.61E-03 |
| NHLRC1   | 264.05   | 1.12 | 0.42 | 4.93E-04 | 7.99E-03 |
| ANLN     | 775.28   | 1.12 | 1.62 | 6.20E-03 | 4.64E-02 |
| DAPK1    | 3413.51  | 1.11 | 0.67 | 3.70E-03 | 3.26E-02 |
| CENPF    | 588.09   | 1.11 | 0.87 | 5.54E-03 | 4.29E-02 |
| FBM2     | 236.17   | 1.11 | 1.37 | 6.42E-03 | 4.75E-02 |
| MFAP2    | 20659.07 | 1.11 | 0.64 | 3.41E-03 | 3.06E-02 |
| MORN3    | 85.85    | 1.11 | 0.50 | 1.51E-03 | 1.75E-02 |
| CHST2    | 1418.60  | 1.10 | 0.91 | 5.93E-03 | 4.50E-02 |
| CTSB     | 78372.91 | 1.10 | 0.30 | 1.49E-05 | 6.09E-04 |
| SNX8     | 1099.60  | 1.10 | 0.47 | 1.03E-03 | 1.34E-02 |
| PRUNE2   | 2488.18  | 1.10 | 0.66 | 3.80E-03 | 3.32E-02 |
| CRMP1    | 1201.08  | 1.10 | 1.04 | 6.34E-03 | 4.71E-02 |
| FKBP14   | 7910.41  | 1.10 | 0.80 | 5.31E-03 | 4.19E-02 |
| RTN4RL2  | 1177.41  | 1.10 | 0.41 | 4.64E-04 | 7.70E-03 |
| SCD5     | 1737.91  | 1.10 | 0.46 | 9.48E-04 | 1.27E-02 |
| SLC2A9   | 293.22   | 1.09 | 0.72 | 4.80E-03 | 3.91E-02 |
| PHTF2    | 4137.25  | 1.09 | 0.31 | 3.48E-05 | 1.16E-03 |
| TRPM8    | 11.98    | 1.08 | 1.09 | 8.99E-03 | 5.95E-02 |
| SAMD9    | 1791.89  | 1.08 | 0.28 | 9.82E-06 | 4.54E-04 |
| AP1S1    | 546.97   | 1.08 | 0.68 | 4.29E-03 | 3.60E-02 |
| MAGED4B  | 2310.29  | 1.08 | 0.36 | 1.81E-04 | 3.95E-03 |
| TICAM2   | 2174.20  | 1.08 | 0.45 | 1.01E-03 | 1.33E-02 |
| TPMT     | 2008.27  | 1.08 | 0.29 | 1.78E-05 | 6.98E-04 |
| ZNF85    | 497.90   | 1.08 | 0.28 | 1.15E-05 | 5.00E-04 |
| SLC9A5   | 405.86   | 1.08 | 0.63 | 3.83E-03 | 3.33E-02 |
| VWA7     | 42.18    | 1.07 | 0.95 | 7.27E-03 | 5.18E-02 |
| ZKSCAN7  | 596.59   | 1.07 | 0.37 | 2.91E-04 | 5.56E-03 |
| PAFAH1B3 | 571.28   | 1.06 | 0.52 | 2.19E-03 | 2.27E-02 |
| SLC29A4  | 589.77   | 1.06 | 0.73 | 5.38E-03 | 4.22E-02 |
| SPDL1    | 790.45   | 1.06 | 0.23 | 3.23E-07 | 3.44E-05 |
| RAB31    | 14448.41 | 1.05 | 0.30 | 3.61E-05 | 1.19E-03 |
| LSAMP    | 2350.33  | 1.05 | 0.71 | 5.34E-03 | 4.20E-02 |
| LHFPL2   | 11315.79 | 1.05 | 0.62 | 3.99E-03 | 3.44E-02 |
| SPAG4    | 199.94   | 1.05 | 1.07 | 7.28E-03 | 5.18E-02 |
| SSC4D    | 80.87    | 1.05 | 0.43 | 1.01E-03 | 1.33E-02 |
| DNAJB7   | 9.22     | 1.05 | 1.23 | 1.04E-02 | 6.53E-02 |
| KCNE3    | 506.89   | 1.04 | 0.41 | 6.99E-04 | 1.02E-02 |
| SLC7A7   | 1077.86  | 1.04 | 2.01 | 6.29E-03 | 4.69E-02 |
| CCDC96   | 135.65   | 1.04 | 0.42 | 9.65E-04 | 1.28E-02 |
| PABPC4L  | 447.59   | 1.04 | 0.44 | 1.15E-03 | 1.44E-02 |
| SLC38A6  | 2175.97  | 1.04 | 0.32 | 8.41E-05 | 2.22E-03 |
| NAT14    | 746.43   | 1.04 | 0.32 | 8.45E-05 | 2.22E-03 |
| EFNA4    | 526.30   | 1.03 | 0.45 | 1.39E-03 | 1.65E-02 |
| HELLS    | 439.34   | 1.03 | 0.50 | 2.30E-03 | 2.36E-02 |
| LRRRC19  | 19.95    | 1.03 | 0.81 | 8.01E-03 | 5.53E-02 |
| PPIB     | 52039.63 | 1.03 | 0.33 | 1.25E-04 | 2.91E-03 |
| SLC16A1  | 10493.86 | 1.03 | 0.77 | 6.29E-03 | 4.69E-02 |
| DHFR     | 515.76   | 1.03 | 0.76 | 6.29E-03 | 4.69E-02 |
| AKR7L    | 28.92    | 1.02 | 0.49 | 2.59E-03 | 2.57E-02 |
| RAD51AP1 | 231.62   | 1.02 | 1.03 | 7.77E-03 | 5.42E-02 |
| SLFN12   | 828.45   | 1.01 | 0.55 | 3.32E-03 | 3.01E-02 |
| AGRN     | 1301.23  | 1.01 | 0.35 | 2.80E-04 | 5.39E-03 |
| ZNF587B  | 304.65   | 1.01 | 0.34 | 2.15E-04 | 4.45E-03 |
| AKAP5    | 56.05    | 1.01 | 0.37 | 5.08E-04 | 8.12E-03 |
| ZMYND12  | 122.20   | 1.01 | 0.79 | 7.17E-03 | 5.13E-02 |
| FSBP     | 152.78   | 1.01 | 0.51 | 2.88E-03 | 2.72E-02 |
| GPX7     | 3941.30  | 1.01 | 0.71 | 6.03E-03 | 4.55E-02 |
| OSBPL7   | 902.54   | 1.01 | 0.40 | 7.48E-04 | 1.07E-02 |
| GLIPR1   | 7304.40  | 1.01 | 0.46 | 1.62E-03 | 1.84E-02 |
| GINS4    | 112.56   | 1.01 | 0.50 | 2.57E-03 | 2.55E-02 |
| PDI5     | 5512.79  | 1.01 | 0.59 | 4.23E-03 | 3.57E-02 |
| NMI      | 2207.90  | 1.01 | 0.28 | 2.70E-05 | 9.65E-04 |
| TP53INP1 | 5488.53  | 1.01 | 0.45 | 1.62E-03 | 1.84E-02 |
| SLC7A11  | 46.67    | 1.01 | 0.98 | 8.43E-03 | 5.70E-02 |
| BRIP1    | 110.70   | 1.00 | 0.65 | 5.73E-03 | 4.38E-02 |
| SLC39A7  | 4931.36  | 1.00 | 0.76 | 6.96E-03 | 5.02E-02 |
| FAAP24   | 253.94   | 1.00 | 0.34 | 2.98E-04 | 5.64E-03 |
| KDEL1C1  | 2664.37  | 1.00 | 0.42 | 1.29E-03 | 1.57E-02 |
| TRIM6    | 834.28   | 0.99 | 0.78 | 7.24E-03 | 5.17E-02 |
| TMEM132E | 157.13   | 0.99 | 0.55 | 4.12E-03 | 3.51E-02 |
| HMG1     | 12524.41 | 0.99 | 0.15 | 2.18E-12 | 1.45E-09 |
| PGM2L1   | 1537.28  | 0.99 | 0.34 | 2.84E-04 | 5.45E-03 |
| RGS14    | 652.64   | 0.99 | 0.81 | 7.61E-03 | 5.36E-02 |
| CCT6B    | 204.28   | 0.99 | 0.35 | 3.75E-04 | 6.65E-03 |

|           |           |      |      |          |          |
|-----------|-----------|------|------|----------|----------|
| ARHGEF19  | 924.97    | 0.99 | 0.58 | 4.59E-03 | 3.79E-02 |
| HS25T1    | 2811.32   | 0.98 | 0.36 | 5.06E-04 | 8.10E-03 |
| TGFB1     | 3572.94   | 0.98 | 0.42 | 1.42E-03 | 1.67E-02 |
| C17orf107 | 516.26    | 0.98 | 0.53 | 3.76E-03 | 3.30E-02 |
| IFT20     | 3167.41   | 0.98 | 0.24 | 4.70E-06 | 2.59E-04 |
| IL15      | 426.23    | 0.98 | 1.04 | 8.43E-03 | 5.70E-02 |
| MMP14     | 4532.85   | 0.98 | 0.74 | 7.28E-03 | 5.18E-02 |
| TTC30B    | 468.44    | 0.98 | 0.37 | 6.74E-04 | 9.96E-03 |
| XKR8      | 1087.71   | 0.97 | 0.27 | 3.05E-05 | 1.06E-03 |
| SPATS2    | 2129.45   | 0.97 | 0.19 | 3.11E-08 | 4.96E-06 |
| TBC1D8B   | 3527.27   | 0.97 | 0.41 | 1.38E-03 | 1.65E-02 |
| TMEM177   | 433.05    | 0.97 | 0.34 | 4.20E-04 | 7.18E-03 |
| CASP8     | 1365.81   | 0.97 | 0.41 | 1.38E-03 | 1.65E-02 |
| BCAS1     | 54.13     | 0.97 | 0.62 | 6.20E-03 | 4.64E-02 |
| ZNF860    | 75.73     | 0.96 | 0.58 | 5.46E-03 | 4.25E-02 |
| ICAM3     | 767.47    | 0.96 | 0.36 | 6.27E-04 | 9.37E-03 |
| GOLM1     | 12882.41  | 0.96 | 0.60 | 5.53E-03 | 4.29E-02 |
| UAP1L1    | 3410.52   | 0.96 | 0.29 | 8.58E-05 | 2.23E-03 |
| STK32C    | 956.11    | 0.95 | 0.39 | 1.18E-03 | 1.48E-02 |
| CYP2R1    | 748.16    | 0.95 | 0.24 | 8.26E-06 | 3.98E-04 |
| ZDHH20    | 4603.30   | 0.95 | 0.57 | 5.44E-03 | 4.25E-02 |
| CMTM4     | 2084.40   | 0.95 | 0.63 | 6.65E-03 | 4.86E-02 |
| CASR      | 43.24     | 0.94 | 0.86 | 9.58E-03 | 6.19E-02 |
| SAMD13    | 129.80    | 0.94 | 0.45 | 2.77E-03 | 2.67E-02 |
| WNK3      | 148.98    | 0.94 | 0.59 | 6.10E-03 | 4.59E-02 |
| OR2L2     | 63.38     | 0.94 | 0.51 | 4.25E-03 | 3.58E-02 |
| TGFB3     | 11255.01  | 0.94 | 0.46 | 2.95E-03 | 2.78E-02 |
| IL11      | 50.87     | 0.94 | 0.68 | 8.22E-03 | 5.63E-02 |
| OSTF1     | 3531.28   | 0.94 | 0.43 | 2.03E-03 | 2.16E-02 |
| B4GALT6   | 220.71    | 0.94 | 0.45 | 2.75E-03 | 2.66E-02 |
| ACTR2     | 16092.55  | 0.94 | 0.46 | 2.63E-03 | 2.59E-02 |
| CERCAM    | 42367.41  | 0.94 | 0.84 | 8.57E-03 | 5.77E-02 |
| SYT7      | 247.37    | 0.94 | 0.79 | 8.93E-03 | 5.92E-02 |
| CGNL1     | 806.51    | 0.94 | 0.47 | 3.21E-03 | 2.93E-02 |
| THY1      | 71863.18  | 0.93 | 0.79 | 8.77E-03 | 5.85E-02 |
| NUDT14    | 616.38    | 0.93 | 0.77 | 8.79E-03 | 5.86E-02 |
| RASD2     | 334.00    | 0.93 | 0.58 | 6.03E-03 | 4.55E-02 |
| SYT5      | 28.84     | 0.93 | 0.57 | 6.71E-03 | 4.89E-02 |
| RCN1      | 26724.66  | 0.93 | 0.52 | 4.50E-03 | 3.74E-02 |
| MDK       | 13087.63  | 0.93 | 0.74 | 8.65E-03 | 5.81E-02 |
| PYCARD    | 1446.12   | 0.93 | 0.65 | 7.63E-03 | 5.36E-02 |
| MLKL      | 1180.91   | 0.93 | 0.68 | 8.02E-03 | 5.53E-02 |
| PHTF1     | 2397.94   | 0.93 | 0.42 | 2.21E-03 | 2.29E-02 |
| ZNF20     | 74.59     | 0.92 | 0.67 | 8.31E-03 | 5.64E-02 |
| CYBSR2    | 1171.41   | 0.92 | 0.73 | 8.73E-03 | 5.83E-02 |
| RAB7B     | 4482.33   | 0.92 | 0.62 | 7.16E-03 | 5.12E-02 |
| ORMDL3    | 3287.00   | 0.92 | 0.49 | 4.04E-03 | 3.47E-02 |
| RYR1      | 241.40    | 0.92 | 0.57 | 6.34E-03 | 4.71E-02 |
| PRPF19    | 569.31    | 0.91 | 0.29 | 1.53E-04 | 3.45E-03 |
| SLC16A14  | 296.50    | 0.91 | 0.35 | 7.60E-04 | 1.07E-02 |
| SLX4IP    | 601.86    | 0.91 | 0.26 | 5.40E-05 | 1.61E-03 |
| TBC1D3B   | 48.11     | 0.91 | 0.69 | 9.20E-03 | 6.04E-02 |
| FMBP1L    | 3696.37   | 0.91 | 0.22 | 4.02E-06 | 2.34E-04 |
| RACGAP1   | 1078.69   | 0.91 | 0.70 | 8.88E-03 | 5.91E-02 |
| PAQR6     | 36.52     | 0.91 | 0.62 | 8.27E-03 | 5.64E-02 |
| TRPS1     | 3063.60   | 0.90 | 0.44 | 3.14E-03 | 2.89E-02 |
| GALM      | 2427.89   | 0.90 | 0.24 | 1.57E-05 | 6.33E-04 |
| CDH24     | 389.31    | 0.90 | 0.77 | 9.97E-03 | 6.36E-02 |
| BET1      | 3828.28   | 0.90 | 0.24 | 1.84E-05 | 7.14E-04 |
| ZNF555    | 621.61    | 0.89 | 0.42 | 2.80E-03 | 2.68E-02 |
| CLN6      | 400.58    | 0.89 | 0.35 | 9.84E-04 | 1.30E-02 |
| GPX8      | 13109.72  | 0.89 | 0.74 | 9.48E-03 | 6.15E-02 |
| TNIK      | 683.67    | 0.89 | 0.49 | 4.96E-03 | 3.98E-02 |
| TMED3     | 8119.15   | 0.89 | 0.36 | 1.13E-03 | 1.43E-02 |
| CDC42EP5  | 2947.33   | 0.89 | 0.24 | 2.77E-05 | 9.83E-04 |
| SLC35B3   | 3300.35   | 0.89 | 0.37 | 1.46E-03 | 1.70E-02 |
| BORA      | 432.00    | 0.89 | 0.44 | 3.44E-03 | 3.07E-02 |
| ZNF675    | 776.39    | 0.88 | 0.28 | 1.75E-04 | 3.84E-03 |
| CYBA      | 12977.62  | 0.88 | 0.77 | 1.03E-02 | 6.48E-02 |
| SRDS3     | 2319.52   | 0.88 | 0.30 | 3.20E-04 | 5.93E-03 |
| SOC55     | 6208.10   | 0.88 | 0.48 | 4.90E-03 | 3.96E-02 |
| DISC1     | 459.76    | 0.88 | 1.04 | 1.07E-02 | 6.62E-02 |
| DIP5      | 97.37     | 0.88 | 0.62 | 9.13E-03 | 6.00E-02 |
| NUDT19    | 527.90    | 0.88 | 0.50 | 5.66E-03 | 4.35E-02 |
| CCDC170   | 235.05    | 0.88 | 0.74 | 1.05E-02 | 6.56E-02 |
| DNASE1L1  | 1233.35   | 0.87 | 0.42 | 3.03E-03 | 2.83E-02 |
| ZNF792    | 275.55    | 0.87 | 0.60 | 8.60E-03 | 5.79E-02 |
| FAM214B   | 2306.27   | 0.87 | 0.26 | 7.96E-05 | 2.14E-03 |
| ZNF155    | 459.61    | 0.87 | 0.24 | 3.30E-05 | 1.12E-03 |
| RPGRIP1L  | 1226.39   | 0.87 | 0.55 | 7.30E-03 | 5.19E-02 |
| ARID3A    | 373.55    | 0.87 | 0.38 | 2.15E-03 | 2.24E-02 |
| SLC25A15  | 396.41    | 0.87 | 0.33 | 8.23E-04 | 1.14E-02 |
| PAPSS1    | 7829.06   | 0.87 | 0.24 | 2.95E-05 | 1.03E-03 |
| CREB3L1   | 12122.77  | 0.87 | 0.97 | 1.10E-02 | 6.76E-02 |
| CYB561D2  | 1690.68   | 0.86 | 0.23 | 1.97E-05 | 7.56E-04 |
| RASSF2    | 4468.19   | 0.86 | 0.69 | 1.02E-02 | 6.45E-02 |
| DNAJC28   | 158.04    | 0.86 | 0.48 | 5.44E-03 | 4.25E-02 |
| FTL       | 327933.32 | 0.86 | 0.32 | 1.01E-03 | 1.33E-02 |
| GEN1      | 485.05    | 0.86 | 0.48 | 5.38E-03 | 4.22E-02 |
| TMEM60    | 1935.66   | 0.86 | 0.25 | 7.85E-05 | 2.12E-03 |
| PIF1      | 254.03    | 0.86 | 0.52 | 6.86E-03 | 4.98E-02 |
| RCN3      | 31857.08  | 0.86 | 0.86 | 1.13E-02 | 6.89E-02 |
| SRPRB     | 5192.61   | 0.86 | 0.46 | 5.01E-03 | 4.01E-02 |
| CERS6     | 3726.14   | 0.86 | 0.32 | 7.11E-04 | 1.03E-02 |
| STIM2     | 2520.74   | 0.86 | 0.34 | 1.13E-03 | 1.43E-02 |
| PPP2R3A   | 2585.62   | 0.86 | 0.21 | 6.56E-06 | 3.32E-04 |
| RAB42     | 713.11    | 0.86 | 0.85 | 1.16E-02 | 6.98E-02 |
| PGM3      | 7045.22   | 0.86 | 0.36 | 1.73E-03 | 1.93E-02 |
| DCBLD2    | 11307.81  | 0.85 | 0.76 | 1.10E-02 | 6.74E-02 |
| FANCI     | 587.39    | 0.85 | 0.61 | 9.34E-03 | 6.09E-02 |
| EVL       | 1559.47   | 0.85 | 0.26 | 1.23E-04 | 2.88E-03 |
| PPP1R36   | 59.94     | 0.85 | 0.96 | 1.22E-02 | 7.22E-02 |

|           |          |      |      |          |          |
|-----------|----------|------|------|----------|----------|
| MAP10     | 249.81   | 0.85 | 0.28 | 2.60E-04 | 5.12E-03 |
| SSR1      | 21450.18 | 0.84 | 0.31 | 6.51E-04 | 9.68E-03 |
| ZNF530    | 209.28   | 0.84 | 0.20 | 5.04E-06 | 2.75E-04 |
| MGAT3     | 121.34   | 0.84 | 1.30 | 1.05E-02 | 6.56E-02 |
| DSN1      | 1449.73  | 0.84 | 0.21 | 6.76E-06 | 3.40E-04 |
| C9orf116  | 190.94   | 0.84 | 0.28 | 3.27E-04 | 6.02E-03 |
| ZNF737    | 650.17   | 0.84 | 0.43 | 4.36E-03 | 3.66E-02 |
| CCNB1     | 742.20   | 0.84 | 0.69 | 1.14E-02 | 6.92E-02 |
| ARV1      | 1363.46  | 0.84 | 0.19 | 2.13E-06 | 1.43E-04 |
| GORAB     | 1676.20  | 0.84 | 0.18 | 2.78E-07 | 3.18E-05 |
| IL18R1    | 438.48   | 0.84 | 1.10 | 1.14E-02 | 6.92E-02 |
| IKBIP     | 4799.05  | 0.84 | 0.58 | 9.46E-03 | 6.15E-02 |
| GTF2E1    | 1128.34  | 0.83 | 0.31 | 7.99E-04 | 1.11E-02 |
| PEX11G    | 417.10   | 0.83 | 0.27 | 2.78E-04 | 5.38E-03 |
| ZNF43     | 1519.53  | 0.83 | 0.34 | 1.41E-03 | 1.66E-02 |
| TCEAL8    | 7286.76  | 0.83 | 0.27 | 2.63E-04 | 5.17E-03 |
| SPATS2L   | 13263.84 | 0.83 | 0.33 | 1.26E-03 | 1.54E-02 |
| BMP1      | 15662.46 | 0.83 | 0.66 | 1.10E-02 | 6.76E-02 |
| SLC39A10  | 3970.83  | 0.83 | 0.34 | 1.61E-03 | 1.83E-02 |
| SUV39H2   | 466.03   | 0.83 | 0.35 | 1.95E-03 | 2.10E-02 |
| RIDA      | 1017.48  | 0.83 | 0.18 | 3.96E-07 | 3.94E-05 |
| PTRHD1    | 1107.85  | 0.83 | 0.31 | 9.11E-04 | 1.22E-02 |
| SHB       | 1246.78  | 0.83 | 0.47 | 6.35E-03 | 4.71E-02 |
| SESN3     | 2834.75  | 0.83 | 0.28 | 3.93E-04 | 6.86E-03 |
| WDR5B     | 720.34   | 0.83 | 0.44 | 5.27E-03 | 4.17E-02 |
| KIF15     | 229.89   | 0.82 | 0.85 | 1.29E-02 | 7.50E-02 |
| ATM       | 2807.99  | 0.82 | 0.18 | 7.46E-07 | 6.39E-05 |
| PRR11     | 188.92   | 0.82 | 0.63 | 1.17E-02 | 7.02E-02 |
| BBS12     | 500.90   | 0.82 | 0.54 | 9.35E-03 | 6.10E-02 |
| H2AFY2    | 1318.09  | 0.82 | 0.25 | 1.22E-04 | 2.87E-03 |
| AGA       | 1694.62  | 0.82 | 0.30 | 7.45E-04 | 1.07E-02 |
| C3orf14   | 1022.64  | 0.82 | 0.32 | 1.22E-03 | 1.51E-02 |
| RIN1      | 1011.17  | 0.82 | 0.21 | 1.36E-05 | 5.74E-04 |
| MFSO3     | 690.71   | 0.81 | 0.26 | 2.70E-04 | 5.27E-03 |
| TCN2      | 4914.17  | 0.81 | 0.44 | 5.49E-03 | 4.27E-02 |
| LPAR2     | 225.43   | 0.81 | 0.65 | 1.22E-02 | 7.22E-02 |
| LZTS1     | 1114.87  | 0.81 | 0.64 | 1.20E-02 | 7.16E-02 |
| ARHGAP11A | 252.70   | 0.81 | 0.94 | 1.30E-02 | 7.53E-02 |
| ZNF701    | 805.00   | 0.81 | 0.25 | 1.34E-04 | 3.10E-03 |
| UBE2E1    | 708.29   | 0.81 | 0.49 | 8.22E-03 | 5.63E-02 |
| TST       | 795.71   | 0.81 | 0.57 | 1.07E-02 | 6.62E-02 |
| WDHD1     | 525.37   | 0.81 | 0.24 | 1.28E-04 | 2.96E-03 |
| TBC1D7    | 1422.51  | 0.80 | 0.34 | 2.11E-03 | 2.21E-02 |
| SYCE1L    | 158.64   | 0.80 | 0.79 | 1.37E-02 | 7.87E-02 |
| SEC11A    | 7061.35  | 0.80 | 0.19 | 5.45E-06 | 2.89E-04 |
| SSR3      | 13440.72 | 0.80 | 0.43 | 5.28E-03 | 4.18E-02 |
| PTPA      | 2634.41  | 0.80 | 0.40 | 4.54E-03 | 3.76E-02 |
| PRDX4     | 14637.55 | 0.80 | 0.55 | 1.05E-02 | 6.56E-02 |
| MYL5      | 479.33   | 0.80 | 0.44 | 6.37E-03 | 4.72E-02 |
| ABCC9     | 5531.98  | 0.80 | 0.94 | 1.32E-02 | 7.60E-02 |
| RNASEH2B  | 3915.10  | 0.80 | 0.15 | 7.53E-09 | 1.52E-06 |
| KLHL35    | 271.72   | 0.80 | 0.64 | 1.30E-02 | 7.52E-02 |
| PDKK      | 7036.40  | 0.79 | 0.20 | 1.26E-05 | 5.40E-04 |
| DNAJC13   | 4080.83  | 0.79 | 0.32 | 1.69E-03 | 1.89E-02 |
| PPP1R8    | 1412.76  | 0.79 | 0.46 | 7.31E-03 | 5.19E-02 |
| ACY1      | 1337.11  | 0.79 | 0.24 | 1.47E-04 | 3.34E-03 |
| LRP2BP    | 234.87   | 0.79 | 0.80 | 1.43E-02 | 8.08E-02 |
| GALNT1    | 11013.35 | 0.79 | 0.29 | 8.94E-04 | 1.22E-02 |
| SLC18B1   | 1716.34  | 0.79 | 0.46 | 7.90E-03 | 5.48E-02 |
| ABRACL    | 1569.49  | 0.79 | 1.70 | 8.90E-03 | 5.91E-02 |
| CHSY3     | 1112.87  | 0.79 | 0.46 | 7.77E-03 | 5.42E-02 |
| MRPL17    | 2150.25  | 0.79 | 0.32 | 1.79E-03 | 1.97E-02 |
| YIPF5     | 10062.51 | 0.79 | 0.40 | 4.64E-03 | 3.82E-02 |
| TMEM45A   | 7536.69  | 0.78 | 0.52 | 1.01E-02 | 6.41E-02 |
| AURKA     | 269.32   | 0.78 | 0.68 | 1.41E-02 | 8.00E-02 |
| YIPF2     | 3494.17  | 0.78 | 0.44 | 6.98E-03 | 5.03E-02 |
| SLC50A1   | 2605.55  | 0.78 | 0.26 | 4.25E-04 | 7.22E-03 |
| ZWILCH    | 1208.73  | 0.78 | 0.36 | 3.76E-03 | 3.30E-02 |
| RASL11B   | 881.64   | 0.78 | 1.11 | 1.25E-02 | 7.35E-02 |
| CCNA2     | 428.40   | 0.78 | 1.33 | 1.10E-02 | 6.74E-02 |
| RUNX1     | 5162.93  | 0.78 | 0.83 | 1.45E-02 | 8.15E-02 |
| CHPF2     | 7883.43  | 0.78 | 0.40 | 5.23E-03 | 4.15E-02 |
| ARSB      | 2513.23  | 0.77 | 0.57 | 1.25E-02 | 7.35E-02 |
| SNX25     | 2215.47  | 0.77 | 0.57 | 1.28E-02 | 7.44E-02 |
| GPR107    | 2243.08  | 0.77 | 0.26 | 4.71E-04 | 7.77E-03 |
| AP2S1     | 4041.13  | 0.77 | 0.30 | 1.49E-03 | 1.74E-02 |
| TMEM167B  | 4919.74  | 0.76 | 0.24 | 2.00E-04 | 4.26E-03 |
| IKBKE     | 831.27   | 0.76 | 0.32 | 2.18E-03 | 2.27E-02 |
| CCDC138   | 375.76   | 0.76 | 0.25 | 3.25E-04 | 6.00E-03 |
| LIPT2     | 122.12   | 0.76 | 0.39 | 5.57E-03 | 4.31E-02 |
| USP51     | 167.89   | 0.76 | 0.38 | 5.29E-03 | 4.18E-02 |
| ZNF561    | 1346.63  | 0.76 | 0.20 | 1.60E-05 | 6.43E-04 |
| CRISPDL1  | 5549.98  | 0.76 | 1.19 | 1.14E-02 | 6.92E-02 |
| NBPF1     | 6936.19  | 0.76 | 0.30 | 1.45E-03 | 1.70E-02 |
| BLOC1S3   | 864.65   | 0.76 | 0.36 | 4.47E-03 | 3.72E-02 |
| C1orf122  | 4007.08  | 0.76 | 0.29 | 1.15E-03 | 1.45E-02 |
| ETAA1     | 1877.09  | 0.76 | 0.37 | 4.96E-03 | 3.99E-02 |
| C2orf81   | 704.37   | 0.75 | 0.38 | 5.65E-03 | 4.35E-02 |
| MMP11     | 2429.48  | 0.75 | 0.41 | 6.95E-03 | 5.02E-02 |
| P4HA1     | 12217.39 | 0.75 | 0.45 | 9.22E-03 | 6.04E-02 |
| ZNF572    | 138.97   | 0.75 | 0.39 | 6.33E-03 | 4.71E-02 |
| OR14J1    | 250.43   | 0.75 | 0.25 | 4.64E-04 | 7.70E-03 |
| BEND6     | 1502.01  | 0.75 | 1.07 | 1.36E-02 | 7.80E-02 |
| UBXN6     | 1967.32  | 0.75 | 0.38 | 5.44E-03 | 4.25E-02 |
| SPTSSA    | 6159.21  | 0.75 | 0.25 | 4.52E-04 | 7.56E-03 |
| VHL       | 1847.38  | 0.75 | 0.20 | 2.42E-05 | 8.88E-04 |
| ATF5      | 242.53   | 0.75 | 0.40 | 6.92E-03 | 5.00E-02 |
| PCBP3     | 508.07   | 0.74 | 0.50 | 1.24E-02 | 7.31E-02 |
| PPIL3     | 1458.32  | 0.74 | 0.18 | 5.65E-06 | 2.96E-04 |
| MFSD1     | 9613.92  | 0.74 | 0.26 | 7.11E-04 | 1.03E-02 |
| ZNF613    | 436.26   | 0.74 | 0.27 | 8.26E-04 | 1.14E-02 |
| CISD1     | 2094.62  | 0.74 | 0.17 | 2.55E-06 | 1.64E-04 |

|          |          |      |      |          |          |
|----------|----------|------|------|----------|----------|
| KNSTRN   | 448.61   | 0.74 | 0.52 | 1.32E-02 | 7.60E-02 |
| MPHOSPH9 | 1163.07  | 0.74 | 0.30 | 2.04E-03 | 2.17E-02 |
| SH3BP2   | 1886.88  | 0.74 | 0.62 | 1.60E-02 | 8.72E-02 |
| GMPPA    | 4691.38  | 0.74 | 0.28 | 1.16E-03 | 1.46E-02 |
| SMYD2    | 2192.15  | 0.74 | 0.36 | 4.84E-03 | 3.94E-02 |
| ATF7IP2  | 1065.56  | 0.74 | 1.01 | 1.43E-02 | 8.08E-02 |
| ZNF286A  | 1270.21  | 0.74 | 0.35 | 4.64E-03 | 3.82E-02 |
| CHRN1    | 1070.81  | 0.73 | 0.31 | 2.56E-03 | 2.55E-02 |
| SLX1A    | 2017.54  | 0.73 | 0.52 | 1.36E-02 | 7.79E-02 |
| C21orf58 | 207.68   | 0.73 | 0.31 | 2.67E-03 | 2.62E-02 |
| SRD5A1   | 993.08   | 0.73 | 0.57 | 1.54E-02 | 8.50E-02 |
| EMC10    | 1372.61  | 0.73 | 0.23 | 1.92E-04 | 4.13E-03 |
| PARVB    | 716.22   | 0.73 | 0.45 | 1.06E-02 | 6.59E-02 |
| LBHD1    | 415.38   | 0.73 | 0.38 | 6.46E-03 | 4.77E-02 |
| ATP8B3   | 317.17   | 0.73 | 0.60 | 1.64E-02 | 8.86E-02 |
| BRSK1    | 32.59    | 0.73 | 0.66 | 1.86E-02 | 9.68E-02 |
| CAPZB    | 18471.49 | 0.73 | 0.20 | 5.40E-05 | 1.61E-03 |
| TTC3     | 26416.87 | 0.73 | 0.41 | 8.17E-03 | 5.61E-02 |
| MAGO1B   | 1799.94  | 0.73 | 0.21 | 8.28E-05 | 2.19E-03 |
| HSF2BP   | 71.28    | 0.73 | 0.39 | 8.06E-03 | 5.56E-02 |
| PPP3R1   | 492.84   | 0.73 | 0.42 | 9.09E-03 | 5.99E-02 |
| SLC31A1  | 3068.65  | 0.72 | 0.33 | 4.12E-03 | 3.51E-02 |
| IFIT2    | 2187.49  | 0.72 | 0.47 | 1.21E-02 | 7.20E-02 |
| PD1K1L   | 927.80   | 0.72 | 0.24 | 4.27E-04 | 7.24E-03 |
| FASTKD3  | 802.81   | 0.72 | 0.28 | 1.61E-03 | 1.83E-02 |
| ZNF596   | 369.50   | 0.72 | 0.47 | 1.28E-02 | 7.45E-02 |
| RBM3     | 14283.42 | 0.72 | 0.28 | 1.44E-03 | 1.69E-02 |
| RWDD2B   | 1251.05  | 0.72 | 0.23 | 3.36E-04 | 6.16E-03 |
| MSANTD3  | 2644.63  | 0.72 | 0.37 | 7.11E-03 | 5.10E-02 |
| TP53I3   | 4979.41  | 0.72 | 0.37 | 6.49E-03 | 4.79E-02 |
| CHEK1    | 545.55   | 0.71 | 0.38 | 7.79E-03 | 5.43E-02 |
| ZNF273   | 547.27   | 0.71 | 0.29 | 2.30E-03 | 2.36E-02 |
| BBOF1    | 794.78   | 0.71 | 0.49 | 1.41E-02 | 8.00E-02 |
| SSR2     | 14410.26 | 0.71 | 0.21 | 1.41E-04 | 3.22E-03 |
| CCDC167  | 784.47   | 0.71 | 0.28 | 1.91E-03 | 2.07E-02 |
| WDR41    | 4948.75  | 0.71 | 0.27 | 1.41E-03 | 1.66E-02 |
| SLC19A1  | 1097.21  | 0.71 | 0.39 | 7.93E-03 | 5.49E-02 |
| ZNF253   | 701.81   | 0.71 | 0.43 | 1.10E-02 | 6.76E-02 |
| SNX30    | 1850.48  | 0.71 | 0.37 | 7.20E-03 | 5.15E-02 |
| MC1R     | 630.39   | 0.71 | 0.58 | 1.75E-02 | 9.30E-02 |
| CCDC122  | 541.98   | 0.71 | 0.48 | 1.38E-02 | 7.90E-02 |
| NUDT12   | 1030.15  | 0.70 | 0.26 | 1.07E-03 | 1.38E-02 |
| BIVM     | 2307.53  | 0.70 | 0.41 | 9.68E-03 | 6.25E-02 |
| NUCB2    | 11440.99 | 0.70 | 0.57 | 1.65E-02 | 8.90E-02 |
| COG6     | 4600.16  | 0.70 | 0.42 | 1.06E-02 | 6.59E-02 |
| TONSL    | 436.03   | 0.70 | 0.36 | 6.58E-03 | 4.83E-02 |
| COP22    | 12184.77 | 0.70 | 0.57 | 1.65E-02 | 8.89E-02 |
| HYLS1    | 706.88   | 0.70 | 0.40 | 9.61E-03 | 6.21E-02 |
| ENAH     | 7190.16  | 0.70 | 0.45 | 1.24E-02 | 7.29E-02 |
| PRELID3A | 41.71    | 0.70 | 0.37 | 8.41E-03 | 5.68E-02 |
| PLN3     | 11422.97 | 0.70 | 0.24 | 7.85E-04 | 1.10E-02 |
| CNIH1    | 7797.34  | 0.70 | 0.24 | 5.88E-04 | 9.02E-03 |
| NAA40    | 1026.83  | 0.70 | 0.26 | 1.13E-03 | 1.43E-02 |
| CCZ1B    | 3887.13  | 0.69 | 0.37 | 8.24E-03 | 5.64E-02 |
| CTBS     | 3937.42  | 0.69 | 0.20 | 8.47E-05 | 2.22E-03 |
| ZNF587   | 913.81   | 0.69 | 0.19 | 5.03E-05 | 1.53E-03 |
| PEX12    | 752.04   | 0.69 | 0.26 | 1.40E-03 | 1.66E-02 |
| RARS     | 3937.07  | 0.69 | 0.19 | 5.65E-05 | 1.67E-03 |
| NINL     | 1157.15  | 0.69 | 0.54 | 1.78E-02 | 9.40E-02 |
| KDM2B    | 927.61   | 0.69 | 0.23 | 5.28E-04 | 8.36E-03 |
| PUS7L    | 1721.02  | 0.69 | 0.19 | 4.34E-05 | 1.36E-03 |
| SLC29A3  | 1814.41  | 0.69 | 0.29 | 2.79E-03 | 2.67E-02 |
| ODF2L    | 3970.94  | 0.69 | 0.37 | 8.14E-03 | 5.59E-02 |
| FADD     | 1069.01  | 0.69 | 0.39 | 9.21E-03 | 6.04E-02 |
| TMEM119  | 15776.71 | 0.69 | 0.65 | 1.90E-02 | 9.79E-02 |
| CA11     | 548.25   | 0.69 | 0.36 | 8.13E-03 | 5.59E-02 |
| ZNF260   | 2049.24  | 0.69 | 0.22 | 2.85E-04 | 5.46E-03 |
| HSD11B1L | 954.33   | 0.69 | 0.43 | 1.22E-02 | 7.22E-02 |
| RCC2     | 2838.54  | 0.69 | 0.44 | 1.31E-02 | 7.59E-02 |
| TMEM121  | 456.82   | 0.69 | 0.40 | 1.09E-02 | 6.72E-02 |
| FAM227A  | 130.98   | 0.69 | 0.40 | 1.13E-02 | 6.89E-02 |
| ATXN1    | 3219.09  | 0.68 | 0.16 | 5.47E-06 | 2.89E-04 |
| SQLE     | 1776.96  | 0.68 | 0.52 | 1.80E-02 | 9.47E-02 |
| PEX11B   | 1979.96  | 0.68 | 0.38 | 9.25E-03 | 6.05E-02 |
| GGACT    | 431.60   | 0.68 | 0.46 | 1.51E-02 | 8.38E-02 |
| NBPF15   | 2339.14  | 0.68 | 0.30 | 3.60E-03 | 3.18E-02 |
| TMEM223  | 1504.89  | 0.68 | 0.23 | 5.82E-04 | 8.94E-03 |
| ZBED6    | 1043.21  | 0.68 | 0.25 | 1.13E-03 | 1.43E-02 |
| FHOD1    | 1154.17  | 0.68 | 0.41 | 1.21E-02 | 7.18E-02 |
| FBXL8    | 899.21   | 0.68 | 0.42 | 1.29E-02 | 7.50E-02 |
| STXBP5   | 2740.29  | 0.68 | 0.38 | 1.06E-02 | 6.57E-02 |
| EPHB4    | 3391.51  | 0.68 | 0.16 | 5.20E-06 | 2.79E-04 |
| PLGRKT   | 1333.94  | 0.68 | 0.25 | 1.21E-03 | 1.50E-02 |
| ATP6V1D  | 4706.93  | 0.67 | 0.33 | 6.58E-03 | 4.83E-02 |
| LAPTM4B  | 5957.11  | 0.67 | 0.22 | 4.37E-04 | 7.36E-03 |
| ERCC2    | 498.63   | 0.67 | 0.14 | 7.31E-07 | 6.30E-05 |
| FEN1     | 958.40   | 0.67 | 0.46 | 1.64E-02 | 8.85E-02 |
| AP5S1    | 1100.97  | 0.67 | 0.16 | 6.56E-06 | 3.32E-04 |
| POLN     | 159.94   | 0.67 | 0.32 | 5.72E-03 | 4.38E-02 |
| RPL26L1  | 1537.24  | 0.67 | 0.20 | 2.11E-04 | 4.40E-03 |
| RAI14    | 4277.44  | 0.67 | 0.41 | 1.28E-02 | 7.44E-02 |
| TIMP1    | 74677.24 | 0.67 | 0.54 | 1.50E-02 | 8.34E-02 |
| EFNB1    | 4375.76  | 0.67 | 0.35 | 9.05E-03 | 5.97E-02 |
| ACP2     | 2913.25  | 0.67 | 0.37 | 1.04E-02 | 6.54E-02 |
| SLC35A2  | 2417.49  | 0.67 | 0.29 | 3.87E-03 | 3.36E-02 |
| WHRN     | 779.94   | 0.67 | 0.26 | 1.82E-03 | 1.99E-02 |
| CCDC34   | 436.40   | 0.67 | 0.33 | 6.79E-03 | 4.94E-02 |
| PCNA     | 3589.19  | 0.67 | 0.26 | 1.74E-03 | 1.94E-02 |
| ETV2     | 70.65    | 0.67 | 0.46 | 1.79E-02 | 9.44E-02 |
| HMBS     | 1328.39  | 0.66 | 0.36 | 9.62E-03 | 6.21E-02 |
| ZNF485   | 219.62   | 0.66 | 0.20 | 1.80E-04 | 3.94E-03 |
| PPP1R9B  | 490.08   | 0.66 | 0.32 | 5.90E-03 | 4.49E-02 |

|           |          |      |      |          |          |
|-----------|----------|------|------|----------|----------|
| ITPR2     | 1744.94  | 0.66 | 0.50 | 1.91E-02 | 9.84E-02 |
| IBTK      | 5087.89  | 0.66 | 0.15 | 1.32E-06 | 1.01E-04 |
| MGAT4B    | 3622.72  | 0.66 | 0.45 | 1.55E-02 | 8.55E-02 |
| ARF4      | 44829.90 | 0.66 | 0.41 | 1.22E-02 | 7.23E-02 |
| MED8      | 3960.12  | 0.66 | 0.22 | 6.06E-04 | 9.14E-03 |
| TMEM167A  | 10368.64 | 0.66 | 0.45 | 1.61E-02 | 8.77E-02 |
| AKAP7     | 674.17   | 0.66 | 0.31 | 5.83E-03 | 4.44E-02 |
| TMEM65    | 1149.23  | 0.66 | 0.36 | 9.90E-03 | 6.35E-02 |
| C19orf48  | 1577.55  | 0.66 | 0.24 | 1.37E-03 | 1.64E-02 |
| MOSPD1    | 1338.98  | 0.66 | 0.25 | 1.60E-03 | 1.82E-02 |
| RHNO1     | 1422.08  | 0.66 | 0.20 | 1.92E-04 | 4.13E-03 |
| UBXN8     | 767.47   | 0.65 | 0.29 | 3.86E-03 | 3.36E-02 |
| HNMT      | 6644.30  | 0.65 | 0.34 | 8.58E-03 | 5.78E-02 |
| IFT80     | 2454.51  | 0.65 | 0.46 | 1.82E-02 | 9.55E-02 |
| MFAP3     | 1763.97  | 0.65 | 0.23 | 7.42E-04 | 1.06E-02 |
| CCDC18    | 462.93   | 0.65 | 0.32 | 7.07E-03 | 5.07E-02 |
| TMEM87B   | 3178.83  | 0.65 | 0.23 | 8.04E-04 | 1.12E-02 |
| C20orf96  | 320.04   | 0.65 | 0.28 | 4.17E-03 | 3.54E-02 |
| MAP4K4    | 15542.85 | 0.65 | 0.87 | 1.87E-02 | 9.68E-02 |
| PPP1R37   | 420.66   | 0.65 | 0.40 | 1.49E-02 | 8.32E-02 |
| ZNF467    | 720.59   | 0.65 | 1.39 | 1.00E-02 | 6.37E-02 |
| AGPAT3    | 1740.77  | 0.64 | 0.29 | 4.72E-03 | 3.86E-02 |
| ISCA2     | 1662.32  | 0.64 | 0.34 | 1.01E-02 | 6.38E-02 |
| ZNF784    | 174.62   | 0.64 | 0.43 | 1.71E-02 | 9.15E-02 |
| NHSL2     | 2816.25  | 0.64 | 0.20 | 2.60E-04 | 5.12E-03 |
| RNASE10   | 102.65   | 0.64 | 0.33 | 8.73E-03 | 5.83E-02 |
| NUS1      | 2958.34  | 0.64 | 0.35 | 1.07E-02 | 6.63E-02 |
| TPM4      | 67910.60 | 0.64 | 0.26 | 2.38E-03 | 2.42E-02 |
| MCTS1     | 2876.14  | 0.64 | 0.20 | 3.90E-04 | 6.82E-03 |
| VIPAS39   | 1523.26  | 0.64 | 0.10 | 6.92E-12 | 3.93E-09 |
| STK16     | 776.88   | 0.64 | 0.31 | 6.59E-03 | 4.83E-02 |
| FBXO41    | 123.26   | 0.64 | 1.05 | 1.57E-02 | 8.62E-02 |
| ZNF117    | 893.49   | 0.64 | 0.41 | 1.66E-02 | 8.93E-02 |
| DNAJC1    | 3207.29  | 0.63 | 0.23 | 1.39E-03 | 1.65E-02 |
| SOX4      | 10408.63 | 0.63 | 0.30 | 6.40E-03 | 4.74E-02 |
| UROS      | 3796.84  | 0.63 | 0.29 | 5.08E-03 | 4.06E-02 |
| RAB27A    | 2028.78  | 0.63 | 0.40 | 1.67E-02 | 8.99E-02 |
| UBTD1     | 2156.64  | 0.63 | 0.33 | 1.03E-02 | 6.50E-02 |
| NMNAT1    | 942.33   | 0.63 | 0.25 | 2.75E-03 | 2.65E-02 |
| GOLGA5    | 6576.83  | 0.63 | 0.35 | 1.22E-02 | 7.22E-02 |
| TSPAN5    | 1337.33  | 0.62 | 0.95 | 1.75E-02 | 9.29E-02 |
| MPDU1     | 3701.06  | 0.62 | 0.35 | 1.31E-02 | 7.59E-02 |
| KCTD18    | 1702.20  | 0.62 | 0.19 | 2.19E-04 | 4.50E-03 |
| KLK10     | 154.79   | 0.62 | 1.17 | 1.29E-02 | 7.49E-02 |
| ALG5      | 3441.66  | 0.62 | 0.17 | 6.28E-05 | 1.82E-03 |
| YDJC      | 905.38   | 0.62 | 0.34 | 1.11E-02 | 6.81E-02 |
| MGAT2     | 3755.62  | 0.62 | 0.39 | 1.67E-02 | 8.98E-02 |
| C16orf87  | 1178.53  | 0.62 | 0.24 | 2.05E-03 | 2.17E-02 |
| ZNF578    | 94.65    | 0.62 | 0.35 | 1.39E-02 | 7.92E-02 |
| COA6      | 1158.45  | 0.62 | 0.30 | 6.90E-03 | 4.99E-02 |
| ALKBH4    | 1076.47  | 0.62 | 0.27 | 4.20E-03 | 3.55E-02 |
| EML4      | 3003.82  | 0.62 | 0.40 | 1.79E-02 | 9.43E-02 |
| ZNF69     | 332.23   | 0.62 | 0.27 | 4.88E-03 | 3.95E-02 |
| ANKIB1    | 2804.67  | 0.62 | 0.31 | 8.87E-03 | 5.90E-02 |
| ZNF254    | 1768.68  | 0.61 | 0.18 | 2.06E-04 | 4.35E-03 |
| MORF4L2   | 24859.26 | 0.61 | 0.25 | 3.08E-03 | 2.86E-02 |
| P4HB      | 65037.84 | 0.61 | 0.40 | 1.76E-02 | 9.32E-02 |
| ASTE1     | 1124.46  | 0.61 | 0.24 | 2.63E-03 | 2.59E-02 |
| TMED2     | 46161.56 | 0.61 | 0.27 | 5.28E-03 | 4.18E-02 |
| ZNF223    | 381.59   | 0.61 | 0.27 | 4.63E-03 | 3.82E-02 |
| TMEM208   | 2709.22  | 0.61 | 0.14 | 1.84E-06 | 1.28E-04 |
| ZNF30     | 305.85   | 0.61 | 0.34 | 1.39E-02 | 7.92E-02 |
| ZNF616    | 1077.20  | 0.60 | 0.37 | 1.70E-02 | 9.10E-02 |
| MPHOSPH10 | 3025.20  | 0.60 | 0.26 | 4.22E-03 | 3.56E-02 |
| MYDGF     | 12234.34 | 0.60 | 0.32 | 1.11E-02 | 6.81E-02 |
| PIGW      | 620.35   | 0.60 | 0.23 | 2.19E-03 | 2.27E-02 |
| TMEM243   | 3894.62  | 0.60 | 0.12 | 1.66E-07 | 2.01E-05 |
| SEC22B    | 8662.40  | 0.60 | 0.34 | 1.32E-02 | 7.60E-02 |
| HTR2A     | 979.24   | 0.60 | 1.08 | 1.35E-02 | 7.77E-02 |
| MNS1      | 463.82   | 0.60 | 0.35 | 1.58E-02 | 8.65E-02 |
| CNPY2     | 4702.85  | 0.60 | 0.13 | 8.91E-07 | 7.31E-05 |
| ZNF616    | 469.78   | 0.60 | 0.27 | 5.47E-03 | 4.26E-02 |
| TRIQK     | 3145.73  | 0.59 | 0.32 | 1.20E-02 | 7.16E-02 |
| TEN1      | 816.09   | 0.59 | 0.23 | 2.47E-03 | 2.48E-02 |
| KDM4D     | 123.28   | 0.59 | 0.29 | 9.13E-03 | 6.00E-02 |
| MED18     | 437.20   | 0.59 | 0.22 | 1.63E-03 | 1.85E-02 |
| GGCT      | 1449.32  | 0.59 | 0.23 | 2.10E-03 | 2.21E-02 |
| EFCAB11   | 547.72   | 0.59 | 0.20 | 8.10E-04 | 1.13E-02 |
| G6PC3     | 3998.91  | 0.59 | 0.25 | 4.37E-03 | 3.66E-02 |
| EFNB2     | 1663.53  | 0.59 | 1.00 | 1.59E-02 | 8.70E-02 |
| GAR1      | 1028.38  | 0.59 | 0.23 | 2.57E-03 | 2.55E-02 |
| TBC1D32   | 581.24   | 0.59 | 0.31 | 1.08E-02 | 6.67E-02 |
| PEA15     | 6280.69  | 0.59 | 0.32 | 1.30E-02 | 7.53E-02 |
| SHIM15    | 4820.27  | 0.59 | 0.22 | 1.88E-03 | 2.05E-02 |
| TMEM141   | 1713.00  | 0.58 | 0.25 | 4.87E-03 | 3.95E-02 |
| CMPK2     | 522.11   | 0.58 | 0.35 | 1.82E-02 | 9.53E-02 |
| MIA2      | 2753.46  | 0.58 | 0.17 | 1.18E-04 | 2.80E-03 |
| FHL3      | 4106.04  | 0.58 | 0.21 | 1.31E-03 | 1.58E-02 |
| DBR1      | 1563.79  | 0.58 | 0.26 | 5.63E-03 | 4.33E-02 |
| THUMP3    | 1671.44  | 0.58 | 0.15 | 2.05E-05 | 7.78E-04 |
| RAB9A     | 2929.13  | 0.58 | 0.34 | 1.63E-02 | 8.82E-02 |
| ADAMTS2   | 33467.83 | 0.58 | 0.89 | 1.60E-02 | 8.72E-02 |
| PKM       | 53444.12 | 0.58 | 0.31 | 1.13E-02 | 6.89E-02 |
| GD12      | 19399.66 | 0.58 | 0.26 | 6.10E-03 | 4.58E-02 |
| DAP       | 16125.63 | 0.58 | 0.25 | 4.62E-03 | 3.80E-02 |
| ZNF514    | 558.78   | 0.58 | 0.29 | 9.24E-03 | 6.05E-02 |
| AMZ2      | 4874.44  | 0.58 | 0.10 | 2.35E-09 | 5.54E-07 |
| ALG1      | 2623.42  | 0.58 | 0.30 | 1.07E-02 | 6.63E-02 |
| SPC24     | 117.88   | 0.58 | 0.35 | 1.87E-02 | 9.70E-02 |
| TARBP2    | 1259.43  | 0.58 | 0.26 | 5.78E-03 | 4.41E-02 |
| THNSL1    | 687.83   | 0.58 | 0.34 | 1.75E-02 | 9.29E-02 |
| WNT3      | 202.30   | 0.58 | 0.35 | 1.80E-02 | 9.45E-02 |



|           |          |      |      |          |          |
|-----------|----------|------|------|----------|----------|
| MTERF1    | 733.27   | 0.58 | 0.22 | 2.43E-03 | 2.46E-02 |
| LRRC1     | 754.53   | 0.58 | 0.35 | 1.85E-02 | 9.62E-02 |
| SHMT2     | 3103.48  | 0.58 | 0.19 | 7.72E-04 | 1.09E-02 |
| ZNF720    | 1446.10  | 0.58 | 0.17 | 1.41E-04 | 3.22E-03 |
| PPCS      | 4793.23  | 0.58 | 0.08 | 2.09E-12 | 1.45E-09 |
| HOXB7     | 1015.25  | 0.58 | 0.27 | 7.63E-03 | 5.36E-02 |
| ZNF827    | 1276.08  | 0.58 | 0.29 | 1.05E-02 | 6.56E-02 |
| ZNF814    | 649.21   | 0.58 | 0.30 | 1.21E-02 | 7.19E-02 |
| COQ2      | 1113.04  | 0.58 | 0.21 | 1.54E-03 | 1.77E-02 |
| BNIP1     | 731.15   | 0.57 | 0.21 | 1.76E-03 | 1.96E-02 |
| PROX2     | 9.54     | 0.57 | 1.33 | 8.57E-03 | 5.77E-02 |
| AKR1A1    | 9239.92  | 0.57 | 0.22 | 2.42E-03 | 2.45E-02 |
| COMMD9    | 3219.99  | 0.57 | 0.27 | 8.14E-03 | 5.59E-02 |
| BROX      | 4107.54  | 0.57 | 0.22 | 2.29E-03 | 2.35E-02 |
| ZNHIT1    | 5479.38  | 0.57 | 0.21 | 1.53E-03 | 1.77E-02 |
| MLST8     | 3150.95  | 0.57 | 0.11 | 3.77E-08 | 5.78E-06 |
| NME2      | 10708.11 | 0.57 | 0.34 | 1.79E-02 | 9.45E-02 |
| SLFN13    | 509.92   | 0.57 | 0.31 | 1.30E-02 | 7.53E-02 |
| JTB       | 13518.19 | 0.57 | 0.25 | 5.36E-03 | 4.22E-02 |
| GSR       | 2972.95  | 0.57 | 0.22 | 2.56E-03 | 2.55E-02 |
| NABP2     | 462.26   | 0.57 | 0.33 | 1.75E-02 | 9.31E-02 |
| SLC39A4   | 495.07   | 0.57 | 0.29 | 1.09E-02 | 6.73E-02 |
| SCRN3     | 1360.86  | 0.57 | 0.16 | 1.02E-04 | 2.55E-03 |
| SPINK9    | 97.35    | 0.57 | 0.25 | 5.59E-03 | 4.32E-02 |
| E2F5      | 269.92   | 0.57 | 0.28 | 1.01E-02 | 6.39E-02 |
| C19orf24  | 1576.44  | 0.57 | 0.18 | 5.15E-04 | 8.19E-03 |
| TDRD3     | 1437.55  | 0.57 | 0.30 | 1.21E-02 | 7.21E-02 |
| PIGBOS1   | 934.34   | 0.57 | 0.18 | 5.62E-04 | 8.75E-03 |
| IDH1      | 8054.56  | 0.56 | 0.29 | 1.05E-02 | 6.56E-02 |
| ZNF419    | 699.84   | 0.56 | 0.32 | 1.63E-02 | 8.82E-02 |
| AIDA      | 6541.61  | 0.56 | 0.33 | 1.86E-02 | 9.68E-02 |
| SPC25     | 172.01   | 0.56 | 0.99 | 1.55E-02 | 8.56E-02 |
| NLK       | 235.82   | 0.56 | 0.17 | 3.70E-04 | 6.59E-03 |
| RARS2     | 5799.62  | 0.56 | 0.32 | 1.58E-02 | 8.67E-02 |
| ZNF969    | 729.21   | 0.56 | 0.21 | 2.31E-03 | 2.36E-02 |
| SLC38A7   | 2193.90  | 0.56 | 0.27 | 8.21E-03 | 5.62E-02 |
| CNEP1R1   | 2155.50  | 0.56 | 0.16 | 1.20E-04 | 2.85E-03 |
| OR5A1     | 53.72    | 0.56 | 0.28 | 1.19E-02 | 7.13E-02 |
| L3HYPDH   | 2282.26  | 0.56 | 0.23 | 3.38E-03 | 3.04E-02 |
| COMMD8    | 2339.97  | 0.56 | 0.29 | 1.29E-02 | 7.50E-02 |
| LGALS3    | 32432.22 | 0.56 | 0.20 | 1.25E-03 | 1.53E-02 |
| ZNF550    | 1010.03  | 0.56 | 0.23 | 4.23E-03 | 3.57E-02 |
| LTC4S     | 613.25   | 0.56 | 0.91 | 1.85E-02 | 9.62E-02 |
| SYT3      | 37.75    | 0.56 | 0.93 | 1.85E-02 | 9.63E-02 |
| TXNDC17   | 2449.64  | 0.56 | 0.28 | 1.13E-02 | 6.89E-02 |
| ZNF776    | 943.13   | 0.56 | 0.27 | 9.10E-03 | 5.99E-02 |
| RFESD     | 202.77   | 0.55 | 0.30 | 1.51E-02 | 8.38E-02 |
| SULT1B1   | 758.88   | 0.55 | 1.06 | 1.16E-02 | 6.98E-02 |
| CCDC106   | 1015.97  | 0.55 | 0.18 | 7.27E-04 | 1.05E-02 |
| ZIK1      | 458.95   | 0.55 | 0.31 | 1.73E-02 | 9.23E-02 |
| TMEM106A  | 782.98   | 0.55 | 0.28 | 1.19E-02 | 7.11E-02 |
| ERCC8     | 940.89   | 0.55 | 0.17 | 4.47E-04 | 7.49E-03 |
| JRKL      | 1570.40  | 0.55 | 0.20 | 1.86E-03 | 2.03E-02 |
| C8orf76   | 1187.82  | 0.55 | 0.28 | 1.25E-02 | 7.36E-02 |
| RHBDD3    | 1751.40  | 0.55 | 0.16 | 1.81E-04 | 3.95E-03 |
| METTL18   | 557.97   | 0.55 | 0.30 | 1.61E-02 | 8.77E-02 |
| ZNF562    | 1110.02  | 0.55 | 0.30 | 1.61E-02 | 8.77E-02 |
| AP5M1     | 3545.37  | 0.55 | 0.19 | 1.18E-03 | 1.47E-02 |
| EIF2AK1   | 9207.34  | 0.54 | 0.21 | 2.85E-03 | 2.71E-02 |
| IFI44     | 1782.78  | 0.54 | 0.30 | 1.63E-02 | 8.82E-02 |
| ADAM32    | 362.33   | 0.54 | 0.26 | 9.87E-03 | 6.33E-02 |
| CUTA      | 9299.63  | 0.54 | 0.22 | 3.35E-03 | 3.03E-02 |
| UCHL3     | 1726.28  | 0.54 | 0.31 | 1.89E-02 | 9.75E-02 |
| TRPM7     | 3874.80  | 0.54 | 0.26 | 8.92E-03 | 5.92E-02 |
| LGALS1    | 67604.99 | 0.54 | 0.30 | 1.90E-02 | 9.81E-02 |
| EEF1A2    | 38.10    | 0.54 | 1.26 | 5.36E-03 | 4.22E-02 |
| IFI27L2   | 1938.31  | 0.54 | 0.26 | 1.00E-02 | 6.38E-02 |
| GLMN      | 761.77   | 0.54 | 0.24 | 6.03E-03 | 4.55E-02 |
| TCEAL9    | 12829.92 | 0.54 | 0.29 | 1.45E-02 | 8.17E-02 |
| RBAK      | 1433.51  | 0.54 | 0.22 | 4.18E-03 | 3.54E-02 |
| VPS25     | 3085.83  | 0.54 | 0.15 | 1.04E-04 | 2.58E-03 |
| ZBED3     | 2151.56  | 0.54 | 0.30 | 1.73E-02 | 9.21E-02 |
| ZNF107    | 704.32   | 0.54 | 0.17 | 4.27E-04 | 7.23E-03 |
| DPAGT1    | 3571.06  | 0.54 | 0.17 | 6.11E-04 | 9.19E-03 |
| PRKCSH    | 6437.04  | 0.53 | 0.26 | 1.09E-02 | 6.73E-02 |
| TFB2M     | 1344.31  | 0.53 | 0.21 | 2.66E-03 | 2.62E-02 |
| ZNF461    | 445.44   | 0.53 | 0.27 | 1.26E-02 | 7.40E-02 |
| MRS2      | 2168.49  | 0.53 | 0.17 | 7.27E-04 | 1.05E-02 |
| MIER2     | 1360.41  | 0.53 | 0.27 | 1.26E-02 | 7.39E-02 |
| ZNF189    | 653.41   | 0.53 | 0.24 | 7.28E-03 | 5.18E-02 |
| ZSCAN2    | 447.50   | 0.53 | 0.19 | 1.78E-03 | 1.96E-02 |
| LZTFL1    | 1934.05  | 0.53 | 0.29 | 1.61E-02 | 8.76E-02 |
| CD2AP     | 1783.21  | 0.53 | 0.20 | 2.56E-03 | 2.55E-02 |
| C12orf76  | 732.52   | 0.53 | 0.21 | 3.56E-03 | 3.17E-02 |
| SPAST     | 1871.38  | 0.53 | 0.26 | 1.04E-02 | 6.52E-02 |
| ANAPC13   | 6336.66  | 0.53 | 0.11 | 4.46E-07 | 4.28E-05 |
| EDARADD   | 122.00   | 0.53 | 1.75 | 2.27E-04 | 4.61E-03 |
| B9D2      | 328.01   | 0.53 | 0.24 | 8.11E-03 | 5.58E-02 |
| CHD3      | 4022.92  | 0.52 | 0.11 | 1.67E-06 | 1.21E-04 |
| TRIM27    | 4650.71  | 0.52 | 0.17 | 5.40E-04 | 8.48E-03 |
| RCBTB2    | 3083.38  | 0.52 | 0.10 | 3.36E-08 | 5.21E-06 |
| CDK7      | 1461.97  | 0.52 | 0.21 | 3.25E-03 | 2.95E-02 |
| B3GALT6   | 2970.30  | 0.52 | 0.18 | 1.19E-03 | 1.48E-02 |
| RPP38     | 946.26   | 0.52 | 0.23 | 6.95E-03 | 5.02E-02 |
| CHCHD1    | 1523.10  | 0.52 | 0.23 | 5.92E-03 | 4.50E-02 |
| PIGC      | 3467.75  | 0.52 | 0.21 | 4.48E-03 | 3.72E-02 |
| SFXN5     | 1041.71  | 0.52 | 0.27 | 1.39E-02 | 7.92E-02 |
| TMEM39A   | 5444.47  | 0.52 | 0.29 | 1.81E-02 | 9.51E-02 |
| C14orf119 | 5163.51  | 0.52 | 0.24 | 8.89E-03 | 5.91E-02 |
| B3GNTL1   | 407.13   | 0.52 | 0.23 | 7.83E-03 | 5.45E-02 |
| FAM200A   | 793.18   | 0.52 | 0.27 | 1.53E-02 | 8.48E-02 |
| C18orf21  | 534.18   | 0.52 | 0.26 | 1.23E-02 | 7.26E-02 |

|            |          |      |      |          |          |
|------------|----------|------|------|----------|----------|
| PEAK1      | 5182.24  | 0.52 | 0.22 | 5.81E-03 | 4.44E-02 |
| PRIM2      | 798.19   | 0.52 | 0.27 | 1.52E-02 | 8.41E-02 |
| TGDS       | 1342.12  | 0.52 | 0.19 | 1.77E-03 | 1.96E-02 |
| TMEM260    | 2114.33  | 0.51 | 0.14 | 1.23E-04 | 2.89E-03 |
| FAM114A2   | 2456.55  | 0.51 | 0.22 | 6.08E-03 | 4.57E-02 |
| TACO1      | 1098.17  | 0.51 | 0.16 | 3.18E-04 | 5.92E-03 |
| AP3B1      | 5657.08  | 0.51 | 0.22 | 5.95E-03 | 4.51E-02 |
| APH1A      | 4528.44  | 0.51 | 0.25 | 1.13E-02 | 6.89E-02 |
| TOR1AIP2   | 3929.80  | 0.51 | 0.25 | 1.10E-02 | 6.76E-02 |
| CGREF1     | 2351.62  | 0.51 | 1.00 | 9.58E-03 | 6.19E-02 |
| SLC25A16   | 783.96   | 0.51 | 0.15 | 2.81E-04 | 5.40E-03 |
| DDX42      | 2691.25  | 0.51 | 0.26 | 1.40E-02 | 7.98E-02 |
| ZFP30      | 562.42   | 0.51 | 0.16 | 5.94E-04 | 9.06E-03 |
| ATP2C1     | 4856.20  | 0.51 | 0.26 | 1.46E-02 | 8.19E-02 |
| POLA2      | 587.85   | 0.51 | 0.26 | 1.41E-02 | 8.01E-02 |
| DECR1      | 5352.22  | 0.51 | 0.23 | 7.13E-03 | 5.11E-02 |
| FOXP1      | 12943.84 | 0.51 | 0.17 | 1.07E-03 | 1.38E-02 |
| NXT2       | 1245.13  | 0.51 | 0.19 | 2.35E-03 | 2.39E-02 |
| EBP        | 1441.51  | 0.51 | 0.19 | 2.45E-03 | 2.47E-02 |
| CBX3       | 7302.65  | 0.51 | 0.19 | 2.87E-03 | 2.72E-02 |
| ZCCHC7     | 2236.12  | 0.51 | 0.12 | 5.18E-06 | 2.79E-04 |
| FAH        | 2690.41  | 0.51 | 1.09 | 5.08E-03 | 4.06E-02 |
| GLB1       | 7386.17  | 0.51 | 0.25 | 1.23E-02 | 7.25E-02 |
| TRNT1      | 1761.97  | 0.50 | 0.25 | 1.17E-02 | 7.02E-02 |
| ZNF180     | 839.84   | 0.50 | 0.26 | 1.45E-02 | 8.17E-02 |
| RGS17      | 132.96   | 0.50 | 0.85 | 1.88E-02 | 9.73E-02 |
| MARCKSL1   | 11813.60 | 0.50 | 0.81 | 1.94E-02 | 9.94E-02 |
| AGGF1      | 3205.55  | 0.50 | 0.14 | 8.45E-05 | 2.22E-03 |
| ZNF490     | 266.61   | 0.50 | 0.26 | 1.40E-02 | 7.97E-02 |
| OVC22      | 1236.42  | 0.50 | 0.19 | 2.89E-03 | 2.62E-02 |
| SEC81G     | 5335.01  | 0.50 | 0.19 | 2.86E-03 | 2.61E-02 |
| ZSCAN20    | 241.88   | 0.50 | 0.23 | 8.42E-03 | 5.69E-02 |
| TAOK2      | 2844.37  | 0.50 | 0.26 | 1.59E-02 | 8.68E-02 |
| CCDC90B    | 4964.44  | 0.50 | 0.16 | 6.15E-04 | 9.24E-03 |
| NPTX2      | 464.73   | 0.50 | 1.11 | 3.79E-03 | 3.32E-02 |
| PDI3       | 54467.48 | 0.50 | 0.23 | 9.29E-03 | 6.07E-02 |
| EME1       | 119.16   | 0.50 | 0.88 | 1.57E-02 | 8.62E-02 |
| B4GALT7    | 2297.07  | 0.50 | 0.19 | 2.35E-03 | 2.39E-02 |
| MYO1B      | 14724.95 | 0.50 | 0.21 | 5.55E-03 | 4.29E-02 |
| SHANK2     | 42.61    | 0.50 | 0.94 | 1.16E-02 | 7.00E-02 |
| TRA2A      | 3345.82  | 0.50 | 0.21 | 6.49E-03 | 4.79E-02 |
| GPATCH2    | 1236.44  | 0.50 | 0.17 | 1.24E-03 | 1.52E-02 |
| SAC3D1     | 882.84   | 0.50 | 0.23 | 8.67E-03 | 5.81E-02 |
| LAGE3      | 954.34   | 0.50 | 0.21 | 5.15E-03 | 4.10E-02 |
| C3orf38    | 2264.77  | 0.49 | 0.23 | 9.09E-03 | 5.99E-02 |
| SMIM20     | 1923.49  | 0.49 | 0.20 | 4.47E-03 | 3.72E-02 |
| CASP6      | 1336.90  | 0.49 | 0.24 | 1.28E-02 | 7.46E-02 |
| TATDN2     | 1389.23  | 0.49 | 0.26 | 1.68E-02 | 9.01E-02 |
| RAP2A      | 3625.67  | 0.49 | 0.24 | 1.18E-02 | 7.06E-02 |
| PPIC       | 23173.86 | 0.49 | 0.75 | 1.93E-02 | 9.90E-02 |
| MRPS33     | 1234.81  | 0.49 | 0.20 | 4.57E-03 | 3.78E-02 |
| DNAJC4     | 2125.03  | 0.49 | 0.22 | 7.41E-03 | 5.24E-02 |
| PGLS       | 2946.59  | 0.49 | 0.24 | 1.18E-02 | 7.06E-02 |
| SRP9       | 18588.62 | 0.49 | 0.13 | 8.71E-05 | 2.25E-03 |
| CSGALNACT2 | 5414.97  | 0.49 | 0.25 | 1.53E-02 | 8.47E-02 |
| WDFY1      | 9030.44  | 0.49 | 0.17 | 1.30E-03 | 1.58E-02 |
| SLFN12L    | 157.58   | 0.49 | 0.92 | 1.10E-02 | 6.76E-02 |
| NCK1       | 3502.07  | 0.49 | 0.19 | 3.42E-03 | 3.06E-02 |
| IMPACT     | 3731.85  | 0.48 | 0.14 | 2.96E-04 | 5.61E-03 |
| DERL2      | 4883.65  | 0.48 | 0.19 | 3.41E-03 | 3.06E-02 |
| MR1        | 1701.87  | 0.48 | 0.25 | 1.59E-02 | 8.70E-02 |
| TBC1D23    | 6371.45  | 0.48 | 0.22 | 9.93E-03 | 6.36E-02 |
| TEX11      | 16.70    | 0.48 | 1.07 | 2.86E-03 | 2.71E-02 |
| RWDD2A     | 954.88   | 0.48 | 0.19 | 3.43E-03 | 3.07E-02 |
| SUPT20H    | 4018.32  | 0.48 | 0.15 | 4.12E-04 | 7.08E-03 |
| PDZD11     | 2869.80  | 0.48 | 0.25 | 1.78E-02 | 9.40E-02 |
| SCN11A     | 95.22    | 0.48 | 0.96 | 6.57E-03 | 4.83E-02 |
| CCDC110    | 537.77   | 0.48 | 0.85 | 1.44E-02 | 8.13E-02 |
| RGS4       | 4649.99  | 0.48 | 1.00 | 3.84E-03 | 3.34E-02 |
| S100PBP    | 2753.24  | 0.48 | 0.15 | 4.83E-04 | 7.90E-03 |
| COX18      | 495.16   | 0.48 | 0.19 | 3.82E-03 | 3.33E-02 |
| OXLD1      | 1271.58  | 0.48 | 0.14 | 2.79E-04 | 5.38E-03 |
| ALG3       | 3179.62  | 0.48 | 0.18 | 2.71E-03 | 2.63E-02 |
| MYL6B      | 1918.01  | 0.48 | 0.23 | 1.22E-02 | 7.24E-02 |
| COX16      | 2671.49  | 0.47 | 0.13 | 1.09E-04 | 2.67E-03 |
| TMEM42     | 1313.10  | 0.47 | 0.21 | 7.31E-03 | 5.19E-02 |
| LINS1      | 1327.15  | 0.47 | 0.21 | 7.15E-03 | 5.12E-02 |
| VTA1       | 6045.60  | 0.47 | 0.21 | 8.39E-03 | 5.68E-02 |
| CDK19      | 676.08   | 0.47 | 0.21 | 8.15E-03 | 5.60E-02 |
| LGALS2     | 461.56   | 0.47 | 1.21 | 8.16E-05 | 2.18E-03 |
| KDEL1      | 11981.39 | 0.47 | 0.24 | 1.53E-02 | 8.49E-02 |
| EVA1B      | 3240.48  | 0.47 | 0.18 | 3.29E-03 | 2.99E-02 |
| COMMD3     | 3727.63  | 0.47 | 0.09 | 1.56E-08 | 2.74E-06 |
| ASCC3      | 4324.46  | 0.47 | 0.16 | 1.04E-03 | 1.36E-02 |
| SCFD1      | 7625.92  | 0.47 | 0.17 | 2.45E-03 | 2.48E-02 |
| KDM8       | 438.49   | 0.47 | 0.19 | 4.27E-03 | 3.59E-02 |
| RNF113A    | 886.50   | 0.47 | 0.15 | 9.61E-04 | 1.27E-02 |
| TRAPPC1    | 3919.67  | 0.47 | 0.18 | 4.10E-03 | 3.50E-02 |
| SAYS1D1    | 1503.95  | 0.47 | 0.21 | 8.86E-03 | 5.90E-02 |
| TMEFF1     | 108.65   | 0.47 | 0.95 | 4.78E-03 | 3.90E-02 |
| ADAT1      | 1241.55  | 0.47 | 0.15 | 7.32E-04 | 1.05E-02 |
| COPZ1      | 9781.28  | 0.46 | 0.18 | 3.20E-03 | 2.93E-02 |
| NFXL1      | 1163.08  | 0.46 | 0.16 | 1.54E-03 | 1.77E-02 |
| ALG14      | 1336.99  | 0.46 | 0.18 | 4.01E-03 | 3.45E-02 |
| PPHLN1     | 4239.11  | 0.46 | 0.12 | 2.40E-05 | 8.82E-04 |
| GEMIN6     | 583.29   | 0.46 | 0.20 | 8.01E-03 | 5.53E-02 |
| NEURL4     | 507.17   | 0.46 | 0.14 | 4.03E-04 | 6.96E-03 |
| RBM4B      | 2157.92  | 0.46 | 0.23 | 1.43E-02 | 8.08E-02 |
| SUPT4H1    | 3693.63  | 0.46 | 0.17 | 3.01E-03 | 2.82E-02 |
| GTPBP8     | 858.36   | 0.46 | 0.18 | 4.73E-03 | 3.87E-02 |
| C1QL1      | 248.70   | 0.46 | 0.98 | 2.00E-03 | 2.14E-02 |
| TMEM219    | 8374.08  | 0.46 | 0.12 | 3.32E-05 | 1.12E-03 |

|          |            |      |      |          |          |
|----------|------------|------|------|----------|----------|
| MMS22L   | 588.57     | 0.46 | 0.22 | 1.24E-02 | 7.32E-02 |
| IL27RA   | 927.83     | 0.45 | 0.92 | 4.05E-03 | 3.47E-02 |
| GSK3B    | 2487.05    | 0.45 | 0.15 | 8.59E-04 | 1.18E-02 |
| FAHD1    | 1622.74    | 0.45 | 0.18 | 4.42E-03 | 3.69E-02 |
| DAD1     | 16794.70   | 0.45 | 0.21 | 1.16E-02 | 7.01E-02 |
| LOX      | 39004.88   | 0.45 | 0.78 | 1.30E-02 | 7.53E-02 |
| ADM2     | 65.80      | 0.45 | 0.83 | 1.19E-02 | 7.11E-02 |
| COL1A2   | 3678459.70 | 0.45 | 0.76 | 2.36E-04 | 4.76E-03 |
| NAGK     | 5564.84    | 0.45 | 0.21 | 1.06E-02 | 6.59E-02 |
| SUSD3    | 391.13     | 0.45 | 0.90 | 4.81E-03 | 3.92E-02 |
| FIBP     | 4670.99    | 0.45 | 0.20 | 1.00E-02 | 6.38E-02 |
| CHRNA9   | 8.06       | 0.45 | 1.07 | 5.78E-05 | 1.70E-03 |
| HAUS3    | 1987.12    | 0.45 | 0.10 | 3.29E-06 | 2.00E-04 |
| ZNF811   | 1206.22    | 0.45 | 0.18 | 5.20E-03 | 4.13E-02 |
| MTRF1    | 714.27     | 0.45 | 0.23 | 1.70E-02 | 9.09E-02 |
| ESCO2    | 184.44     | 0.45 | 0.85 | 8.52E-03 | 5.75E-02 |
| RBM45    | 766.16     | 0.45 | 0.20 | 9.82E-03 | 6.32E-02 |
| ANKRD49  | 1369.94    | 0.45 | 0.23 | 1.65E-02 | 8.90E-02 |
| ARL14EP  | 2620.89    | 0.45 | 0.16 | 1.57E-03 | 1.80E-02 |
| TMEM216  | 1695.73    | 0.45 | 0.21 | 1.28E-02 | 7.45E-02 |
| PMCH     | 7.46       | 0.45 | 1.04 | 8.08E-05 | 2.16E-03 |
| YARS2    | 1376.81    | 0.45 | 0.19 | 6.93E-03 | 5.01E-02 |
| FUNDC1   | 997.12     | 0.45 | 0.16 | 1.89E-03 | 2.06E-02 |
| FKBP3    | 4310.09    | 0.45 | 0.19 | 7.36E-03 | 5.21E-02 |
| KRCC1    | 2638.68    | 0.44 | 0.20 | 1.16E-02 | 7.00E-02 |
| PIPSK2   | 5534.66    | 0.44 | 0.14 | 5.51E-04 | 8.63E-03 |
| SH3GLB1  | 12787.65   | 0.44 | 0.18 | 5.39E-03 | 4.22E-02 |
| NUP37    | 1607.34    | 0.44 | 0.21 | 1.24E-02 | 7.29E-02 |
| C1orf131 | 1025.82    | 0.44 | 0.16 | 2.43E-03 | 2.46E-02 |
| INIP     | 1969.00    | 0.44 | 0.17 | 4.46E-03 | 3.72E-02 |
| DPM2     | 2775.61    | 0.44 | 0.14 | 9.10E-04 | 1.22E-02 |
| LAMP5    | 1737.71    | 0.44 | 0.85 | 5.39E-03 | 4.22E-02 |
| GTF2H5   | 2809.82    | 0.44 | 0.08 | 6.72E-08 | 9.12E-06 |
| TIAL1    | 1754.81    | 0.44 | 0.21 | 1.27E-02 | 7.42E-02 |
| ACIN1    | 2743.63    | 0.44 | 0.08 | 1.97E-08 | 3.44E-06 |
| TTC9C    | 1179.18    | 0.44 | 0.14 | 5.56E-04 | 8.68E-03 |
| DYRK1B   | 1294.96    | 0.44 | 0.17 | 4.96E-03 | 3.98E-02 |
| ZNF480   | 1520.95    | 0.44 | 0.18 | 6.23E-03 | 4.65E-02 |
| RING1    | 1244.25    | 0.44 | 0.22 | 1.71E-02 | 9.14E-02 |
| ZCCHC9   | 1400.32    | 0.43 | 0.13 | 4.08E-04 | 7.03E-03 |
| SMIM18   | 11.25      | 0.43 | 0.80 | 1.17E-02 | 7.04E-02 |
| C18orf32 | 6307.23    | 0.43 | 0.15 | 1.39E-03 | 1.65E-02 |
| C10orf82 | 102.17     | 0.43 | 0.84 | 5.40E-03 | 4.23E-02 |
| ELP6     | 1437.80    | 0.43 | 0.20 | 1.19E-02 | 7.11E-02 |
| ZDHC16   | 2559.30    | 0.43 | 0.19 | 9.68E-03 | 6.25E-02 |
| APLP1    | 1426.56    | 0.43 | 0.73 | 1.91E-02 | 9.84E-02 |
| MAPK8    | 1461.60    | 0.43 | 0.17 | 4.94E-03 | 3.98E-02 |
| CCDC43   | 1761.96    | 0.43 | 0.20 | 1.27E-02 | 7.43E-02 |
| NDST3    | 24.58      | 0.43 | 0.81 | 7.27E-03 | 5.18E-02 |
| KLK11    | 67.15      | 0.43 | 0.77 | 1.29E-02 | 7.48E-02 |
| ZNF138   | 680.79     | 0.43 | 0.22 | 1.93E-02 | 9.90E-02 |
| SPOCD1   | 76.18      | 0.43 | 0.89 | 9.94E-04 | 1.31E-02 |
| TMEM126B | 3131.16    | 0.43 | 0.15 | 1.94E-03 | 2.09E-02 |
| DSG2     | 2251.22    | 0.43 | 0.94 | 8.47E-05 | 2.22E-03 |
| MRPL19   | 3286.13    | 0.43 | 0.13 | 3.52E-04 | 6.37E-03 |
| DENR     | 6466.10    | 0.43 | 0.14 | 9.87E-04 | 1.30E-02 |
| CENPW    | 1224.84    | 0.43 | 0.73 | 1.83E-02 | 9.58E-02 |
| NXPH4    | 158.53     | 0.43 | 0.89 | 9.91E-04 | 1.31E-02 |
| CASP2    | 1371.79    | 0.42 | 0.17 | 6.10E-03 | 4.58E-02 |
| ACTR8    | 1893.47    | 0.42 | 0.15 | 1.62E-03 | 1.84E-02 |
| TMEM258  | 4029.32    | 0.42 | 0.15 | 1.91E-03 | 2.07E-02 |
| WDPCP    | 1454.56    | 0.42 | 0.19 | 1.06E-02 | 6.58E-02 |
| SCG2     | 3064.12    | 0.42 | 0.94 | 1.70E-05 | 6.75E-04 |
| CARNMT1  | 1528.12    | 0.42 | 0.19 | 1.23E-02 | 7.27E-02 |
| RAB33A   | 145.95     | 0.42 | 0.73 | 1.62E-02 | 8.80E-02 |
| DEUP1    | 17.88      | 0.42 | 0.93 | 4.33E-05 | 1.36E-03 |
| ARHGAP8  | 82.25      | 0.42 | 0.77 | 9.99E-03 | 6.37E-02 |
| CHST6    | 396.47     | 0.42 | 0.85 | 1.59E-03 | 1.82E-02 |
| R3HDM1   | 1392.85    | 0.42 | 0.18 | 9.05E-03 | 5.97E-02 |
| SMYD3    | 1424.49    | 0.42 | 0.17 | 4.94E-03 | 3.98E-02 |
| POLQ     | 98.28      | 0.42 | 0.82 | 2.68E-03 | 2.62E-02 |
| ARF5     | 10209.80   | 0.41 | 0.14 | 1.02E-03 | 1.33E-02 |
| GSS      | 2762.72    | 0.41 | 0.15 | 3.23E-03 | 2.95E-02 |
| TIRAP    | 492.77     | 0.41 | 0.16 | 4.44E-03 | 3.70E-02 |
| ZNF766   | 1734.63    | 0.41 | 0.15 | 2.82E-03 | 2.69E-02 |
| RAD50    | 5210.32    | 0.41 | 0.14 | 1.64E-03 | 1.86E-02 |
| GAS2L3   | 336.53     | 0.41 | 0.72 | 1.41E-02 | 8.00E-02 |
| ZMYM2    | 3948.05    | 0.41 | 0.20 | 1.79E-02 | 9.43E-02 |
| NUPL2    | 1606.04    | 0.41 | 0.12 | 3.86E-04 | 6.77E-03 |
| HLTF     | 4399.98    | 0.41 | 0.20 | 1.75E-02 | 9.29E-02 |
| RWDD3    | 1354.04    | 0.41 | 0.19 | 1.40E-02 | 7.97E-02 |
| LEO1     | 2163.94    | 0.41 | 0.16 | 3.92E-03 | 3.40E-02 |
| C1orf174 | 2371.15    | 0.41 | 0.13 | 6.89E-04 | 1.01E-02 |
| MED19    | 1404.55    | 0.41 | 0.20 | 1.87E-02 | 9.71E-02 |
| PTPRN    | 70.33      | 0.41 | 0.81 | 1.37E-03 | 1.64E-02 |
| ADCK5    | 748.78     | 0.41 | 0.17 | 8.16E-03 | 5.60E-02 |
| MORF4L1  | 33867.10   | 0.41 | 0.15 | 3.58E-03 | 3.17E-02 |
| ELAC1    | 909.13     | 0.40 | 0.17 | 6.71E-03 | 4.89E-02 |
| ORC5     | 1317.52    | 0.40 | 0.09 | 4.08E-06 | 2.35E-04 |
| C9orf85  | 992.72     | 0.40 | 0.13 | 1.11E-03 | 1.42E-02 |
| ZNF146   | 5703.56    | 0.40 | 0.17 | 9.21E-03 | 6.04E-02 |
| CPSF2    | 3084.32    | 0.40 | 0.18 | 1.26E-02 | 7.36E-02 |
| ALG2     | 3859.20    | 0.40 | 0.19 | 1.41E-02 | 8.01E-02 |
| TMCO1    | 8813.33    | 0.40 | 0.14 | 2.85E-03 | 2.71E-02 |
| MRPL27   | 3350.33    | 0.40 | 0.19 | 1.62E-02 | 8.79E-02 |
| LAG3     | 691.71     | 0.40 | 0.75 | 4.94E-03 | 3.98E-02 |
| PUSL1    | 983.69     | 0.40 | 0.17 | 9.49E-03 | 6.15E-02 |
| YIPF3    | 10400.29   | 0.40 | 0.18 | 1.20E-02 | 7.15E-02 |
| SLC25A46 | 4005.78    | 0.39 | 0.10 | 7.34E-05 | 2.04E-03 |
| C12orf73 | 520.91     | 0.39 | 0.19 | 1.68E-02 | 9.01E-02 |
| SLC35E3  | 1839.36    | 0.39 | 0.17 | 1.01E-02 | 6.40E-02 |
| NSA2     | 1482.29    | 0.39 | 0.17 | 1.12E-02 | 6.82E-02 |

|          |           |      |      |          |          |
|----------|-----------|------|------|----------|----------|
| OST4     | 11688.54  | 0.39 | 0.16 | 6.62E-03 | 4.84E-02 |
| TADA1    | 1318.79   | 0.39 | 0.19 | 1.79E-02 | 9.42E-02 |
| STX18    | 2365.57   | 0.39 | 0.09 | 1.40E-05 | 5.82E-04 |
| EED      | 1572.45   | 0.39 | 0.18 | 1.50E-02 | 8.36E-02 |
| GTF2H3   | 1524.88   | 0.39 | 0.13 | 1.30E-03 | 1.58E-02 |
| DHX29    | 3415.04   | 0.39 | 0.17 | 1.00E-02 | 6.37E-02 |
| YEATS2   | 1551.82   | 0.39 | 0.18 | 1.46E-02 | 8.18E-02 |
| SMC6     | 2951.05   | 0.39 | 0.14 | 3.02E-03 | 2.82E-02 |
| CIR1     | 2795.53   | 0.38 | 0.15 | 6.00E-03 | 4.54E-02 |
| ANGPTL6  | 298.75    | 0.38 | 0.72 | 5.84E-03 | 4.45E-02 |
| SEZ6L2   | 1210.01   | 0.38 | 0.77 | 3.49E-04 | 6.36E-03 |
| ZCCHC12  | 154.40    | 0.38 | 0.71 | 6.90E-03 | 5.00E-02 |
| ZNF281   | 2407.22   | 0.38 | 0.16 | 8.97E-03 | 5.94E-02 |
| BICD1    | 1762.81   | 0.38 | 0.18 | 1.59E-02 | 8.68E-02 |
| HTR2B    | 799.54    | 0.38 | 0.71 | 6.61E-03 | 4.84E-02 |
| MPV17    | 4772.26   | 0.38 | 0.15 | 5.70E-03 | 4.37E-02 |
| ARMCX6   | 1180.18   | 0.38 | 0.15 | 4.54E-03 | 3.76E-02 |
| CNTN6    | 137.84    | 0.38 | 0.70 | 7.17E-03 | 5.13E-02 |
| DLG1     | 3881.33   | 0.38 | 0.18 | 1.84E-02 | 9.60E-02 |
| TIMM21   | 2515.57   | 0.38 | 0.11 | 1.60E-04 | 3.58E-03 |
| ASPN     | 65896.35  | 0.38 | 0.67 | 9.75E-03 | 6.28E-02 |
| PGGT1B   | 1774.42   | 0.38 | 0.13 | 1.59E-03 | 1.82E-02 |
| AASDHPPT | 4125.98   | 0.38 | 0.18 | 1.54E-02 | 8.50E-02 |
| GLS      | 8583.99   | 0.38 | 0.16 | 9.87E-03 | 6.33E-02 |
| PGAM1    | 21174.33  | 0.38 | 0.17 | 1.25E-02 | 7.35E-02 |
| APOPT1   | 2217.89   | 0.38 | 0.15 | 5.63E-03 | 4.33E-02 |
| RBM47    | 1285.46   | 0.38 | 0.74 | 6.11E-04 | 9.19E-03 |
| CLK2     | 1765.68   | 0.37 | 0.17 | 1.15E-02 | 6.94E-02 |
| COQ4     | 2462.56   | 0.37 | 0.12 | 9.57E-04 | 1.27E-02 |
| MED31    | 1338.44   | 0.37 | 0.18 | 1.83E-02 | 9.57E-02 |
| GOLGA7   | 9777.84   | 0.37 | 0.14 | 4.15E-03 | 3.52E-02 |
| COLGAL1  | 7694.60   | 0.37 | 0.15 | 7.58E-03 | 5.33E-02 |
| SPAG9    | 7502.61   | 0.37 | 0.16 | 1.22E-02 | 7.23E-02 |
| CLN5     | 5369.80   | 0.37 | 0.16 | 9.98E-03 | 6.37E-02 |
| RPAP2    | 3071.16   | 0.37 | 0.16 | 9.70E-03 | 6.25E-02 |
| CLSPN    | 154.64    | 0.37 | 0.64 | 1.70E-02 | 9.12E-02 |
| CHST1    | 392.84    | 0.37 | 0.65 | 1.44E-02 | 8.13E-02 |
| PSMA2    | 8262.01   | 0.37 | 0.16 | 9.85E-03 | 6.32E-02 |
| LAMTOR3  | 4345.93   | 0.37 | 0.13 | 2.50E-03 | 2.51E-02 |
| ANKRD26  | 1218.86   | 0.37 | 0.17 | 1.39E-02 | 7.92E-02 |
| LRFN1    | 144.56    | 0.37 | 0.67 | 6.90E-03 | 5.00E-02 |
| SLC30A9  | 7000.01   | 0.37 | 0.13 | 2.35E-03 | 2.39E-02 |
| CPXM1    | 61889.57  | 0.37 | 0.63 | 1.62E-02 | 8.82E-02 |
| ALDH7A1  | 4312.54   | 0.36 | 0.15 | 9.85E-03 | 6.32E-02 |
| UFC1     | 3598.45   | 0.36 | 0.16 | 1.19E-02 | 7.13E-02 |
| PPIH     | 920.78    | 0.36 | 0.15 | 9.40E-03 | 6.12E-02 |
| TIMM9    | 1518.84   | 0.36 | 0.16 | 1.07E-02 | 6.63E-02 |
| HIF1A    | 15094.08  | 0.36 | 0.17 | 1.74E-02 | 9.28E-02 |
| PIAS2    | 3120.96   | 0.36 | 0.15 | 1.00E-02 | 6.37E-02 |
| PANX2    | 33.43     | 0.36 | 0.72 | 1.55E-05 | 6.29E-04 |
| LYPD1    | 189.59    | 0.36 | 0.68 | 2.48E-03 | 2.50E-02 |
| HMCN1    | 14982.38  | 0.36 | 0.66 | 6.43E-03 | 4.75E-02 |
| TAF12    | 2494.26   | 0.35 | 0.13 | 3.04E-03 | 2.83E-02 |
| WISP3    | 124.71    | 0.35 | 0.63 | 1.45E-02 | 8.16E-02 |
| ERLIN2   | 960.31    | 0.35 | 0.12 | 1.39E-03 | 1.65E-02 |
| DNAAF2   | 1666.79   | 0.35 | 0.15 | 1.01E-02 | 6.41E-02 |
| POLR2G   | 5001.96   | 0.35 | 0.15 | 1.04E-02 | 6.53E-02 |
| AGPAT2   | 2948.52   | 0.35 | 0.13 | 3.03E-03 | 2.83E-02 |
| SUCLG1   | 5244.80   | 0.35 | 0.15 | 1.16E-02 | 7.01E-02 |
| ZNF354A  | 1104.97   | 0.35 | 0.12 | 2.14E-03 | 2.24E-02 |
| AIFM3    | 42.31     | 0.35 | 0.64 | 8.81E-03 | 5.87E-02 |
| PRR36    | 101.09    | 0.35 | 0.65 | 3.04E-03 | 2.83E-02 |
| KIAA1024 | 414.83    | 0.35 | 0.63 | 8.74E-03 | 5.84E-02 |
| PTPMT1   | 2837.30   | 0.35 | 0.15 | 1.08E-02 | 6.65E-02 |
| NFE2L3   | 852.13    | 0.34 | 0.65 | 2.09E-03 | 2.20E-02 |
| APOC1    | 1124.10   | 0.34 | 0.67 | 7.63E-04 | 1.08E-02 |
| ALG8     | 2753.25   | 0.34 | 0.15 | 1.18E-02 | 7.10E-02 |
| SEMA6B   | 430.06    | 0.34 | 0.61 | 1.70E-02 | 9.10E-02 |
| CWC15    | 3936.29   | 0.34 | 0.14 | 7.19E-03 | 5.15E-02 |
| SMARCAD1 | 2536.46   | 0.34 | 0.15 | 1.14E-02 | 6.92E-02 |
| EPYC     | 4137.16   | 0.34 | 0.69 | 5.26E-11 | 1.97E-08 |
| ZNF775   | 812.46    | 0.34 | 0.16 | 1.68E-02 | 9.04E-02 |
| MYO19    | 1575.79   | 0.34 | 0.15 | 1.48E-02 | 8.27E-02 |
| FAM173B  | 808.12    | 0.34 | 0.14 | 7.97E-03 | 5.51E-02 |
| MDF1     | 671.65    | 0.34 | 0.62 | 8.45E-03 | 5.71E-02 |
| EFNB3    | 669.79    | 0.34 | 0.66 | 1.90E-04 | 4.09E-03 |
| GFER     | 555.34    | 0.34 | 0.16 | 1.76E-02 | 9.35E-02 |
| EXOSC1   | 1435.39   | 0.34 | 0.16 | 1.81E-02 | 9.51E-02 |
| G2E3     | 1811.98   | 0.34 | 0.16 | 1.77E-02 | 9.35E-02 |
| SFRP4    | 132492.23 | 0.34 | 0.60 | 1.31E-02 | 7.58E-02 |
| CENPM    | 143.25    | 0.33 | 0.62 | 8.32E-03 | 5.65E-02 |
| NLGN4X   | 767.62    | 0.33 | 0.65 | 2.77E-04 | 5.37E-03 |
| FCHO1    | 224.31    | 0.33 | 0.64 | 1.04E-03 | 1.36E-02 |
| DNAJC22  | 354.29    | 0.33 | 0.65 | 8.77E-05 | 2.26E-03 |
| LSM8     | 1932.99   | 0.33 | 0.16 | 1.89E-02 | 9.75E-02 |
| DDOST    | 21348.98  | 0.33 | 0.15 | 1.64E-02 | 8.86E-02 |
| TNFSF11  | 226.48    | 0.33 | 0.64 | 7.11E-04 | 1.03E-02 |
| CLIC3    | 924.67    | 0.33 | 0.59 | 1.83E-02 | 9.55E-02 |
| SNUPN    | 2124.61   | 0.33 | 0.16 | 1.88E-02 | 9.73E-02 |
| SLC35F5  | 5718.54   | 0.33 | 0.14 | 1.25E-02 | 7.35E-02 |
| NOL8     | 2842.20   | 0.33 | 0.16 | 1.94E-02 | 9.93E-02 |
| AKR7A2   | 6344.17   | 0.33 | 0.14 | 1.11E-02 | 6.80E-02 |
| TTK      | 156.84    | 0.33 | 0.61 | 3.69E-03 | 3.25E-02 |
| DPH5     | 736.70    | 0.32 | 0.14 | 1.15E-02 | 6.94E-02 |
| APOE     | 53974.53  | 0.32 | 0.59 | 1.27E-02 | 7.42E-02 |
| WDR92    | 1072.03   | 0.32 | 0.14 | 1.27E-02 | 7.43E-02 |
| BFAR     | 2900.51   | 0.32 | 0.12 | 5.35E-03 | 4.21E-02 |
| SUMO1    | 9869.83   | 0.32 | 0.09 | 1.57E-04 | 3.53E-03 |
| TRMT61B  | 1319.99   | 0.32 | 0.13 | 1.02E-02 | 6.46E-02 |
| KRT80    | 51.42     | 0.32 | 0.62 | 1.28E-04 | 2.96E-03 |
| ARSE     | 318.53    | 0.32 | 0.59 | 1.01E-02 | 6.38E-02 |
| TACC3    | 439.66    | 0.32 | 0.58 | 1.15E-02 | 6.94E-02 |

|           |          |      |      |          |          |
|-----------|----------|------|------|----------|----------|
| SCT       | 4.96     | 0.32 | 0.61 | 4.65E-04 | 7.70E-03 |
| RNF128    | 106.17   | 0.32 | 0.61 | 3.02E-04 | 5.68E-03 |
| BIRC2     | 6909.52  | 0.32 | 0.13 | 1.20E-02 | 7.16E-02 |
| RUBCNL    | 204.75   | 0.31 | 0.60 | 2.46E-03 | 2.48E-02 |
| EEF1AKMT2 | 1784.24  | 0.31 | 0.14 | 1.50E-02 | 8.34E-02 |
| NKPD1     | 8.32     | 0.31 | 0.59 | 6.26E-03 | 4.67E-02 |
| HIGD1B    | 740.45   | 0.31 | 0.59 | 6.80E-03 | 4.94E-02 |
| TD02      | 2953.48  | 0.31 | 0.62 | 1.15E-05 | 5.00E-04 |
| ADGRF5    | 5610.68  | 0.31 | 0.56 | 1.91E-02 | 9.83E-02 |
| COL9A2    | 1610.75  | 0.31 | 0.57 | 1.28E-02 | 7.46E-02 |
| MOY10L1   | 102.58   | 0.31 | 0.58 | 1.05E-02 | 6.56E-02 |
| LRRCG6    | 19.47    | 0.31 | 0.57 | 1.55E-02 | 8.56E-02 |
| SPAG17    | 42.79    | 0.31 | 0.58 | 6.35E-03 | 4.71E-02 |
| TFCP2     | 1376.77  | 0.31 | 0.11 | 2.09E-03 | 2.20E-02 |
| USP34     | 3414.95  | 0.31 | 0.11 | 2.24E-03 | 2.31E-02 |
| FAM136A   | 2725.86  | 0.31 | 0.13 | 9.29E-03 | 6.07E-02 |
| GALNT14   | 708.18   | 0.31 | 0.59 | 1.32E-03 | 1.59E-02 |
| CPA4      | 472.50   | 0.31 | 0.59 | 1.08E-03 | 1.39E-02 |
| SPCS1     | 7968.06  | 0.31 | 0.13 | 1.25E-02 | 7.33E-02 |
| CPNE7     | 76.37    | 0.31 | 0.60 | 2.45E-04 | 4.92E-03 |
| TRAPPC5   | 3312.22  | 0.30 | 0.14 | 1.79E-02 | 9.44E-02 |
| BEAN1     | 339.23   | 0.30 | 0.57 | 9.96E-03 | 6.36E-02 |
| UFL1      | 4740.99  | 0.30 | 0.13 | 1.40E-02 | 7.95E-02 |
| TSPAN13   | 2564.38  | 0.30 | 0.57 | 8.27E-03 | 5.64E-02 |
| TMPRSS3   | 10.59    | 0.30 | 0.56 | 1.65E-02 | 8.91E-02 |
| TAF10     | 4043.67  | 0.30 | 0.11 | 5.46E-03 | 4.25E-02 |
| HOXA1     | 80.55    | 0.30 | 0.55 | 1.44E-02 | 8.12E-02 |
| GPR158    | 79.93    | 0.30 | 0.57 | 1.79E-03 | 1.97E-02 |
| TMEM147   | 6016.12  | 0.29 | 0.13 | 1.75E-02 | 9.29E-02 |
| SOX30     | 38.53    | 0.29 | 0.54 | 1.93E-02 | 9.92E-02 |
| FLRT3     | 450.56   | 0.29 | 0.54 | 1.58E-02 | 8.70E-02 |
| CDCP1     | 159.00   | 0.29 | 0.56 | 2.07E-03 | 2.19E-02 |
| NEBL      | 102.58   | 0.29 | 0.54 | 1.77E-02 | 9.38E-02 |
| TRIM14    | 603.69   | 0.29 | 0.54 | 1.19E-02 | 7.11E-02 |
| PTPN4     | 1357.09  | 0.29 | 0.12 | 1.35E-02 | 7.77E-02 |
| AGAP2     | 46.57    | 0.28 | 0.54 | 1.35E-02 | 7.76E-02 |
| CEP55     | 253.75   | 0.28 | 0.54 | 1.43E-02 | 8.08E-02 |
| GTSE1     | 175.68   | 0.28 | 0.54 | 1.15E-02 | 6.94E-02 |
| COL10A1   | 581.23   | 0.28 | 0.55 | 1.32E-03 | 1.59E-02 |
| SKA3      | 117.19   | 0.28 | 0.54 | 4.90E-03 | 3.96E-02 |
| TMEM163   | 74.17    | 0.28 | 0.53 | 9.81E-03 | 6.31E-02 |
| APLN      | 1004.81  | 0.28 | 0.53 | 1.23E-02 | 7.27E-02 |
| CLNS1A    | 3048.66  | 0.28 | 0.13 | 1.94E-02 | 9.94E-02 |
| ASPHD1    | 152.86   | 0.28 | 0.55 | 7.39E-04 | 1.06E-02 |
| RFLNA     | 798.90   | 0.27 | 0.53 | 9.11E-03 | 6.00E-02 |
| TESMIN    | 24.54    | 0.27 | 0.52 | 1.90E-02 | 9.81E-02 |
| UHRF1     | 501.21   | 0.27 | 0.52 | 1.69E-02 | 9.06E-02 |
| KRT18     | 3828.70  | 0.27 | 0.54 | 1.10E-03 | 1.41E-02 |
| KIAA1324L | 17670.34 | 0.27 | 0.53 | 3.71E-03 | 3.26E-02 |
| SNX10     | 4617.01  | 0.27 | 0.55 | 5.49E-06 | 2.89E-04 |
| DIRC1     | 35.76    | 0.27 | 0.53 | 1.60E-03 | 1.82E-02 |
| TSNAX     | 4278.23  | 0.27 | 0.12 | 1.51E-02 | 8.38E-02 |
| PLPPR3    | 18.18    | 0.26 | 0.52 | 8.83E-03 | 5.88E-02 |
| SIDT1     | 103.31   | 0.26 | 0.53 | 3.86E-04 | 6.77E-03 |
| PLAC1     | 39.33    | 0.26 | 0.53 | 1.03E-03 | 1.35E-02 |
| KIAA1211L | 371.86   | 0.26 | 0.51 | 1.32E-02 | 7.60E-02 |
| USP43     | 55.36    | 0.26 | 0.51 | 8.92E-03 | 5.92E-02 |
| MAGED4    | 787.97   | 0.26 | 0.51 | 1.65E-02 | 8.90E-02 |
| TMEM26    | 548.34   | 0.25 | 0.52 | 5.33E-04 | 8.41E-03 |
| PARN      | 3837.24  | 0.25 | 0.10 | 6.58E-03 | 4.83E-02 |
| RAB27B    | 327.03   | 0.25 | 0.51 | 2.10E-03 | 2.20E-02 |
| C10orf90  | 20.72    | 0.25 | 0.51 | 4.43E-03 | 3.70E-02 |
| P2RY6     | 178.10   | 0.25 | 0.52 | 1.36E-06 | 1.03E-04 |
| CD7       | 179.86   | 0.25 | 0.52 | 4.29E-05 | 1.36E-03 |
| IL19      | 27.64    | 0.25 | 0.52 | 3.99E-04 | 6.94E-03 |
| DSC2      | 1147.12  | 0.25 | 0.51 | 3.72E-04 | 6.62E-03 |
| PDRG1     | 1125.58  | 0.25 | 0.09 | 2.85E-03 | 2.71E-02 |
| EPHX3     | 109.06   | 0.25 | 0.50 | 1.65E-02 | 8.91E-02 |
| TMEM92    | 175.01   | 0.25 | 0.51 | 4.12E-03 | 3.51E-02 |
| GIP       | 42.74    | 0.25 | 0.52 | 3.35E-07 | 3.52E-05 |
| POU2F3    | 35.56    | 0.24 | 0.50 | 7.83E-03 | 5.45E-02 |
| FAM19A3   | 99.62    | 0.24 | 0.51 | 7.27E-04 | 1.05E-02 |
| VTN       | 1163.41  | 0.24 | 0.50 | 8.61E-03 | 5.79E-02 |
| MCHR1     | 99.97    | 0.24 | 0.51 | 1.80E-06 | 1.27E-04 |
| NRG1      | 358.67   | 0.24 | 0.51 | 4.80E-05 | 1.47E-03 |
| LRRC43    | 27.74    | 0.24 | 0.49 | 1.11E-02 | 6.77E-02 |
| HMMR      | 226.43   | 0.24 | 0.49 | 1.19E-02 | 7.11E-02 |
| M1AP      | 19.74    | 0.24 | 0.49 | 7.84E-03 | 5.45E-02 |
| RAC2      | 2348.63  | 0.24 | 0.50 | 4.53E-06 | 2.52E-04 |
| CLDN16    | 63.07    | 0.24 | 0.50 | 7.96E-04 | 1.11E-02 |
| TOX       | 189.98   | 0.23 | 0.50 | 1.35E-03 | 1.62E-02 |
| CALB2     | 424.49   | 0.23 | 0.50 | 9.27E-04 | 1.24E-02 |
| F2RL1     | 169.36   | 0.23 | 0.48 | 1.58E-02 | 8.66E-02 |
| TNIP3     | 15.01    | 0.23 | 0.49 | 3.39E-03 | 3.05E-02 |
| CAMK2N2   | 11.99    | 0.23 | 0.49 | 2.40E-03 | 2.44E-02 |
| INHA      | 20.06    | 0.23 | 0.48 | 1.21E-02 | 7.20E-02 |
| HRASLS    | 26.23    | 0.23 | 0.49 | 7.48E-03 | 5.28E-02 |
| HSD17B6   | 236.95   | 0.23 | 0.49 | 2.16E-03 | 2.25E-02 |
| AQP5      | 130.04   | 0.23 | 0.48 | 9.87E-03 | 6.33E-02 |
| CLDN1     | 9051.93  | 0.23 | 0.49 | 7.80E-04 | 1.10E-02 |
| GALNT13   | 3407.91  | 0.23 | 0.48 | 7.21E-03 | 5.15E-02 |
| C7orf57   | 12.27    | 0.23 | 0.48 | 4.61E-03 | 3.80E-02 |
| FXVD7     | 76.44    | 0.23 | 0.48 | 1.90E-02 | 9.81E-02 |
| NKX2-3    | 648.78   | 0.22 | 0.49 | 1.35E-05 | 5.69E-04 |
| EPCAM     | 9.70     | 0.22 | 0.48 | 9.12E-03 | 6.00E-02 |
| ELFN1     | 451.61   | 0.22 | 0.48 | 4.37E-04 | 7.36E-03 |
| PPP2R5C   | 6776.65  | 0.22 | 0.09 | 1.45E-02 | 8.15E-02 |
| SPATA8    | 8.31     | 0.22 | 0.48 | 4.59E-03 | 3.79E-02 |
| AIM2      | 29.34    | 0.22 | 0.48 | 3.14E-03 | 2.89E-02 |
| PRSS21    | 20.29    | 0.22 | 0.48 | 1.18E-04 | 2.80E-03 |
| CPLX1     | 125.04   | 0.22 | 0.47 | 7.11E-03 | 5.10E-02 |
| BDH1      | 247.98   | 0.22 | 0.47 | 9.21E-03 | 6.04E-02 |

|            |           |      |      |          |          |
|------------|-----------|------|------|----------|----------|
| MARCO      | 283.56    | 0.21 | 0.47 | 3.17E-03 | 2.91E-02 |
| LIX1       | 54.46     | 0.21 | 0.48 | 3.94E-06 | 2.31E-04 |
| OPN4       | 61.26     | 0.21 | 0.46 | 1.40E-02 | 7.98E-02 |
| REC8       | 1171.51   | 0.21 | 0.47 | 1.92E-03 | 2.08E-02 |
| IL1R2      | 233.32    | 0.20 | 0.47 | 1.35E-03 | 1.62E-02 |
| GRM3       | 42.61     | 0.20 | 0.47 | 1.19E-03 | 1.48E-02 |
| KLK14      | 78.98     | 0.20 | 0.46 | 1.23E-02 | 7.27E-02 |
| IGFL2      | 71.46     | 0.20 | 0.47 | 4.22E-05 | 1.35E-03 |
| GSTM1      | 1845.23   | 0.20 | 0.46 | 9.06E-04 | 1.22E-02 |
| WNK4       | 249.85    | 0.20 | 0.46 | 7.54E-03 | 5.32E-02 |
| HHIRL2     | 186.20    | 0.20 | 0.45 | 1.82E-02 | 9.54E-02 |
| HIST1H3C   | 3.42      | 0.20 | 0.45 | 1.50E-02 | 8.34E-02 |
| RAB4A      | 4440.65   | 0.20 | 0.08 | 9.04E-03 | 5.97E-02 |
| DSC3       | 728.72    | 0.20 | 0.46 | 3.72E-03 | 3.27E-02 |
| LRRN4      | 630.05    | 0.19 | 0.46 | 9.96E-05 | 2.51E-03 |
| NKX3-2     | 723.27    | 0.19 | 0.46 | 2.61E-03 | 2.58E-02 |
| SLC22A18AS | 46.17     | 0.19 | 0.45 | 1.61E-02 | 8.77E-02 |
| KRT39      | 16.62     | 0.19 | 0.45 | 7.29E-03 | 5.19E-02 |
| SPINT1     | 786.47    | 0.19 | 0.45 | 8.38E-04 | 1.15E-02 |
| MUC3A      | 81.65     | 0.19 | 0.45 | 3.21E-03 | 2.93E-02 |
| CALB1      | 279.69    | 0.19 | 0.45 | 6.58E-03 | 4.83E-02 |
| OTOF       | 38.70     | 0.18 | 0.45 | 2.69E-04 | 5.25E-03 |
| TAS2R10    | 6.23      | 0.18 | 0.44 | 5.19E-03 | 4.13E-02 |
| ALK        | 9.33      | 0.18 | 0.44 | 1.45E-02 | 8.17E-02 |
| ISL2       | 113.42    | 0.17 | 0.44 | 5.08E-04 | 8.12E-03 |
| DMKN       | 2351.18   | 0.17 | 0.44 | 8.66E-03 | 5.81E-02 |
| IL10       | 1028.03   | 0.17 | 0.44 | 2.14E-05 | 8.03E-04 |
| LMNTD2     | 71.77     | 0.17 | 0.44 | 4.10E-03 | 3.50E-02 |
| POSTN      | 163371.21 | 0.17 | 0.43 | 1.43E-02 | 8.09E-02 |
| CXADR      | 776.42    | 0.17 | 0.43 | 1.76E-02 | 9.33E-02 |
| LGALS12    | 142.07    | 0.16 | 0.43 | 2.48E-03 | 2.50E-02 |
| GJA9       | 10.30     | 0.16 | 0.44 | 3.16E-04 | 5.89E-03 |
| WFIKKN1    | 165.20    | 0.16 | 0.43 | 1.33E-02 | 7.64E-02 |
| ALOX15B    | 104.22    | 0.16 | 0.43 | 4.05E-04 | 6.99E-03 |
| CHRM2      | 347.62    | 0.16 | 0.43 | 1.01E-02 | 6.41E-02 |
| CXCL13     | 28.11     | 0.16 | 0.43 | 1.50E-05 | 6.09E-04 |
| TNNT1      | 65.22     | 0.16 | 0.43 | 5.94E-04 | 9.06E-03 |
| TCERG1L    | 53.34     | 0.16 | 0.43 | 2.47E-04 | 4.95E-03 |
| STXBP2     | 584.51    | 0.16 | 0.43 | 3.39E-04 | 6.20E-03 |
| FAM83H     | 42.77     | 0.16 | 0.43 | 1.43E-03 | 1.68E-02 |
| CA9        | 495.01    | 0.16 | 0.43 | 7.06E-05 | 1.99E-03 |
| KRT8       | 6689.99   | 0.16 | 0.43 | 7.00E-04 | 1.02E-02 |
| BRINP2     | 92.03     | 0.16 | 0.43 | 2.76E-06 | 1.74E-04 |
| KISS1R     | 3.69      | 0.15 | 0.43 | 4.91E-03 | 3.97E-02 |
| KLHL31     | 23.16     | 0.15 | 0.43 | 8.03E-03 | 5.54E-02 |
| F5         | 2504.15   | 0.15 | 0.43 | 1.36E-02 | 7.83E-02 |
| MYRF       | 1077.22   | 0.15 | 0.43 | 1.09E-03 | 1.40E-02 |
| ADAMTS19   | 253.38    | 0.15 | 0.42 | 1.86E-02 | 9.68E-02 |
| CCL22      | 288.80    | 0.15 | 0.43 | 1.15E-02 | 6.98E-02 |
| PORY10     | 57.45     | 0.15 | 0.42 | 1.06E-02 | 6.57E-02 |
| ILDR2      | 581.77    | 0.15 | 0.43 | 6.89E-03 | 4.88E-02 |
| IGFBP2     | 49074.57  | 0.15 | 0.42 | 7.37E-03 | 5.22E-02 |
| NOTUM      | 202.51    | 0.15 | 0.43 | 5.80E-04 | 8.94E-03 |
| PALM3      | 16.06     | 0.15 | 0.42 | 2.70E-03 | 2.63E-02 |
| EGFL6      | 8086.16   | 0.15 | 0.42 | 5.42E-03 | 4.24E-02 |
| CBLN2      | 90.00     | 0.14 | 0.42 | 8.81E-04 | 1.20E-02 |
| PRKCQ      | 100.08    | 0.14 | 0.42 | 7.15E-05 | 2.00E-03 |
| DSC1       | 17.64     | 0.14 | 0.42 | 2.06E-03 | 2.18E-02 |
| NEFL       | 590.08    | 0.14 | 0.42 | 9.50E-03 | 6.15E-02 |
| CCDC68     | 205.98    | 0.14 | 0.42 | 1.78E-02 | 9.40E-02 |
| NXP2       | 13.93     | 0.14 | 0.42 | 2.41E-04 | 4.85E-03 |
| TNN        | 1483.64   | 0.14 | 0.42 | 2.78E-03 | 2.67E-02 |
| USH2A      | 7.04      | 0.14 | 0.42 | 1.88E-02 | 9.73E-02 |
| TREM1      | 226.78    | 0.14 | 0.42 | 1.13E-03 | 1.43E-02 |
| WNT4       | 11124.99  | 0.13 | 0.42 | 1.54E-03 | 1.77E-02 |
| SLC46A2    | 77.18     | 0.13 | 0.42 | 2.13E-04 | 4.42E-03 |
| KLK7       | 161.96    | 0.13 | 0.41 | 1.64E-02 | 8.87E-02 |
| PCSK9      | 92.83     | 0.13 | 0.41 | 1.35E-02 | 7.76E-02 |
| BCL11B     | 48.55     | 0.13 | 0.41 | 1.91E-02 | 9.82E-02 |
| DRC1       | 16.85     | 0.13 | 0.41 | 1.07E-02 | 6.64E-02 |
| IL13RA2    | 409.20    | 0.12 | 0.41 | 2.24E-03 | 2.31E-02 |
| NR1I2      | 7.00      | 0.12 | 0.41 | 2.29E-03 | 2.35E-02 |
| KLK4       | 87.99     | 0.12 | 0.41 | 4.58E-03 | 3.79E-02 |
| RGPD4      | 11.01     | 0.12 | 0.41 | 1.94E-02 | 9.93E-02 |
| FASLG      | 46.91     | 0.12 | 0.41 | 1.43E-05 | 5.89E-04 |
| SP7        | 250.83    | 0.12 | 0.41 | 2.80E-03 | 2.68E-02 |
| NR1H4      | 45.13     | 0.12 | 0.41 | 8.65E-04 | 1.18E-02 |
| ATG9B      | 145.25    | 0.12 | 0.41 | 7.01E-03 | 5.04E-02 |
| ABCA12     | 8.72      | 0.11 | 0.41 | 7.08E-03 | 5.08E-02 |
| ARMC3      | 4.21      | 0.11 | 0.41 | 8.33E-03 | 5.65E-02 |
| FOLR3      | 77.23     | 0.11 | 0.41 | 8.12E-03 | 5.58E-02 |
| TFAP2C     | 188.50    | 0.11 | 0.41 | 5.09E-03 | 4.06E-02 |
| IL5        | 4.26      | 0.11 | 0.40 | 8.28E-03 | 5.64E-02 |
| CRB2       | 174.74    | 0.11 | 0.40 | 1.81E-02 | 9.51E-02 |
| TRIM71     | 109.98    | 0.11 | 0.40 | 2.69E-03 | 2.62E-02 |
| ASTL       | 8.55      | 0.11 | 0.40 | 2.07E-03 | 2.19E-02 |
| SOWAHD     | 13.49     | 0.10 | 0.40 | 3.82E-03 | 3.33E-02 |
| HIST1H2AJ  | 15.33     | 0.10 | 0.40 | 6.92E-04 | 1.02E-02 |
| GBX2       | 7.66      | 0.10 | 0.40 | 3.38E-03 | 3.04E-02 |
| CYP2J2     | 14.64     | 0.10 | 0.40 | 1.02E-02 | 6.45E-02 |
| CXCR3      | 92.82     | 0.10 | 0.40 | 3.17E-03 | 2.91E-02 |
| SLC9C2     | 11.11     | 0.10 | 0.40 | 1.78E-03 | 1.97E-02 |
| CFAP46     | 19.06     | 0.10 | 0.40 | 6.77E-03 | 4.93E-02 |
| SLC30A10   | 146.88    | 0.10 | 0.40 | 1.83E-03 | 2.01E-02 |
| HIST1H2AB  | 5.83      | 0.10 | 0.40 | 7.00E-03 | 5.04E-02 |
| GZMM       | 24.49     | 0.09 | 0.40 | 3.01E-04 | 5.67E-03 |
| CARD11     | 58.29     | 0.09 | 0.40 | 5.86E-04 | 9.00E-03 |
| SBK2       | 10.56     | 0.09 | 0.40 | 2.14E-03 | 2.23E-02 |
| RFPL1      | 10.13     | 0.09 | 0.40 | 2.52E-03 | 2.53E-02 |
| VNN1       | 693.50    | 0.09 | 0.40 | 4.38E-04 | 7.36E-03 |
| ST8SIA6    | 68.14     | 0.09 | 0.40 | 1.29E-02 | 7.50E-02 |
| INA        | 11.12     | 0.09 | 0.40 | 9.40E-03 | 6.12E-02 |

|           |           |       |      |          |          |
|-----------|-----------|-------|------|----------|----------|
| KIRREL2   | 158.08    | 0.09  | 0.40 | 7.48E-05 | 2.06E-03 |
| ADGRE1    | 31.95     | 0.09  | 0.40 | 3.03E-03 | 2.83E-02 |
| GRP       | 8.45      | 0.08  | 0.39 | 5.02E-03 | 4.02E-02 |
| EPGN      | 68.89     | 0.08  | 0.39 | 1.53E-02 | 8.48E-02 |
| RORC      | 68.25     | 0.08  | 0.39 | 2.23E-03 | 2.31E-02 |
| CD244     | 63.94     | 0.08  | 0.39 | 2.79E-03 | 2.68E-02 |
| CCR2      | 86.20     | 0.08  | 0.39 | 9.94E-03 | 6.36E-02 |
| ADGRF4    | 15.60     | 0.07  | 0.39 | 9.07E-03 | 5.99E-02 |
| KCNK4     | 22.52     | 0.07  | 0.39 | 1.71E-03 | 1.91E-02 |
| FRMPD4    | 7.66      | 0.07  | 0.39 | 1.23E-02 | 7.25E-02 |
| FAM216B   | 221.62    | 0.07  | 0.39 | 8.29E-03 | 5.64E-02 |
| OTOS      | 5.88      | 0.06  | 0.39 | 1.93E-02 | 9.90E-02 |
| SCEL      | 16.79     | 0.06  | 0.39 | 3.48E-03 | 3.10E-02 |
| CF1       | 11.73     | 0.06  | 0.39 | 6.89E-03 | 4.99E-02 |
| PRR9      | 8.25      | 0.06  | 0.39 | 1.69E-02 | 9.06E-02 |
| ASGR2     | 27.10     | 0.05  | 0.39 | 8.96E-03 | 5.94E-02 |
| XCR1      | 15.98     | 0.05  | 0.39 | 8.53E-03 | 5.76E-02 |
| HAPLN1    | 21.32     | 0.05  | 0.39 | 1.61E-02 | 8.77E-02 |
| TIMD4     | 25.31     | 0.05  | 0.39 | 1.47E-02 | 8.21E-02 |
| SPHAR     | 46.33     | 0.04  | 0.38 | 5.31E-03 | 4.19E-02 |
| TBC1D3C   | 45.51     | 0.03  | 0.38 | 6.39E-03 | 4.73E-02 |
| USH1G     | 33.12     | 0.03  | 0.38 | 1.18E-02 | 7.09E-02 |
| TOX3      | 8.26      | -0.10 | 0.40 | 9.36E-03 | 6.10E-02 |
| OPRK1     | 6.51      | -0.13 | 0.41 | 1.74E-02 | 9.28E-02 |
| SOST      | 21.35     | -0.14 | 0.42 | 1.89E-02 | 9.75E-02 |
| OCA2      | 89.09     | -0.16 | 0.43 | 1.38E-02 | 7.89E-02 |
| OSTN      | 86.89     | -0.16 | 0.43 | 1.32E-02 | 7.62E-02 |
| ALLC      | 3.88      | -0.17 | 0.44 | 9.73E-03 | 6.27E-02 |
| NUP85     | 2810.14   | -0.19 | 0.08 | 1.80E-02 | 9.45E-02 |
| NUPR2     | 16.49     | -0.19 | 0.45 | 1.75E-02 | 9.29E-02 |
| GRIK5     | 40.07     | -0.19 | 0.45 | 1.67E-02 | 8.98E-02 |
| SPRR2A    | 65.01     | -0.19 | 0.45 | 1.39E-02 | 7.94E-02 |
| SNTG2     | 17.99     | -0.19 | 0.46 | 5.09E-03 | 4.06E-02 |
| TP53TG3   | 8.76      | -0.20 | 0.46 | 8.07E-03 | 5.56E-02 |
| MRPS26    | 2889.57   | -0.21 | 0.09 | 1.44E-02 | 8.13E-02 |
| PCCD5     | 3821.12   | -0.21 | 0.08 | 6.10E-03 | 4.58E-02 |
| SLC8A2    | 16.90     | -0.21 | 0.47 | 1.38E-02 | 7.89E-02 |
| CIDEA     | 7.52      | -0.21 | 0.47 | 2.65E-03 | 2.61E-02 |
| CPNE6     | 49.09     | -0.22 | 0.48 | 1.32E-02 | 7.61E-02 |
| TRIM44    | 7792.27   | -0.22 | 0.10 | 1.61E-02 | 8.77E-02 |
| PTPN5     | 28.34     | -0.23 | 0.49 | 1.26E-02 | 7.39E-02 |
| FBN3      | 37.95     | -0.23 | 0.49 | 1.93E-02 | 9.90E-02 |
| ARFRP1    | 4613.46   | -0.24 | 0.10 | 9.04E-03 | 5.97E-02 |
| ARIH2     | 5572.97   | -0.24 | 0.11 | 1.55E-02 | 8.56E-02 |
| TRIM37    | 1992.03   | -0.25 | 0.08 | 1.53E-03 | 1.77E-02 |
| RRM2B     | 3173.43   | -0.25 | 0.11 | 1.62E-02 | 8.79E-02 |
| VIM       | 182513.46 | -0.26 | 0.09 | 2.68E-03 | 2.62E-02 |
| PRPH      | 1001.70   | -0.26 | 0.52 | 1.59E-02 | 8.70E-02 |
| ATG13     | 7065.31   | -0.26 | 0.11 | 1.21E-02 | 7.21E-02 |
| TARDBP    | 7968.88   | -0.26 | 0.11 | 1.29E-02 | 7.50E-02 |
| TCF15     | 258.53    | -0.26 | 0.52 | 1.85E-02 | 9.63E-02 |
| CDK9      | 3869.67   | -0.27 | 0.12 | 1.69E-02 | 9.06E-02 |
| TPCN2     | 1665.40   | -0.27 | 0.11 | 8.62E-03 | 5.79E-02 |
| SMU1      | 4806.36   | -0.28 | 0.08 | 5.04E-04 | 8.10E-03 |
| PSMD11    | 6915.11   | -0.28 | 0.08 | 5.92E-04 | 9.05E-03 |
| RRP1      | 2058.90   | -0.28 | 0.12 | 1.75E-02 | 9.29E-02 |
| EWSR1     | 18918.05  | -0.28 | 0.13 | 1.88E-02 | 9.74E-02 |
| CTNNA1    | 17566.62  | -0.29 | 0.07 | 6.01E-05 | 1.75E-03 |
| SLC35A1   | 3354.52   | -0.29 | 0.13 | 1.66E-02 | 8.92E-02 |
| CC2D1A    | 2514.50   | -0.29 | 0.11 | 8.58E-03 | 5.78E-02 |
| CDH4      | 81.33     | -0.29 | 0.55 | 1.47E-02 | 8.22E-02 |
| GPS1      | 6217.63   | -0.29 | 0.11 | 7.89E-03 | 5.47E-02 |
| SERINC3   | 22438.63  | -0.29 | 0.13 | 1.60E-02 | 8.74E-02 |
| TTC21B    | 1760.73   | -0.30 | 0.13 | 1.83E-02 | 9.56E-02 |
| ZFAND4    | 631.40    | -0.30 | 0.11 | 4.37E-03 | 3.66E-02 |
| DYNC1L1L2 | 9621.39   | -0.30 | 0.12 | 1.03E-02 | 6.50E-02 |
| CDK5RAP2  | 2736.63   | -0.30 | 0.10 | 2.54E-03 | 2.54E-02 |
| PRKAR2A   | 3429.04   | -0.30 | 0.13 | 1.17E-02 | 7.02E-02 |
| ZXDA      | 617.60    | -0.30 | 0.13 | 1.08E-02 | 6.65E-02 |
| WRNIP1    | 3441.93   | -0.30 | 0.14 | 1.80E-02 | 9.47E-02 |
| RBM4      | 7486.71   | -0.31 | 0.11 | 2.84E-03 | 2.71E-02 |
| CHM       | 2281.86   | -0.31 | 0.14 | 1.94E-02 | 9.93E-02 |
| GTF3C5    | 2983.67   | -0.31 | 0.12 | 6.51E-03 | 4.80E-02 |
| SF3B4     | 6129.19   | -0.31 | 0.14 | 1.58E-02 | 8.66E-02 |
| DCTN2     | 10199.55  | -0.31 | 0.11 | 1.92E-03 | 2.08E-02 |
| UIMC1     | 1384.69   | -0.32 | 0.15 | 1.91E-02 | 9.84E-02 |
| SEC22C    | 4969.84   | -0.32 | 0.14 | 1.82E-02 | 9.53E-02 |
| SEC24C    | 6239.98   | -0.32 | 0.14 | 1.52E-02 | 8.43E-02 |
| HUWE1     | 4469.42   | -0.32 | 0.12 | 5.30E-03 | 4.18E-02 |
| CYBSR1    | 3369.30   | -0.32 | 0.15 | 1.77E-02 | 9.35E-02 |
| TBX1      | 220.91    | -0.32 | 0.60 | 1.08E-02 | 6.67E-02 |
| SART3     | 2699.71   | -0.32 | 0.15 | 1.93E-02 | 9.90E-02 |
| NMT1      | 4229.67   | -0.32 | 0.14 | 1.07E-02 | 6.63E-02 |
| DNAJB12   | 5094.68   | -0.32 | 0.14 | 1.44E-02 | 8.14E-02 |
| TRIM28    | 7711.64   | -0.32 | 0.12 | 5.59E-03 | 4.32E-02 |
| PIGO      | 2167.72   | -0.33 | 0.13 | 7.64E-03 | 5.37E-02 |
| BRD7      | 3271.65   | -0.33 | 0.12 | 3.49E-03 | 3.11E-02 |
| DDC       | 4.39      | -0.33 | 0.61 | 1.57E-02 | 8.62E-02 |
| GIGYF2    | 3986.93   | -0.33 | 0.12 | 3.57E-03 | 3.17E-02 |
| ALKBH1    | 894.74    | -0.33 | 0.15 | 1.62E-02 | 8.82E-02 |
| YLPM1     | 4392.43   | -0.33 | 0.15 | 1.81E-02 | 9.51E-02 |
| TAF1C     | 2972.77   | -0.34 | 0.12 | 3.58E-03 | 3.17E-02 |
| CGGBP1    | 9314.36   | -0.34 | 0.14 | 1.06E-02 | 6.57E-02 |
| PSKH1     | 3367.14   | -0.34 | 0.16 | 1.86E-02 | 9.66E-02 |
| UBR3      | 3101.22   | -0.34 | 0.12 | 2.97E-03 | 2.79E-02 |
| KCNK5     | 195.18    | -0.34 | 0.63 | 1.39E-02 | 7.92E-02 |
| AQR       | 3222.03   | -0.34 | 0.13 | 5.43E-03 | 4.25E-02 |
| EIF4ENIF1 | 1825.45   | -0.34 | 0.11 | 9.67E-04 | 1.28E-02 |
| VPS72     | 3078.10   | -0.34 | 0.14 | 9.08E-03 | 5.99E-02 |
| PRKRA     | 5216.47   | -0.34 | 0.15 | 1.19E-02 | 7.11E-02 |
| AIP       | 3142.54   | -0.34 | 0.14 | 9.85E-03 | 6.32E-02 |
| TMUB2     | 4505.89   | -0.35 | 0.16 | 1.88E-02 | 9.72E-02 |

|           |          |       |      |          |          |
|-----------|----------|-------|------|----------|----------|
| MTRR      | 3114.18  | -0.35 | 0.15 | 1.43E-02 | 8.09E-02 |
| LEP       | 13.66    | -0.35 | 0.65 | 1.17E-02 | 7.04E-02 |
| NFRKB     | 2244.78  | -0.35 | 0.15 | 1.15E-02 | 6.94E-02 |
| HCRTR1    | 15.33    | -0.35 | 0.65 | 1.07E-02 | 6.64E-02 |
| RRP8      | 1470.02  | -0.35 | 0.13 | 3.88E-03 | 3.36E-02 |
| ARAF      | 5349.50  | -0.35 | 0.13 | 4.90E-03 | 3.96E-02 |
| NELFE     | 4943.02  | -0.35 | 0.10 | 1.80E-04 | 3.95E-03 |
| PCID2     | 3275.34  | -0.35 | 0.13 | 4.66E-03 | 3.83E-02 |
| PPP2R1A   | 19272.22 | -0.36 | 0.13 | 3.37E-03 | 3.04E-02 |
| TMEM259   | 12896.24 | -0.36 | 0.11 | 1.11E-03 | 1.42E-02 |
| SART1     | 4482.90  | -0.36 | 0.14 | 6.60E-03 | 4.84E-02 |
| TAF9B     | 3255.77  | -0.36 | 0.15 | 7.55E-03 | 5.32E-02 |
| CNST      | 3349.35  | -0.36 | 0.15 | 7.93E-03 | 5.49E-02 |
| MINK1     | 3545.58  | -0.36 | 0.16 | 1.54E-02 | 8.50E-02 |
| TOX4      | 4168.69  | -0.36 | 0.16 | 1.22E-02 | 7.23E-02 |
| ARMC2     | 469.28   | -0.36 | 0.16 | 1.15E-02 | 6.94E-02 |
| DOK7      | 27.74    | -0.36 | 0.67 | 1.49E-02 | 8.30E-02 |
| ATG4B     | 4217.38  | -0.37 | 0.11 | 7.04E-04 | 1.03E-02 |
| SHPK      | 1570.46  | -0.37 | 0.17 | 1.44E-02 | 8.13E-02 |
| GP2       | 1592.37  | -0.37 | 0.17 | 1.38E-02 | 7.90E-02 |
| DDX54     | 3198.30  | -0.37 | 0.13 | 2.85E-03 | 2.71E-02 |
| PEF1      | 5802.60  | -0.37 | 0.17 | 1.67E-02 | 8.97E-02 |
| PIGU      | 1819.06  | -0.38 | 0.16 | 1.13E-02 | 6.89E-02 |
| CLIP1     | 8792.12  | -0.38 | 0.17 | 1.50E-02 | 8.35E-02 |
| XPO7      | 2724.87  | -0.38 | 0.15 | 7.74E-03 | 5.41E-02 |
| TANGO6    | 1082.45  | -0.38 | 0.14 | 4.15E-03 | 3.52E-02 |
| KANK3     | 1773.21  | -0.38 | 0.68 | 1.85E-02 | 9.62E-02 |
| SAP30BP   | 4657.59  | -0.38 | 0.13 | 1.46E-03 | 1.71E-02 |
| MAPK1IP1L | 11131.87 | -0.38 | 0.14 | 3.11E-03 | 2.87E-02 |
| ANKRD11   | 7705.73  | -0.38 | 0.12 | 8.47E-04 | 1.16E-02 |
| PPP4R3A   | 6246.38  | -0.38 | 0.16 | 9.97E-03 | 6.36E-02 |
| DDX19A    | 3656.27  | -0.38 | 0.09 | 5.24E-06 | 2.80E-04 |
| ANKRD12   | 7007.13  | -0.38 | 0.16 | 8.73E-03 | 5.63E-02 |
| LVRN      | 632.50   | -0.38 | 0.70 | 1.62E-02 | 8.82E-02 |
| ARFGAP2   | 5292.73  | -0.38 | 0.12 | 7.53E-04 | 1.07E-02 |
| CBLN1     | 37.25    | -0.38 | 0.70 | 1.58E-02 | 8.67E-02 |
| MTR       | 3632.81  | -0.38 | 0.16 | 7.31E-03 | 5.19E-02 |
| PFAS      | 1593.24  | -0.39 | 0.19 | 1.93E-02 | 9.92E-02 |
| NFYB      | 3865.69  | -0.39 | 0.15 | 6.14E-03 | 4.61E-02 |
| USP10     | 5636.34  | -0.39 | 0.15 | 5.21E-03 | 4.14E-02 |
| NSFL1C    | 6022.20  | -0.39 | 0.11 | 2.06E-04 | 4.35E-03 |
| AAMP      | 7691.83  | -0.39 | 0.15 | 5.94E-03 | 4.50E-02 |
| ACADVL    | 34530.72 | -0.39 | 0.18 | 1.84E-02 | 9.62E-02 |
| MAU2      | 4059.61  | -0.39 | 0.14 | 2.94E-03 | 2.77E-02 |
| RALGAPB   | 3031.28  | -0.39 | 0.12 | 5.61E-04 | 8.73E-03 |
| PPP6C     | 4952.51  | -0.39 | 0.14 | 3.07E-03 | 2.86E-02 |
| PUM1      | 10822.72 | -0.39 | 0.15 | 4.83E-03 | 3.93E-02 |
| MFS10     | 6053.66  | -0.39 | 0.17 | 1.09E-02 | 6.73E-02 |
| POLR2E    | 11242.44 | -0.39 | 0.13 | 1.93E-03 | 2.08E-02 |
| TRMT12    | 588.39   | -0.39 | 0.15 | 5.32E-03 | 4.19E-02 |
| RAD54L2   | 2386.34  | -0.39 | 0.13 | 1.84E-03 | 2.01E-02 |
| TM7SF3    | 5103.75  | -0.39 | 0.16 | 7.24E-03 | 5.17E-02 |
| PPP5C     | 3451.41  | -0.39 | 0.13 | 1.62E-03 | 1.84E-02 |
| BORCS5    | 828.18   | -0.39 | 0.17 | 1.23E-02 | 7.25E-02 |
| HRAS      | 1457.67  | -0.39 | 0.19 | 1.71E-02 | 9.14E-02 |
| RNF41     | 2513.93  | -0.39 | 0.15 | 5.46E-03 | 4.25E-02 |
| MARK2     | 3189.36  | -0.40 | 0.18 | 1.38E-02 | 7.90E-02 |
| RRP15     | 1085.81  | -0.40 | 0.18 | 1.43E-02 | 8.08E-02 |
| USP19     | 4483.23  | -0.40 | 0.18 | 1.45E-02 | 8.14E-02 |
| CCT7      | 11204.65 | -0.40 | 0.15 | 3.82E-03 | 3.33E-02 |
| SNRPA     | 2170.61  | -0.40 | 0.19 | 1.67E-02 | 8.97E-02 |
| XRCC6     | 21447.58 | -0.40 | 0.08 | 8.63E-07 | 7.12E-05 |
| GEMIN5    | 1652.89  | -0.40 | 0.19 | 1.87E-02 | 9.68E-02 |
| KMT2D     | 1382.86  | -0.40 | 0.16 | 5.69E-03 | 4.37E-02 |
| KIF1BP    | 4641.35  | -0.40 | 0.17 | 9.81E-03 | 6.31E-02 |
| MED24     | 3561.24  | -0.40 | 0.15 | 3.87E-03 | 3.36E-02 |
| ELOC      | 4999.13  | -0.40 | 0.17 | 7.69E-03 | 5.39E-02 |
| NHLRC2    | 2817.87  | -0.40 | 0.18 | 1.32E-02 | 7.60E-02 |
| REPS1     | 2558.02  | -0.40 | 0.15 | 2.99E-03 | 2.80E-02 |
| LARP1B    | 1614.90  | -0.40 | 0.20 | 1.95E-02 | 9.97E-02 |
| WASHC2C   | 4858.37  | -0.41 | 0.15 | 4.18E-03 | 3.54E-02 |
| RBM7      | 5706.93  | -0.41 | 0.13 | 1.22E-03 | 1.51E-02 |
| ZNF777    | 1583.10  | -0.41 | 0.18 | 1.28E-02 | 7.47E-02 |
| ABCF1     | 3232.27  | -0.41 | 0.15 | 2.89E-03 | 2.73E-02 |
| SEHL      | 3119.38  | -0.41 | 0.16 | 4.50E-03 | 3.74E-02 |
| STRN4     | 6691.04  | -0.41 | 0.11 | 1.17E-04 | 2.79E-03 |
| CDC73     | 5310.78  | -0.41 | 0.16 | 6.02E-03 | 4.55E-02 |
| GET4      | 2486.98  | -0.41 | 0.20 | 1.91E-02 | 9.81E-02 |
| ZNF593    | 811.58   | -0.41 | 0.19 | 1.54E-02 | 8.50E-02 |
| CYP51A1   | 4430.83  | -0.41 | 0.19 | 1.63E-02 | 8.83E-02 |
| GTPBP6    | 3186.16  | -0.41 | 0.20 | 1.83E-02 | 9.56E-02 |
| CELF1     | 7017.86  | -0.41 | 0.13 | 4.87E-04 | 7.92E-03 |
| POC1B     | 1423.35  | -0.41 | 0.20 | 1.96E-02 | 9.99E-02 |
| ZBTB7A    | 6181.44  | -0.41 | 0.18 | 1.00E-02 | 6.38E-02 |
| UBE3B     | 3416.12  | -0.42 | 0.12 | 2.16E-04 | 4.45E-03 |
| MED30     | 1813.70  | -0.42 | 0.18 | 8.24E-03 | 5.64E-02 |
| ELMO2     | 5418.05  | -0.42 | 0.17 | 7.36E-03 | 5.21E-02 |
| RRP9      | 1024.91  | -0.42 | 0.19 | 1.23E-02 | 7.27E-02 |
| LRWD1     | 1230.50  | -0.42 | 0.16 | 3.57E-03 | 3.17E-02 |
| POU6F1    | 652.82   | -0.42 | 0.17 | 7.33E-03 | 5.20E-02 |
| ACAT1     | 7179.25  | -0.42 | 0.20 | 1.78E-02 | 9.42E-02 |
| TINF2     | 5386.53  | -0.42 | 0.12 | 1.81E-04 | 3.95E-03 |
| ASB6      | 2171.36  | -0.42 | 0.16 | 3.57E-03 | 3.17E-02 |
| ETFDH     | 2223.90  | -0.42 | 0.16 | 3.93E-03 | 3.40E-02 |
| EFCAB14   | 13611.98 | -0.42 | 0.15 | 1.98E-03 | 2.12E-02 |
| CUL1      | 5996.15  | -0.42 | 0.10 | 2.24E-05 | 8.25E-04 |
| PCIF1     | 5210.54  | -0.42 | 0.21 | 1.79E-02 | 9.43E-02 |
| PPP3CC    | 3037.85  | -0.43 | 0.21 | 1.94E-02 | 9.92E-02 |
| NELFCD    | 5256.22  | -0.43 | 0.19 | 1.09E-02 | 6.73E-02 |
| DIMT1     | 3300.33  | -0.43 | 0.18 | 9.44E-03 | 6.14E-02 |
| BAG1      | 4643.30  | -0.43 | 0.18 | 7.72E-03 | 5.40E-02 |
| TBRG1     | 3356.01  | -0.43 | 0.13 | 3.52E-04 | 6.37E-03 |



|           |          |       |      |          |          |
|-----------|----------|-------|------|----------|----------|
| DDX24     | 11739.94 | -0.43 | 0.15 | 2.56E-03 | 2.55E-02 |
| MRPL38    | 3865.26  | -0.43 | 0.13 | 5.08E-04 | 8.12E-03 |
| MED29     | 5845.41  | -0.43 | 0.14 | 1.05E-03 | 1.37E-02 |
| NR2C2AP   | 665.09   | -0.43 | 0.18 | 7.98E-03 | 5.51E-02 |
| ZNF76     | 2324.35  | -0.43 | 0.18 | 7.91E-03 | 5.48E-02 |
| ELOVL5    | 7036.39  | -0.43 | 0.15 | 1.50E-03 | 1.75E-02 |
| FAM120AOS | 5562.44  | -0.43 | 0.17 | 5.70E-03 | 4.37E-02 |
| CDIPT     | 9141.54  | -0.43 | 0.11 | 3.68E-05 | 1.21E-03 |
| DUSP22    | 3691.05  | -0.43 | 0.21 | 1.86E-02 | 9.67E-02 |
| RBBP7     | 10902.47 | -0.43 | 0.14 | 1.38E-03 | 1.65E-02 |
| POR       | 6563.42  | -0.43 | 0.17 | 5.53E-03 | 4.28E-02 |
| GPR108    | 5937.21  | -0.43 | 0.20 | 1.26E-02 | 7.39E-02 |
| SRRT      | 4628.06  | -0.43 | 0.16 | 2.96E-03 | 2.79E-02 |
| ANKHD1    | 8021.34  | -0.44 | 0.17 | 5.73E-03 | 4.38E-02 |
| AK9       | 450.42   | -0.44 | 0.16 | 2.62E-03 | 2.59E-02 |
| NAPA      | 8387.73  | -0.44 | 0.20 | 1.17E-02 | 7.05E-02 |
| PTEN      | 12355.39 | -0.44 | 0.19 | 8.10E-03 | 5.58E-02 |
| AKAP8     | 2735.19  | -0.44 | 0.16 | 2.94E-03 | 2.77E-02 |
| ZNF333    | 2124.46  | -0.44 | 0.19 | 9.99E-03 | 6.37E-02 |
| DNAJA3    | 3268.17  | -0.44 | 0.17 | 4.40E-03 | 3.68E-02 |
| SARS      | 9953.39  | -0.44 | 0.15 | 1.97E-03 | 2.11E-02 |
| B4GALT3   | 2635.21  | -0.44 | 0.21 | 1.42E-02 | 8.02E-02 |
| CTBP2     | 5416.24  | -0.44 | 0.22 | 1.84E-02 | 9.60E-02 |
| RRN3      | 3399.20  | -0.44 | 0.16 | 3.08E-03 | 2.86E-02 |
| FBXO33    | 2065.38  | -0.44 | 0.16 | 3.11E-03 | 2.87E-02 |
| MUS81     | 3101.17  | -0.44 | 0.22 | 1.90E-02 | 9.78E-02 |
| CPSF4     | 1356.70  | -0.44 | 0.21 | 1.63E-02 | 8.82E-02 |
| NAT10     | 2827.13  | -0.44 | 0.16 | 2.64E-03 | 2.60E-02 |
| SELENOO   | 1843.80  | -0.44 | 0.21 | 1.57E-02 | 8.63E-02 |
| CDC97     | 3187.18  | -0.45 | 0.20 | 1.24E-02 | 7.32E-02 |
| HMBOX1    | 3326.82  | -0.45 | 0.20 | 1.12E-02 | 6.81E-02 |
| TJAP1     | 1660.06  | -0.45 | 0.21 | 1.39E-02 | 7.92E-02 |
| SF3A1     | 6208.58  | -0.45 | 0.22 | 1.57E-02 | 8.63E-02 |
| LARP4     | 3090.83  | -0.45 | 0.22 | 1.61E-02 | 8.77E-02 |
| GPKOW     | 1746.81  | -0.45 | 0.17 | 3.05E-03 | 2.84E-02 |
| DHX8      | 2319.25  | -0.45 | 0.21 | 1.26E-02 | 7.40E-02 |
| TTBK2     | 1599.97  | -0.45 | 0.22 | 1.76E-02 | 9.33E-02 |
| TOPORS    | 4429.58  | -0.45 | 0.17 | 3.88E-03 | 3.36E-02 |
| PRPF3     | 2740.94  | -0.45 | 0.22 | 1.54E-02 | 8.51E-02 |
| APH1B     | 2486.55  | -0.45 | 0.17 | 4.14E-03 | 3.52E-02 |
| ETS2      | 9336.33  | -0.45 | 0.85 | 1.80E-02 | 9.48E-02 |
| ZNF335    | 1969.80  | -0.45 | 0.18 | 4.52E-03 | 3.75E-02 |
| UTP4      | 2878.05  | -0.45 | 0.16 | 2.09E-03 | 2.20E-02 |
| NELFA     | 2518.38  | -0.46 | 0.17 | 2.67E-03 | 2.62E-02 |
| MTMR3     | 3993.66  | -0.46 | 0.21 | 1.29E-02 | 7.48E-02 |
| ZBTB40    | 1621.95  | -0.46 | 0.18 | 5.51E-03 | 4.28E-02 |
| SDHA      | 10230.71 | -0.46 | 0.15 | 1.05E-03 | 1.37E-02 |
| GAK       | 4816.59  | -0.46 | 0.15 | 8.42E-04 | 1.16E-02 |
| ATF4      | 14677.23 | -0.46 | 0.20 | 7.91E-03 | 5.49E-02 |
| ACTR5     | 704.72   | -0.46 | 0.16 | 2.30E-03 | 2.36E-02 |
| GRAMP1    | 1434.37  | -0.46 | 0.23 | 1.75E-02 | 9.28E-02 |
| DHX15     | 8052.91  | -0.46 | 0.15 | 8.96E-04 | 1.22E-02 |
| PSMF1     | 9828.59  | -0.46 | 0.17 | 3.13E-03 | 2.89E-02 |
| COX20     | 3142.41  | -0.46 | 0.22 | 1.44E-02 | 8.13E-02 |
| BBX       | 6539.53  | -0.46 | 0.20 | 9.18E-03 | 6.03E-02 |
| VEZF1     | 5011.21  | -0.46 | 0.20 | 9.65E-03 | 6.23E-02 |
| SENP2     | 2113.87  | -0.46 | 0.11 | 1.69E-05 | 6.72E-04 |
| RBBP6     | 5479.12  | -0.46 | 0.22 | 1.36E-02 | 7.82E-02 |
| RAB11B    | 11143.21 | -0.46 | 0.19 | 6.04E-03 | 4.55E-02 |
| ECSIT     | 1799.94  | -0.46 | 0.16 | 1.47E-03 | 1.71E-02 |
| EXOC7     | 9075.19  | -0.46 | 0.21 | 1.03E-02 | 6.50E-02 |
| AATF      | 2709.70  | -0.46 | 0.16 | 2.10E-03 | 2.20E-02 |
| PIN1      | 4763.45  | -0.46 | 0.17 | 2.80E-03 | 2.68E-02 |
| RNF123    | 2332.45  | -0.46 | 0.10 | 2.79E-06 | 1.75E-04 |
| FBXO31    | 3299.79  | -0.46 | 0.22 | 1.33E-02 | 7.63E-02 |
| CYB5D2    | 2157.02  | -0.46 | 0.19 | 6.75E-03 | 4.91E-02 |
| HNRNPU    | 31294.23 | -0.46 | 0.18 | 4.93E-03 | 3.97E-02 |
| POLR3E    | 1433.77  | -0.46 | 0.17 | 3.17E-03 | 2.91E-02 |
| RBM42     | 7440.12  | -0.46 | 0.12 | 4.76E-05 | 1.47E-03 |
| IARS2     | 6573.44  | -0.46 | 0.17 | 3.16E-03 | 2.90E-02 |
| ZNF143    | 1595.51  | -0.47 | 0.16 | 1.68E-03 | 1.88E-02 |
| UBE3A     | 8138.23  | -0.47 | 0.15 | 1.18E-03 | 1.48E-02 |
| ATF7      | 5535.14  | -0.47 | 0.23 | 1.49E-02 | 8.33E-02 |
| PPA1      | 5150.44  | -0.47 | 0.22 | 1.40E-02 | 7.98E-02 |
| DHRS7     | 7295.12  | -0.47 | 0.20 | 7.41E-03 | 5.24E-02 |
| ULK2      | 3530.57  | -0.47 | 0.22 | 1.20E-02 | 7.16E-02 |
| SLC25A28  | 2009.85  | -0.47 | 0.20 | 7.87E-03 | 5.47E-02 |
| BRPF1     | 1626.64  | -0.47 | 0.17 | 2.74E-03 | 2.65E-02 |
| TRIM39    | 1167.46  | -0.47 | 0.20 | 7.64E-03 | 5.37E-02 |
| ERCC3     | 4245.97  | -0.47 | 0.11 | 1.78E-05 | 6.98E-04 |
| RNPS1     | 12341.14 | -0.47 | 0.15 | 1.05E-03 | 1.36E-02 |
| PRPF6     | 6788.78  | -0.47 | 0.15 | 9.62E-04 | 1.27E-02 |
| UCKL1     | 2658.30  | -0.47 | 0.16 | 1.35E-03 | 1.62E-02 |
| LINC7     | 5557.57  | -0.47 | 0.16 | 1.72E-03 | 1.91E-02 |
| EDC4      | 4481.67  | -0.47 | 0.14 | 3.84E-04 | 6.75E-03 |
| RRP1B     | 2811.86  | -0.47 | 0.16 | 1.30E-03 | 1.58E-02 |
| LRSAM1    | 1902.20  | -0.47 | 0.20 | 7.01E-03 | 5.04E-02 |
| ZNF524    | 1505.16  | -0.48 | 0.22 | 1.19E-02 | 7.13E-02 |
| ZNFX1     | 7525.04  | -0.48 | 0.13 | 8.60E-05 | 2.23E-03 |
| CLASP1    | 3757.20  | -0.48 | 0.23 | 1.38E-02 | 7.89E-02 |
| RANBP10   | 1937.32  | -0.48 | 0.14 | 2.78E-04 | 5.38E-03 |
| PA2G4     | 7321.07  | -0.48 | 0.21 | 8.85E-03 | 5.89E-02 |
| POLG      | 3867.24  | -0.48 | 0.20 | 6.13E-03 | 4.60E-02 |
| TGFBRAP1  | 2626.25  | -0.48 | 0.15 | 7.14E-04 | 1.04E-02 |
| NCOA6     | 3030.93  | -0.48 | 0.08 | 5.71E-09 | 1.23E-06 |
| HINT3     | 1875.24  | -0.48 | 0.17 | 1.54E-03 | 1.77E-02 |
| GORASP1   | 3938.76  | -0.48 | 0.07 | 1.29E-11 | 6.40E-09 |
| SIVA1     | 4963.05  | -0.48 | 0.19 | 3.50E-03 | 3.12E-02 |
| GPHN      | 1257.24  | -0.48 | 0.16 | 1.10E-03 | 1.41E-02 |
| BCAS3     | 2529.88  | -0.48 | 0.20 | 5.39E-03 | 4.22E-02 |
| ST3GAL3   | 1784.15  | -0.48 | 0.21 | 7.47E-03 | 5.27E-02 |
| TCTA      | 3537.71  | -0.48 | 0.25 | 1.83E-02 | 9.58E-02 |

|          |          |       |      |          |          |
|----------|----------|-------|------|----------|----------|
| PCGF5    | 4675.52  | -0.48 | 0.21 | 7.71E-03 | 5.39E-02 |
| MECP2    | 2582.73  | -0.49 | 0.22 | 9.47E-03 | 6.15E-02 |
| SF1      | 9709.96  | -0.49 | 0.20 | 6.21E-03 | 4.64E-02 |
| POLD2    | 4912.80  | -0.49 | 0.14 | 1.85E-04 | 4.02E-03 |
| NOC4L    | 1271.17  | -0.49 | 0.14 | 2.02E-04 | 4.29E-03 |
| TBC1D22B | 755.14   | -0.49 | 0.17 | 1.11E-03 | 1.42E-02 |
| STAT6    | 12664.38 | -0.49 | 0.24 | 1.27E-02 | 7.42E-02 |
| CASKIN2  | 1125.01  | -0.50 | 0.21 | 6.85E-03 | 4.97E-02 |
| ZNF131   | 2526.74  | -0.50 | 0.20 | 4.43E-03 | 3.70E-02 |
| HNRNPM   | 12896.11 | -0.50 | 0.13 | 7.43E-05 | 2.05E-03 |
| STARD7   | 11927.90 | -0.50 | 0.23 | 1.20E-02 | 7.14E-02 |
| RFAP1    | 1671.17  | -0.50 | 0.16 | 7.19E-04 | 1.04E-02 |
| RELA     | 6015.79  | -0.50 | 0.16 | 7.33E-04 | 1.05E-02 |
| LRRC57   | 1411.40  | -0.50 | 0.23 | 1.04E-02 | 6.53E-02 |
| CALCOCO2 | 10958.28 | -0.50 | 0.14 | 1.22E-04 | 2.88E-03 |
| PSIP1    | 7216.09  | -0.50 | 0.15 | 2.36E-04 | 4.76E-03 |
| ABHD14B  | 4273.98  | -0.50 | 0.15 | 3.33E-04 | 6.10E-03 |
| THTPA    | 1324.19  | -0.50 | 0.21 | 6.55E-03 | 4.82E-02 |
| SMG7     | 3999.68  | -0.50 | 0.23 | 1.06E-02 | 6.57E-02 |
| EIF1AX   | 6560.81  | -0.50 | 0.22 | 8.26E-03 | 5.64E-02 |
| SOGA1    | 2013.52  | -0.50 | 0.16 | 7.80E-04 | 1.10E-02 |
| NUP214   | 3388.95  | -0.50 | 0.15 | 2.56E-04 | 5.08E-03 |
| CCDC61   | 858.71   | -0.50 | 0.15 | 2.09E-04 | 4.38E-03 |
| ADD1     | 24907.05 | -0.50 | 0.26 | 1.72E-02 | 9.20E-02 |
| MAFG     | 3194.34  | -0.50 | 0.12 | 1.96E-05 | 7.56E-04 |
| BTG3     | 4172.80  | -0.50 | 0.23 | 9.12E-03 | 6.00E-02 |
| UBE2H    | 13834.34 | -0.51 | 0.19 | 3.08E-03 | 2.86E-02 |
| UBAP1    | 5799.37  | -0.51 | 0.20 | 3.95E-03 | 3.41E-02 |
| TCP1     | 11270.55 | -0.51 | 0.20 | 4.04E-03 | 3.47E-02 |
| MLYCD    | 1484.26  | -0.51 | 0.19 | 2.94E-03 | 2.77E-02 |
| INPP5J   | 174.78   | -0.51 | 1.00 | 1.81E-02 | 9.48E-02 |
| INPP5E   | 1776.34  | -0.51 | 0.14 | 1.32E-04 | 3.04E-03 |
| SDE2     | 2086.24  | -0.51 | 0.21 | 5.14E-03 | 4.09E-02 |
| NRF1     | 1069.92  | -0.51 | 0.13 | 3.19E-05 | 1.11E-03 |
| SRSF4    | 8274.28  | -0.51 | 0.15 | 2.51E-04 | 5.01E-03 |
| MFS14A   | 6208.39  | -0.51 | 0.18 | 1.67E-03 | 1.88E-02 |
| RAB21    | 5889.46  | -0.52 | 0.21 | 5.41E-03 | 4.24E-02 |
| ZNF410   | 4756.46  | -0.52 | 0.16 | 5.81E-04 | 8.94E-03 |
| SLC22A4  | 425.53   | -0.52 | 0.26 | 1.54E-02 | 8.50E-02 |
| ZXDB     | 1446.82  | -0.52 | 0.25 | 1.24E-02 | 7.32E-02 |
| WDFY3    | 2663.97  | -0.52 | 0.16 | 4.01E-04 | 6.96E-03 |
| GABPB2   | 991.26   | -0.52 | 0.19 | 2.15E-03 | 2.24E-02 |
| PUF60    | 10311.68 | -0.52 | 0.13 | 3.34E-05 | 1.12E-03 |
| ILKAP    | 2286.93  | -0.52 | 0.14 | 7.72E-05 | 2.10E-03 |
| HOMER1   | 541.51   | -0.52 | 0.21 | 4.73E-03 | 3.87E-02 |
| RXRA     | 3863.77  | -0.52 | 0.25 | 1.28E-02 | 7.45E-02 |
| SCAF4    | 3252.69  | -0.52 | 0.20 | 3.35E-03 | 3.03E-02 |
| FLVCR1   | 352.41   | -0.52 | 0.23 | 8.18E-03 | 5.61E-02 |
| PPP2CB   | 2318.53  | -0.52 | 0.28 | 1.85E-02 | 9.64E-02 |
| GRB10    | 3059.28  | -0.52 | 0.21 | 4.84E-03 | 3.93E-02 |
| TTC7B    | 2129.61  | -0.52 | 0.28 | 1.86E-02 | 9.68E-02 |
| CNPPD1   | 4865.80  | -0.52 | 0.14 | 8.43E-05 | 2.22E-03 |
| ROCK2    | 12055.01 | -0.52 | 0.19 | 1.70E-03 | 1.90E-02 |
| UBIAD1   | 1874.39  | -0.52 | 0.18 | 1.11E-03 | 1.42E-02 |
| CNBP     | 34476.24 | -0.52 | 0.16 | 2.72E-04 | 5.32E-03 |
| CSAD     | 942.36   | -0.52 | 0.23 | 8.29E-03 | 5.64E-02 |
| CES2     | 5288.01  | -0.52 | 0.19 | 1.93E-03 | 2.08E-02 |
| GNA12    | 9260.26  | -0.52 | 0.22 | 6.22E-03 | 4.65E-02 |
| HIF1AN   | 3211.96  | -0.53 | 0.20 | 2.73E-03 | 2.65E-02 |
| LDLRAD3  | 1912.65  | -0.53 | 0.28 | 1.88E-02 | 9.73E-02 |
| AHCTF1   | 3622.36  | -0.53 | 0.22 | 5.29E-03 | 4.18E-02 |
| TSSC4    | 3165.82  | -0.53 | 0.16 | 3.95E-04 | 6.88E-03 |
| USP42    | 1838.36  | -0.53 | 0.22 | 6.18E-03 | 4.63E-02 |
| SLC25A12 | 2320.55  | -0.53 | 0.10 | 1.08E-07 | 1.38E-05 |
| USP18    | 948.70   | -0.53 | 0.20 | 2.98E-03 | 2.79E-02 |
| CXXC1    | 3889.96  | -0.53 | 0.16 | 3.44E-04 | 6.28E-03 |
| BBS7     | 1992.05  | -0.53 | 0.19 | 1.92E-03 | 2.07E-02 |
| CYB5R3   | 50265.27 | -0.53 | 0.25 | 1.01E-02 | 6.41E-02 |
| TFEB     | 2126.82  | -0.53 | 0.18 | 1.23E-03 | 1.52E-02 |
| RHOQ     | 6422.14  | -0.53 | 0.25 | 1.09E-02 | 6.73E-02 |
| VPS4A    | 4105.08  | -0.53 | 0.10 | 8.44E-08 | 1.11E-05 |
| TAPT1    | 2490.90  | -0.54 | 0.18 | 9.51E-04 | 1.27E-02 |
| INTS1    | 5725.56  | -0.54 | 0.27 | 1.49E-02 | 8.32E-02 |
| SUPT6H   | 4357.88  | -0.54 | 0.15 | 1.50E-04 | 3.40E-03 |
| LYSMD4   | 752.88   | -0.54 | 0.28 | 1.72E-02 | 9.17E-02 |
| BCL2L1   | 2824.43  | -0.54 | 0.22 | 5.30E-03 | 4.18E-02 |
| FAM53C   | 5799.22  | -0.54 | 0.18 | 8.67E-04 | 1.18E-02 |
| TRMT2B   | 924.82   | -0.54 | 0.24 | 8.23E-03 | 5.63E-02 |
| NOLC1    | 6607.44  | -0.54 | 0.25 | 9.45E-03 | 6.14E-02 |
| STX16    | 5323.56  | -0.54 | 0.24 | 8.32E-03 | 5.65E-02 |
| DHX30    | 5825.12  | -0.54 | 0.11 | 3.19E-07 | 3.43E-05 |
| PITPNB   | 9872.05  | -0.54 | 0.16 | 3.04E-04 | 5.72E-03 |
| WDR45B   | 7648.04  | -0.55 | 0.13 | 1.10E-05 | 4.91E-04 |
| PAF1     | 4677.67  | -0.55 | 0.19 | 1.14E-03 | 1.43E-02 |
| UBE2B    | 4522.04  | -0.55 | 0.16 | 1.69E-04 | 3.72E-03 |
| DIXDC1   | 4925.38  | -0.55 | 0.30 | 1.87E-02 | 9.68E-02 |
| NATD1    | 1461.14  | -0.55 | 0.28 | 1.52E-02 | 8.41E-02 |
| C18orf25 | 2018.58  | -0.55 | 0.20 | 2.42E-03 | 2.45E-02 |
| TOLLIP   | 5441.61  | -0.55 | 0.17 | 3.86E-04 | 6.77E-03 |
| ING1     | 2352.99  | -0.55 | 0.30 | 1.94E-02 | 9.92E-02 |
| USP20    | 2302.82  | -0.55 | 0.25 | 9.04E-03 | 5.97E-02 |
| RPTOR    | 868.11   | -0.55 | 0.23 | 5.08E-03 | 4.06E-02 |
| IBAS7    | 687.15   | -0.55 | 0.17 | 2.94E-04 | 5.60E-03 |
| KAT6A    | 3149.50  | -0.55 | 0.21 | 2.70E-03 | 2.63E-02 |
| SOD1     | 11246.08 | -0.55 | 0.15 | 7.59E-05 | 2.09E-03 |
| DHX38    | 2791.58  | -0.55 | 0.14 | 1.98E-05 | 7.58E-04 |
| SLC27A5  | 317.03   | -0.56 | 0.25 | 8.30E-03 | 5.64E-02 |
| PLP2     | 5849.52  | -0.56 | 0.25 | 8.30E-03 | 5.64E-02 |
| ATL2     | 2750.49  | -0.56 | 0.21 | 2.86E-03 | 2.71E-02 |
| SLC38A2  | 40804.00 | -0.56 | 0.22 | 3.70E-03 | 3.25E-02 |
| PHC2     | 10808.91 | -0.56 | 0.30 | 1.58E-02 | 8.66E-02 |
| PCF11    | 2894.26  | -0.56 | 0.21 | 2.07E-03 | 2.19E-02 |

|          |          |       |      |          |          |
|----------|----------|-------|------|----------|----------|
| ZNF653   | 270.08   | -0.56 | 0.30 | 1.63E-02 | 8.84E-02 |
| LRRC47   | 4095.43  | -0.56 | 0.19 | 8.58E-04 | 1.18E-02 |
| SLC41A3  | 2617.80  | -0.56 | 0.20 | 1.96E-03 | 2.10E-02 |
| OSBPL1A  | 8399.93  | -0.56 | 0.23 | 4.87E-03 | 3.95E-02 |
| DXS1     | 1830.07  | -0.56 | 0.25 | 7.55E-03 | 5.32E-02 |
| LZTS2    | 9755.50  | -0.56 | 0.28 | 1.12E-02 | 6.85E-02 |
| BCR      | 2662.70  | -0.56 | 0.23 | 3.99E-03 | 3.44E-02 |
| KLC1     | 11872.27 | -0.56 | 0.13 | 4.02E-06 | 2.34E-04 |
| JOSD1    | 1291.92  | -0.56 | 0.22 | 3.54E-03 | 3.15E-02 |
| PHRF1    | 3119.55  | -0.56 | 0.19 | 1.10E-03 | 1.41E-02 |
| NUDC     | 8739.43  | -0.56 | 0.19 | 7.35E-04 | 1.05E-02 |
| LRRC75B  | 2189.12  | -0.56 | 0.31 | 1.80E-02 | 9.48E-02 |
| NFKBIB   | 888.76   | -0.57 | 0.23 | 4.48E-03 | 3.72E-02 |
| YY1AP1   | 4750.93  | -0.57 | 0.17 | 3.51E-04 | 6.37E-03 |
| PIK3C2A  | 3354.87  | -0.57 | 0.20 | 1.63E-03 | 1.85E-02 |
| BAZ2A    | 4763.72  | -0.57 | 0.20 | 1.32E-03 | 1.59E-02 |
| SSBP2    | 6409.44  | -0.57 | 0.31 | 1.77E-02 | 9.35E-02 |
| NFAT5    | 3765.22  | -0.57 | 0.20 | 1.19E-03 | 1.48E-02 |
| COQ8B    | 1763.43  | -0.57 | 0.24 | 5.01E-03 | 4.01E-02 |
| PRKAA2   | 253.93   | -0.57 | 1.21 | 1.85E-02 | 9.64E-02 |
| APLP2    | 40263.77 | -0.57 | 0.26 | 7.97E-03 | 5.51E-02 |
| AKAP8L   | 4986.54  | -0.57 | 0.26 | 8.28E-03 | 5.64E-02 |
| SNRNP200 | 8747.76  | -0.57 | 0.16 | 1.07E-04 | 2.65E-03 |
| PTPRK    | 4208.56  | -0.58 | 0.27 | 9.18E-03 | 6.03E-02 |
| NGRN     | 11789.97 | -0.58 | 0.21 | 1.75E-03 | 1.95E-02 |
| ELMSAN1  | 4761.43  | -0.58 | 0.29 | 1.21E-02 | 7.18E-02 |
| TICAM1   | 1460.42  | -0.58 | 0.30 | 1.42E-02 | 8.04E-02 |
| RBMXL1   | 1995.66  | -0.58 | 0.23 | 3.65E-03 | 3.22E-02 |
| COX17    | 1888.54  | -0.58 | 0.23 | 3.43E-03 | 3.07E-02 |
| ARL2     | 6479.00  | -0.58 | 0.14 | 1.07E-05 | 4.83E-04 |
| NOD1     | 1454.73  | -0.58 | 0.22 | 2.61E-03 | 2.58E-02 |
| FBXC42   | 3814.28  | -0.58 | 0.23 | 3.34E-03 | 3.02E-02 |
| FAM219B  | 4299.33  | -0.58 | 0.28 | 1.02E-02 | 6.44E-02 |
| VAV2     | 1959.81  | -0.58 | 0.15 | 4.16E-05 | 1.33E-03 |
| PANK4    | 2042.70  | -0.58 | 0.14 | 8.21E-06 | 3.98E-04 |
| MAP3K3   | 5988.61  | -0.58 | 0.14 | 1.41E-05 | 5.84E-04 |
| DHPS     | 2570.43  | -0.58 | 0.22 | 2.23E-03 | 2.31E-02 |
| BTNZ1A   | 2510.64  | -0.58 | 0.27 | 7.47E-03 | 5.27E-02 |
| TSR2     | 3107.80  | -0.58 | 0.21 | 1.58E-03 | 1.81E-02 |
| SP2      | 1185.21  | -0.59 | 0.23 | 2.87E-03 | 2.72E-02 |
| TMEM129  | 5460.09  | -0.59 | 0.23 | 3.24E-03 | 2.95E-02 |
| VSIR     | 16020.97 | -0.59 | 0.32 | 1.54E-02 | 8.50E-02 |
| AEN      | 1719.19  | -0.59 | 0.29 | 1.03E-02 | 6.48E-02 |
| SLC25A44 | 2358.08  | -0.59 | 0.16 | 5.01E-05 | 1.52E-03 |
| POLRMT   | 2861.87  | -0.59 | 0.13 | 1.93E-06 | 1.33E-04 |
| BARD1    | 705.02   | -0.59 | 0.26 | 6.53E-03 | 4.81E-02 |
| SMC1A    | 5630.24  | -0.59 | 0.20 | 1.11E-03 | 1.42E-02 |
| KAT7     | 4336.23  | -0.59 | 0.27 | 6.96E-03 | 5.03E-02 |
| DHX16    | 2835.04  | -0.59 | 0.19 | 4.61E-04 | 7.68E-03 |
| CDK2     | 1895.15  | -0.59 | 0.32 | 1.54E-02 | 8.52E-02 |
| TSNARE1  | 644.54   | -0.60 | 0.24 | 3.78E-03 | 3.31E-02 |
| RIMKLB   | 3092.26  | -0.60 | 0.33 | 1.71E-02 | 9.14E-02 |
| ADCY9    | 2818.54  | -0.60 | 0.27 | 7.69E-03 | 5.39E-02 |
| CEP68    | 4642.29  | -0.60 | 0.24 | 3.99E-03 | 3.44E-02 |
| CCNDBP1  | 6070.96  | -0.60 | 0.19 | 3.74E-04 | 6.63E-03 |
| MYLIP    | 5601.26  | -0.60 | 0.26 | 6.04E-03 | 4.55E-02 |
| ATG4D    | 971.64   | -0.60 | 0.28 | 8.72E-03 | 5.83E-02 |
| FAM199X  | 1771.08  | -0.60 | 0.26 | 5.59E-03 | 4.32E-02 |
| CLK3     | 3911.93  | -0.60 | 0.19 | 4.24E-04 | 7.22E-03 |
| TUSC1    | 4640.19  | -0.60 | 0.30 | 1.00E-02 | 6.38E-02 |
| TMEM120A | 3114.73  | -0.60 | 0.18 | 3.09E-04 | 5.80E-03 |
| CALCOCC1 | 11594.05 | -0.60 | 0.34 | 1.79E-02 | 9.42E-02 |
| OCRL     | 1689.03  | -0.60 | 0.29 | 9.03E-03 | 5.97E-02 |
| PPM1B    | 5586.11  | -0.60 | 0.20 | 5.99E-04 | 9.08E-03 |
| ANAPC16  | 7942.11  | -0.60 | 0.29 | 1.02E-02 | 6.43E-02 |
| SLC29A2  | 116.60   | -0.60 | 1.30 | 1.89E-02 | 9.75E-02 |
| CLCN6    | 1844.98  | -0.60 | 0.28 | 7.52E-03 | 5.31E-02 |
| FDFT1    | 5706.58  | -0.60 | 0.27 | 7.06E-03 | 5.07E-02 |
| EHD1     | 7447.44  | -0.61 | 0.26 | 5.57E-03 | 4.31E-02 |
| NCOA1    | 6792.27  | -0.61 | 0.22 | 1.39E-03 | 1.65E-02 |
| BCL2L13  | 4267.86  | -0.61 | 0.31 | 1.21E-02 | 7.20E-02 |
| INPP4A   | 2375.40  | -0.61 | 0.24 | 2.73E-03 | 2.64E-02 |
| TBL3     | 3368.02  | -0.61 | 0.17 | 1.15E-04 | 2.75E-03 |
| DNAJA1   | 17942.06 | -0.61 | 0.34 | 1.63E-02 | 8.82E-02 |
| SMAD7    | 2953.40  | -0.61 | 0.30 | 9.94E-03 | 6.36E-02 |
| RERE     | 3815.35  | -0.61 | 0.26 | 4.87E-03 | 3.95E-02 |
| SYPL1    | 12828.72 | -0.61 | 0.18 | 1.88E-04 | 4.07E-03 |
| YPEL2    | 4182.46  | -0.61 | 0.29 | 8.64E-03 | 5.80E-02 |
| SAFB     | 7708.00  | -0.61 | 0.18 | 1.58E-04 | 3.53E-03 |
| VPS13D   | 6245.45  | -0.61 | 0.26 | 5.02E-03 | 4.02E-02 |
| NRBP2    | 4148.70  | -0.61 | 0.26 | 4.48E-03 | 3.72E-02 |
| H3F3B    | 95184.70 | -0.61 | 0.15 | 2.06E-05 | 7.78E-04 |
| PLAGL2   | 1020.98  | -0.61 | 0.29 | 8.98E-03 | 5.95E-02 |
| NFE2L2   | 19157.30 | -0.61 | 0.24 | 2.99E-03 | 2.80E-02 |
| ZYX      | 27661.24 | -0.61 | 0.17 | 7.13E-05 | 2.00E-03 |
| INPP5K   | 3201.49  | -0.61 | 0.22 | 1.23E-03 | 1.52E-02 |
| UNC45A   | 7205.88  | -0.62 | 0.20 | 7.27E-04 | 1.05E-02 |
| TRMT6    | 848.97   | -0.62 | 0.22 | 1.59E-03 | 1.82E-02 |
| SELENOK  | 6244.30  | -0.62 | 0.33 | 1.40E-02 | 7.98E-02 |
| TAF3     | 2163.18  | -0.62 | 0.28 | 6.62E-03 | 4.84E-02 |
| PEX19    | 5589.73  | -0.62 | 0.26 | 4.28E-03 | 3.59E-02 |
| GAS8     | 1042.89  | -0.62 | 0.34 | 1.47E-02 | 8.25E-02 |
| HSP90AB1 | 42868.21 | -0.62 | 0.30 | 9.45E-03 | 6.14E-02 |
| KLHL42   | 2923.58  | -0.62 | 0.22 | 1.01E-03 | 1.32E-02 |
| ATG101   | 1679.66  | -0.63 | 0.28 | 5.75E-03 | 4.40E-02 |
| KIAA0232 | 2716.16  | -0.63 | 0.24 | 2.25E-03 | 2.32E-02 |
| LIN37    | 547.77   | -0.63 | 0.24 | 2.12E-03 | 2.22E-02 |
| EIF4H    | 23468.40 | -0.63 | 0.12 | 1.20E-07 | 1.49E-05 |
| ENGASE   | 2245.61  | -0.63 | 0.32 | 1.05E-02 | 6.56E-02 |
| TECR     | 6733.95  | -0.63 | 0.22 | 1.29E-03 | 1.57E-02 |
| ID1      | 4291.78  | -0.63 | 0.34 | 1.33E-02 | 7.64E-02 |
| GDI1     | 9401.54  | -0.63 | 0.21 | 5.95E-04 | 9.06E-03 |

|          |          |       |      |          |          |
|----------|----------|-------|------|----------|----------|
| NACC2    | 2239.10  | -0.63 | 0.27 | 4.88E-03 | 3.95E-02 |
| ZNF263   | 3221.34  | -0.63 | 0.25 | 3.12E-03 | 2.88E-02 |
| FAM47E   | 96.63    | -0.63 | 0.32 | 1.03E-02 | 6.50E-02 |
| FAHD2A   | 1348.04  | -0.63 | 0.23 | 1.45E-03 | 1.70E-02 |
| SHMT1    | 941.85   | -0.64 | 0.33 | 1.10E-02 | 6.76E-02 |
| TMEM135  | 2572.72  | -0.64 | 0.35 | 1.51E-02 | 8.37E-02 |
| ZFYVE21  | 8221.13  | -0.64 | 0.30 | 7.75E-03 | 5.41E-02 |
| KLF8     | 1338.39  | -0.64 | 0.37 | 1.74E-02 | 9.28E-02 |
| ZNF891   | 565.28   | -0.64 | 0.30 | 7.68E-03 | 5.38E-02 |
| SLCO3A1  | 5598.56  | -0.64 | 0.28 | 5.25E-03 | 4.16E-02 |
| WBP11    | 6266.19  | -0.64 | 0.16 | 2.15E-05 | 8.04E-04 |
| RALY     | 12931.47 | -0.64 | 0.21 | 5.42E-04 | 8.50E-03 |
| KIF13A   | 2542.30  | -0.64 | 0.37 | 1.64E-02 | 8.88E-02 |
| TNFSF10  | 3339.13  | -0.64 | 0.30 | 7.87E-03 | 5.47E-02 |
| IFFO2    | 261.27   | -0.64 | 0.36 | 1.48E-02 | 8.29E-02 |
| KLF13    | 2571.93  | -0.64 | 0.30 | 7.55E-03 | 5.32E-02 |
| PINK1    | 9556.06  | -0.64 | 0.23 | 1.17E-03 | 1.47E-02 |
| RANBP2   | 4722.33  | -0.64 | 0.21 | 4.93E-04 | 7.99E-03 |
| GMEB2    | 1463.68  | -0.64 | 0.33 | 1.14E-02 | 6.92E-02 |
| ANXA11   | 22371.25 | -0.64 | 0.15 | 3.87E-06 | 2.29E-04 |
| PRPF8    | 14120.97 | -0.65 | 0.19 | 1.64E-04 | 3.65E-03 |
| TMEM106C | 4526.09  | -0.65 | 0.31 | 7.78E-03 | 5.42E-02 |
| BRPF3    | 1919.79  | -0.65 | 0.32 | 9.29E-03 | 6.07E-02 |
| URGCP    | 2932.43  | -0.65 | 0.22 | 8.53E-04 | 1.17E-02 |
| DLC1     | 13455.28 | -0.65 | 0.33 | 1.05E-02 | 6.56E-02 |
| ANKRD46  | 1870.35  | -0.65 | 0.28 | 4.15E-03 | 3.52E-02 |
| DYRK3    | 1508.57  | -0.65 | 0.23 | 1.06E-03 | 1.37E-02 |
| NUDT7    | 631.87   | -0.65 | 0.32 | 9.36E-03 | 6.10E-02 |
| TUBB4B   | 13640.37 | -0.66 | 0.36 | 1.29E-02 | 7.50E-02 |
| RAVER2   | 940.52   | -0.66 | 0.39 | 1.74E-02 | 9.25E-02 |
| DNAJC18  | 1689.11  | -0.66 | 0.33 | 9.05E-03 | 5.97E-02 |
| PPT2     | 1697.75  | -0.66 | 0.30 | 6.04E-03 | 4.55E-02 |
| GPATCH4  | 1208.63  | -0.66 | 0.21 | 4.68E-04 | 7.73E-03 |
| GAMT     | 1896.46  | -0.66 | 0.32 | 7.92E-03 | 5.49E-02 |
| DAB2IP   | 833.45   | -0.66 | 0.33 | 9.70E-03 | 6.25E-02 |
| SGF29    | 1132.06  | -0.66 | 0.33 | 8.57E-03 | 5.77E-02 |
| SUDS3    | 3383.11  | -0.66 | 0.23 | 8.36E-04 | 1.15E-02 |
| MANSC1   | 1468.32  | -0.66 | 0.25 | 1.87E-03 | 2.04E-02 |
| CTTNBP2  | 704.36   | -0.66 | 0.36 | 1.29E-02 | 7.50E-02 |
| TRIM47   | 7749.91  | -0.66 | 0.24 | 1.39E-03 | 1.65E-02 |
| PIR      | 599.47   | -0.67 | 0.32 | 7.37E-03 | 5.22E-02 |
| CLDND1   | 9613.81  | -0.67 | 0.18 | 3.71E-05 | 1.21E-03 |
| CAMTA1   | 3432.57  | -0.67 | 0.33 | 9.49E-03 | 6.15E-02 |
| CABIN1   | 1425.93  | -0.67 | 0.28 | 4.12E-03 | 3.51E-02 |
| ENSA     | 6611.23  | -0.67 | 0.25 | 2.15E-03 | 2.24E-02 |
| PNMA1    | 8769.98  | -0.67 | 0.33 | 8.72E-03 | 5.83E-02 |
| CEP131   | 1382.48  | -0.67 | 0.38 | 1.46E-02 | 8.20E-02 |
| SRRM2    | 38102.79 | -0.67 | 0.25 | 1.24E-03 | 1.53E-02 |
| TA7F     | 10832.26 | -0.67 | 0.19 | 1.07E-04 | 2.64E-03 |
| HIPK1    | 2999.93  | -0.67 | 0.26 | 2.40E-03 | 2.43E-02 |
| TMBIM1   | 20155.60 | -0.67 | 0.26 | 1.87E-03 | 2.04E-02 |
| LCLAT1   | 2494.65  | -0.67 | 0.42 | 1.89E-02 | 9.76E-02 |
| MTMR12   | 1833.57  | -0.68 | 0.15 | 2.15E-06 | 1.43E-04 |
| ZBTB10   | 3185.17  | -0.68 | 0.31 | 5.78E-03 | 4.41E-02 |
| DDX27    | 3759.48  | -0.68 | 0.21 | 2.74E-04 | 5.33E-03 |
| HY1      | 1596.72  | -0.68 | 0.30 | 4.53E-03 | 3.76E-02 |
| GNB5     | 3150.32  | -0.68 | 0.30 | 4.25E-03 | 3.58E-02 |
| WBP4     | 1832.06  | -0.68 | 0.20 | 1.17E-04 | 2.80E-03 |
| EXTL3    | 2541.46  | -0.69 | 0.21 | 2.11E-04 | 4.40E-03 |
| GSTM2    | 3006.91  | -0.69 | 0.32 | 6.62E-03 | 4.84E-02 |
| FKBP4    | 4850.31  | -0.69 | 0.38 | 1.27E-02 | 7.42E-02 |
| RNF38    | 3280.53  | -0.69 | 0.27 | 2.43E-03 | 2.46E-02 |
| SMARCD3  | 4491.56  | -0.69 | 0.37 | 1.13E-02 | 6.89E-02 |
| NOC2L    | 4668.05  | -0.69 | 0.19 | 7.23E-05 | 2.02E-03 |
| DDX5     | 85900.34 | -0.69 | 0.18 | 3.21E-05 | 1.11E-03 |
| MAPKBP1  | 1154.45  | -0.69 | 0.33 | 7.02E-03 | 5.05E-02 |
| LRP10    | 20321.49 | -0.70 | 0.33 | 6.83E-03 | 4.96E-02 |
| EH2D     | 65644.28 | -0.70 | 0.26 | 1.84E-03 | 2.01E-02 |
| ACBD4    | 1394.97  | -0.70 | 0.31 | 4.81E-03 | 3.92E-02 |
| SRF      | 1461.86  | -0.70 | 0.18 | 2.24E-05 | 8.26E-04 |
| ECH1     | 13995.63 | -0.70 | 0.27 | 2.11E-03 | 2.21E-02 |
| MED14OS  | 136.21   | -0.70 | 0.31 | 4.89E-03 | 3.96E-02 |
| FKRP     | 1307.66  | -0.70 | 0.27 | 1.78E-03 | 1.97E-02 |
| EEF2K    | 3799.20  | -0.70 | 0.27 | 2.04E-03 | 2.16E-02 |
| GTPBP1   | 3164.66  | -0.70 | 0.16 | 3.50E-06 | 2.11E-04 |
| MAF1     | 11333.07 | -0.70 | 0.18 | 2.51E-05 | 9.14E-04 |
| SYNE1    | 9324.02  | -0.70 | 0.30 | 3.67E-03 | 3.23E-02 |
| BCL7B    | 3840.82  | -0.70 | 0.22 | 3.16E-04 | 5.89E-03 |
| LRRC14   | 2708.51  | -0.70 | 0.16 | 4.20E-06 | 2.41E-04 |
| KLC2     | 1906.27  | -0.70 | 0.34 | 7.33E-03 | 5.20E-02 |
| NHEJ1    | 1033.20  | -0.71 | 0.23 | 3.83E-04 | 6.74E-03 |
| C2CD2    | 2494.74  | -0.71 | 0.26 | 1.16E-03 | 1.45E-02 |
| SIRT1    | 3417.18  | -0.71 | 0.28 | 2.06E-03 | 2.19E-02 |
| GPRC5B   | 5482.81  | -0.71 | 0.46 | 1.82E-02 | 9.53E-02 |
| MAGI2    | 1790.85  | -0.71 | 0.47 | 1.93E-02 | 9.90E-02 |
| MAP1B    | 32707.54 | -0.71 | 0.39 | 1.10E-02 | 6.76E-02 |
| LRCH1    | 1824.45  | -0.71 | 0.30 | 3.23E-03 | 2.95E-02 |
| KYAT1    | 400.53   | -0.71 | 0.26 | 1.40E-03 | 1.66E-02 |
| PLCB1    | 2428.70  | -0.71 | 0.24 | 5.80E-04 | 8.94E-03 |
| TLCD2    | 434.74   | -0.71 | 0.32 | 4.61E-03 | 3.80E-02 |
| SLC25A23 | 4264.97  | -0.71 | 0.45 | 1.65E-02 | 8.90E-02 |
| DZANK1   | 191.04   | -0.72 | 0.30 | 3.23E-03 | 2.95E-02 |
| KLHL36   | 2623.45  | -0.72 | 0.27 | 1.65E-03 | 1.86E-02 |
| HNRNPH3  | 8465.15  | -0.72 | 0.15 | 3.65E-07 | 3.68E-05 |
| ALDH16A1 | 1827.73  | -0.72 | 0.33 | 5.18E-03 | 4.12E-02 |
| SMIM10   | 867.62   | -0.72 | 0.43 | 1.41E-02 | 7.98E-02 |
| PVR      | 1829.30  | -0.72 | 0.49 | 1.86E-02 | 9.66E-02 |
| MTRF1L   | 1494.78  | -0.73 | 0.23 | 2.94E-04 | 5.60E-03 |
| LYRM1    | 1977.99  | -0.73 | 0.18 | 1.12E-05 | 4.96E-04 |
| ILK      | 23913.66 | -0.73 | 0.25 | 6.74E-04 | 9.96E-03 |
| STK38L   | 4133.87  | -0.73 | 0.25 | 7.50E-04 | 1.07E-02 |
| RAF1     | 7856.79  | -0.73 | 0.13 | 6.24E-09 | 1.32E-06 |

|            |           |       |      |          |          |
|------------|-----------|-------|------|----------|----------|
| FUK        | 813.78    | -0.73 | 0.31 | 3.40E-03 | 3.06E-02 |
| FAM207A    | 532.01    | -0.73 | 0.37 | 8.48E-03 | 5.72E-02 |
| HABP4      | 3473.91   | -0.73 | 0.34 | 5.60E-03 | 4.32E-02 |
| FCHSD2     | 4653.73   | -0.73 | 0.45 | 1.50E-02 | 8.36E-02 |
| IGSF8      | 4095.77   | -0.73 | 0.31 | 3.17E-03 | 2.91E-02 |
| PPP1CB     | 20500.89  | -0.73 | 0.22 | 1.96E-04 | 4.20E-03 |
| UPF1       | 6006.68   | -0.73 | 0.19 | 3.24E-05 | 1.11E-03 |
| PRRT2      | 1743.99   | -0.73 | 0.45 | 1.55E-02 | 8.56E-02 |
| EHBP1      | 3891.21   | -0.73 | 0.42 | 1.22E-02 | 7.23E-02 |
| SAFB2      | 3846.86   | -0.74 | 0.27 | 1.30E-03 | 1.58E-02 |
| FAM131A    | 977.26    | -0.74 | 0.32 | 4.00E-03 | 3.44E-02 |
| BRD2       | 11831.26  | -0.74 | 0.35 | 5.53E-03 | 4.29E-02 |
| TMEM245    | 5846.24   | -0.74 | 0.29 | 2.00E-03 | 2.14E-02 |
| DCP1A      | 4272.93   | -0.74 | 0.19 | 2.53E-05 | 9.19E-04 |
| SCPEP1     | 12712.07  | -0.74 | 0.39 | 9.53E-03 | 6.17E-02 |
| KCTD10     | 8480.65   | -0.74 | 0.21 | 7.31E-05 | 2.03E-03 |
| RNF122     | 288.64    | -0.74 | 0.40 | 9.51E-03 | 6.16E-02 |
| PKIG       | 3557.60   | -0.74 | 0.42 | 1.13E-02 | 6.87E-02 |
| BCL7A      | 614.13    | -0.75 | 0.47 | 1.53E-02 | 8.47E-02 |
| DGKE       | 402.04    | -0.75 | 0.40 | 9.39E-03 | 6.11E-02 |
| LMTK2      | 1020.30   | -0.75 | 0.33 | 4.02E-03 | 3.45E-02 |
| STAT5B     | 6294.99   | -0.75 | 0.23 | 1.96E-04 | 4.21E-03 |
| CFL2       | 7548.36   | -0.75 | 0.20 | 3.28E-05 | 1.11E-03 |
| HIPK3      | 9764.72   | -0.75 | 0.26 | 8.59E-04 | 1.18E-02 |
| MFN2       | 4943.81   | -0.75 | 0.21 | 5.94E-05 | 1.73E-03 |
| RBM14      | 5461.34   | -0.75 | 0.09 | 1.25E-17 | 2.74E-14 |
| IGHMBP2    | 1509.99   | -0.76 | 0.33 | 3.44E-03 | 3.08E-02 |
| KLHDC4     | 652.45    | -0.76 | 0.19 | 1.99E-05 | 7.60E-04 |
| HERC3      | 2517.30   | -0.76 | 0.33 | 3.41E-03 | 3.06E-02 |
| CCDC9      | 1255.44   | -0.76 | 0.28 | 1.30E-03 | 1.58E-02 |
| MRPS6      | 4795.47   | -0.76 | 0.37 | 6.22E-03 | 4.65E-02 |
| CSNK1E     | 7677.01   | -0.77 | 0.23 | 1.37E-04 | 3.15E-03 |
| DUSP1      | 140575.22 | -0.77 | 0.53 | 1.50E-02 | 8.34E-02 |
| HDX        | 772.67    | -0.77 | 0.27 | 6.94E-04 | 1.02E-02 |
| PPARG      | 1361.10   | -0.77 | 0.52 | 1.72E-02 | 9.16E-02 |
| SORBS3     | 21676.48  | -0.77 | 0.37 | 6.05E-03 | 4.56E-02 |
| CDKN2D     | 820.99    | -0.77 | 0.42 | 9.55E-03 | 6.18E-02 |
| SLC44A2    | 12326.35  | -0.77 | 0.23 | 1.92E-04 | 4.13E-03 |
| IRF2BP2    | 8514.67   | -0.77 | 0.28 | 9.04E-04 | 1.22E-02 |
| SELENOW    | 18532.02  | -0.78 | 0.36 | 4.76E-03 | 3.89E-02 |
| ANKDD1A    | 811.51    | -0.78 | 0.26 | 5.75E-04 | 8.91E-03 |
| ST6GALNAC6 | 13688.15  | -0.78 | 0.33 | 3.24E-03 | 2.95E-02 |
| TCF7L1     | 2813.58   | -0.78 | 0.41 | 8.66E-03 | 5.81E-02 |
| SLC20A2    | 2495.85   | -0.78 | 0.26 | 4.78E-04 | 7.84E-03 |
| AKIRIN1    | 4838.91   | -0.78 | 0.19 | 9.65E-06 | 4.49E-04 |
| RMND5B     | 2882.43   | -0.78 | 0.24 | 2.52E-04 | 5.01E-03 |
| DHODH      | 644.64    | -0.78 | 0.35 | 4.04E-03 | 3.47E-02 |
| RAD23A     | 9132.57   | -0.78 | 0.19 | 4.64E-06 | 2.57E-04 |
| SLC5A3     | 2128.82   | -0.78 | 0.57 | 1.88E-02 | 9.73E-02 |
| SERGEF     | 1150.58   | -0.78 | 0.27 | 6.08E-04 | 9.16E-03 |
| TLE3       | 3172.43   | -0.78 | 0.49 | 1.38E-02 | 7.90E-02 |
| TMEM173    | 6723.23   | -0.79 | 0.20 | 1.13E-05 | 4.97E-04 |
| BEND3      | 253.86    | -0.79 | 0.39 | 6.67E-03 | 4.87E-02 |
| CAMK2N1    | 2594.38   | -0.79 | 0.42 | 8.87E-03 | 5.90E-02 |
| MACROD1    | 1362.55   | -0.79 | 0.22 | 8.30E-05 | 2.19E-03 |
| FYCO1      | 3764.72   | -0.80 | 0.46 | 1.13E-02 | 6.89E-02 |
| KIAA1958   | 328.26    | -0.80 | 0.47 | 1.15E-02 | 6.96E-02 |
| WDR74      | 1694.85   | -0.80 | 0.31 | 1.52E-03 | 1.76E-02 |
| TBC1D8     | 1169.83   | -0.80 | 0.39 | 5.58E-03 | 4.31E-02 |
| MAST4      | 3582.41   | -0.80 | 0.27 | 5.00E-04 | 8.07E-03 |
| GBA2       | 3900.63   | -0.80 | 0.26 | 3.54E-04 | 6.38E-03 |
| ANG        | 1714.81   | -0.80 | 0.48 | 1.22E-02 | 7.23E-02 |
| ZFP36L2    | 82189.00  | -0.80 | 0.38 | 5.20E-03 | 4.13E-02 |
| HOXA6      | 404.93    | -0.80 | 0.36 | 3.75E-03 | 3.29E-02 |
| PHF1       | 3806.79   | -0.80 | 0.37 | 4.68E-03 | 3.84E-02 |
| FAM107A    | 1017.78   | -0.80 | 2.37 | 1.65E-02 | 8.90E-02 |
| MAMLD1     | 687.55    | -0.81 | 0.46 | 1.07E-02 | 6.61E-02 |
| UBC        | 200791.70 | -0.81 | 0.17 | 9.03E-07 | 7.37E-05 |
| SPIDR      | 4964.44   | -0.81 | 0.22 | 4.77E-05 | 1.47E-03 |
| RUBCN      | 2547.46   | -0.81 | 0.30 | 1.21E-03 | 1.50E-02 |
| TNRC6C     | 1971.82   | -0.81 | 0.23 | 6.90E-05 | 1.96E-03 |
| HADH       | 3980.77   | -0.81 | 0.29 | 7.89E-04 | 1.10E-02 |
| EPM2A      | 718.07    | -0.82 | 0.43 | 7.70E-03 | 5.39E-02 |
| CLTGL1     | 630.19    | -0.82 | 0.36 | 3.73E-03 | 3.27E-02 |
| ACTA1      | 20.70     | -0.82 | 0.60 | 1.64E-02 | 8.85E-02 |
| POLE       | 1075.59   | -0.82 | 0.28 | 6.37E-04 | 9.51E-03 |
| ROCK1      | 11938.97  | -0.82 | 0.36 | 3.31E-03 | 3.00E-02 |
| KCNJ14     | 62.15     | -0.82 | 0.45 | 8.71E-03 | 5.83E-02 |
| SRSF3      | 24725.16  | -0.82 | 0.28 | 5.42E-04 | 8.50E-03 |
| TMEM47     | 12942.99  | -0.82 | 0.41 | 6.59E-03 | 4.83E-02 |
| JUP        | 4157.05   | -0.82 | 0.58 | 1.72E-02 | 9.16E-02 |
| DNAJB5     | 2205.64   | -0.82 | 0.29 | 7.54E-04 | 1.07E-02 |
| CYSTM1     | 6139.56   | -0.82 | 0.36 | 3.40E-03 | 3.06E-02 |
| C9orf3     | 4162.48   | -0.82 | 0.45 | 9.15E-03 | 6.01E-02 |
| PPP2R1B    | 2902.57   | -0.83 | 0.30 | 8.73E-04 | 1.19E-02 |
| TYSDN1     | 1245.94   | -0.83 | 0.27 | 4.03E-04 | 6.96E-03 |
| NDE1       | 3445.13   | -0.83 | 0.26 | 2.54E-04 | 5.04E-03 |
| RBM12      | 4499.01   | -0.83 | 0.22 | 2.67E-05 | 9.60E-04 |
| TNFRSF10D  | 1908.41   | -0.83 | 0.52 | 1.27E-02 | 7.40E-02 |
| DNAJB4     | 9785.26   | -0.84 | 0.26 | 2.65E-04 | 5.20E-03 |
| CASC3      | 8110.16   | -0.84 | 0.23 | 4.56E-05 | 1.42E-03 |
| SLC4A5     | 110.42    | -0.84 | 0.43 | 6.35E-03 | 4.71E-02 |
| STARD9     | 1625.18   | -0.84 | 0.24 | 1.04E-04 | 2.58E-03 |
| MTUS1      | 6070.42   | -0.84 | 0.48 | 9.95E-03 | 6.36E-02 |
| ASB13      | 2685.46   | -0.84 | 0.24 | 7.66E-05 | 2.09E-03 |
| TPCN1      | 8622.99   | -0.84 | 0.31 | 1.14E-03 | 1.43E-02 |
| SREBF2     | 4396.00   | -0.84 | 0.24 | 9.50E-05 | 2.41E-03 |
| BTBD3      | 2035.26   | -0.84 | 0.34 | 2.03E-03 | 2.16E-02 |
| PEAR1      | 4119.55   | -0.85 | 0.69 | 1.89E-02 | 9.78E-02 |
| KLFF       | 6072.63   | -0.85 | 0.24 | 5.83E-05 | 1.71E-03 |
| CTDSPL     | 3730.53   | -0.85 | 0.32 | 1.23E-03 | 1.52E-02 |
| SPEN       | 5944.09   | -0.85 | 0.31 | 9.58E-04 | 1.27E-02 |

|          |           |       |      |          |          |
|----------|-----------|-------|------|----------|----------|
| MYO1C    | 23671.11  | -0.85 | 0.21 | 1.21E-05 | 5.23E-04 |
| PLEKHG6  | 58.35     | -0.85 | 0.67 | 1.77E-02 | 9.36E-02 |
| LDOC1    | 5836.28   | -0.85 | 0.62 | 1.66E-02 | 8.94E-02 |
| FAHD2B   | 974.39    | -0.85 | 0.51 | 1.06E-02 | 6.59E-02 |
| BCL2L2   | 766.63    | -0.85 | 0.25 | 9.97E-05 | 2.51E-03 |
| VCL      | 29718.83  | -0.86 | 0.25 | 1.27E-04 | 2.95E-03 |
| DEPTOR   | 3624.18   | -0.86 | 0.36 | 2.28E-03 | 2.34E-02 |
| DUSP3    | 7001.45   | -0.86 | 0.30 | 7.32E-04 | 1.05E-02 |
| CCDC71L  | 2331.19   | -0.86 | 0.63 | 1.58E-02 | 8.66E-02 |
| SLC45A4  | 356.17    | -0.86 | 0.33 | 1.35E-03 | 1.62E-02 |
| BCOR     | 1412.00   | -0.86 | 0.30 | 6.04E-04 | 9.12E-03 |
| ZNF10    | 964.02    | -0.86 | 0.37 | 2.69E-03 | 2.62E-02 |
| TRIP10   | 7964.98   | -0.87 | 0.42 | 5.00E-03 | 4.01E-02 |
| NDRG2    | 11807.79  | -0.87 | 0.62 | 1.55E-02 | 8.54E-02 |
| KCNIP3   | 1593.50   | -0.87 | 0.61 | 1.47E-02 | 8.24E-02 |
| CRTC3    | 6196.81   | -0.87 | 0.34 | 1.40E-03 | 1.65E-02 |
| PANX1    | 2812.41   | -0.88 | 0.37 | 2.54E-03 | 2.54E-02 |
| MGP      | 172523.94 | -0.88 | 0.49 | 7.26E-03 | 5.18E-02 |
| IFRD1    | 7124.14   | -0.88 | 0.34 | 1.52E-03 | 1.76E-02 |
| PHF10    | 2997.27   | -0.88 | 0.31 | 5.99E-04 | 9.08E-03 |
| PPP2R5A  | 3035.19   | -0.88 | 0.29 | 3.54E-04 | 6.38E-03 |
| NDRG1    | 12156.76  | -0.88 | 0.38 | 2.55E-03 | 2.54E-02 |
| PACSIN2  | 5734.11   | -0.88 | 0.21 | 4.45E-06 | 2.51E-04 |
| ARHGEF17 | 7489.30   | -0.88 | 0.41 | 3.82E-03 | 3.33E-02 |
| PIP5KL1  | 132.18    | -0.88 | 0.51 | 8.77E-03 | 5.85E-02 |
| RELL1    | 1010.13   | -0.88 | 0.36 | 1.80E-03 | 1.98E-02 |
| FAM13A   | 4214.47   | -0.89 | 0.31 | 7.02E-04 | 1.02E-02 |
| TLN2     | 2204.15   | -0.89 | 0.31 | 5.79E-04 | 8.94E-03 |
| MINDY2   | 4163.52   | -0.89 | 0.20 | 2.44E-06 | 1.59E-04 |
| TNFSF12  | 4542.01   | -0.89 | 0.26 | 9.55E-05 | 2.42E-03 |
| MEHAS1   | 967.47    | -0.89 | 0.22 | 8.55E-06 | 4.09E-04 |
| MCL1     | 35066.62  | -0.89 | 0.26 | 9.02E-05 | 2.31E-03 |
| ATPBV0A1 | 4484.18   | -0.89 | 0.38 | 2.34E-03 | 2.39E-02 |
| ARPC1A   | 12823.56  | -0.90 | 0.35 | 1.37E-03 | 1.64E-02 |
| FST      | 1954.03   | -0.90 | 0.88 | 1.96E-02 | 9.99E-02 |
| UNC13B   | 1797.67   | -0.90 | 0.23 | 1.11E-05 | 4.93E-04 |
| PPRC1    | 3574.12   | -0.90 | 0.42 | 3.94E-03 | 3.41E-02 |
| CDADC1   | 1565.85   | -0.90 | 0.28 | 2.16E-04 | 4.45E-03 |
| C22orf39 | 2680.77   | -0.90 | 0.29 | 2.86E-04 | 5.46E-03 |
| NAP1L5   | 1518.64   | -0.90 | 0.52 | 8.69E-03 | 5.82E-02 |
| PKD2     | 5513.35   | -0.90 | 0.45 | 5.13E-03 | 4.09E-02 |
| DDX3X    | 33593.67  | -0.90 | 0.31 | 6.01E-04 | 9.08E-03 |
| PTCHD1   | 101.92    | -0.90 | 0.86 | 1.86E-02 | 9.66E-02 |
| TESK2    | 586.91    | -0.90 | 0.54 | 9.85E-03 | 6.32E-02 |
| GPER1    | 1581.81   | -0.90 | 0.39 | 2.56E-03 | 2.55E-02 |
| NR1H2    | 8700.87   | -0.91 | 0.20 | 6.70E-07 | 5.87E-05 |
| SERP2    | 400.08    | -0.91 | 0.43 | 4.13E-03 | 3.51E-02 |
| TNS2     | 16419.49  | -0.91 | 0.34 | 9.49E-04 | 1.27E-02 |
| TXLNG    | 1666.80   | -0.91 | 0.44 | 4.68E-03 | 3.84E-02 |
| ENDOD1   | 4593.08   | -0.91 | 0.33 | 7.80E-04 | 1.10E-02 |
| OVGP1    | 71.40     | -0.91 | 0.40 | 2.65E-03 | 2.61E-02 |
| C8orf86  | 29.35     | -0.92 | 0.82 | 1.71E-02 | 9.15E-02 |
| MTHFR    | 3191.46   | -0.92 | 0.29 | 2.02E-04 | 4.29E-03 |
| ISYNA1   | 8360.97   | -0.92 | 0.80 | 1.82E-02 | 9.53E-02 |
| GARNL3   | 1606.69   | -0.92 | 0.41 | 3.16E-03 | 2.90E-02 |
| COX7A1   | 2607.10   | -0.92 | 0.36 | 1.45E-03 | 1.70E-02 |
| KLHL21   | 6416.15   | -0.92 | 0.44 | 4.39E-03 | 3.67E-02 |
| SIX2     | 1700.65   | -0.92 | 0.55 | 9.20E-03 | 6.04E-02 |
| FAM122A  | 4158.39   | -0.92 | 0.30 | 3.25E-04 | 6.00E-03 |
| ALS2CL   | 1490.04   | -0.92 | 0.67 | 1.39E-02 | 7.92E-02 |
| MAML3    | 677.11    | -0.93 | 0.73 | 1.54E-02 | 8.51E-02 |
| ZSCAN18  | 6514.22   | -0.93 | 0.33 | 7.00E-04 | 1.02E-02 |
| TLN1     | 63434.59  | -0.93 | 0.26 | 5.74E-05 | 1.69E-03 |
| SH3RF3   | 1996.59   | -0.93 | 0.43 | 3.82E-03 | 3.33E-02 |
| ARHGAP17 | 7689.35   | -0.93 | 0.22 | 5.98E-06 | 3.08E-04 |
| LINGO1   | 2986.91   | -0.93 | 0.71 | 1.47E-02 | 8.23E-02 |
| MYH7B    | 128.03    | -0.93 | 0.53 | 7.80E-03 | 5.43E-02 |
| CAMK1    | 3381.75   | -0.94 | 0.26 | 4.99E-05 | 1.52E-03 |
| CCDC86   | 1948.06   | -0.94 | 0.24 | 1.41E-05 | 5.84E-04 |
| CYTH3    | 6826.01   | -0.94 | 0.32 | 5.59E-04 | 8.72E-03 |
| RPS8KA5  | 1367.03   | -0.94 | 0.24 | 1.58E-05 | 6.37E-04 |
| SPSB1    | 7466.79   | -0.94 | 0.69 | 1.38E-02 | 7.90E-02 |
| VAMP2    | 5217.63   | -0.94 | 0.41 | 2.77E-03 | 2.67E-02 |
| ELL      | 2551.36   | -0.94 | 0.32 | 4.82E-04 | 7.88E-03 |
| SLC41A1  | 2490.06   | -0.94 | 0.29 | 1.67E-04 | 3.70E-03 |
| FOXO3    | 17788.49  | -0.94 | 0.42 | 2.83E-03 | 2.70E-02 |
| EDA      | 371.27    | -0.94 | 0.60 | 1.05E-02 | 6.56E-02 |
| PPP1R12A | 15885.26  | -0.94 | 0.36 | 1.26E-03 | 1.54E-02 |
| SYNE3    | 1216.25   | -0.94 | 0.35 | 9.90E-04 | 1.31E-02 |
| MAP7D3   | 3714.23   | -0.94 | 0.42 | 2.76E-03 | 2.66E-02 |
| TTLL7    | 2364.52   | -0.94 | 0.59 | 9.97E-03 | 6.36E-02 |
| TPM1     | 34066.27  | -0.94 | 0.37 | 1.59E-03 | 1.82E-02 |
| ACACB    | 1659.66   | -0.95 | 0.38 | 1.70E-03 | 1.90E-02 |
| ACTG2    | 9848.81   | -0.95 | 1.19 | 1.93E-02 | 9.92E-02 |
| MOB3B    | 2130.28   | -0.95 | 0.77 | 1.57E-02 | 8.63E-02 |
| PTK2     | 12348.98  | -0.95 | 0.34 | 7.52E-04 | 1.07E-02 |
| GEM      | 12385.49  | -0.95 | 0.39 | 1.77E-03 | 1.96E-02 |
| OLFM1    | 1945.01   | -0.95 | 0.64 | 1.15E-02 | 6.94E-02 |
| MAPRE2   | 17894.73  | -0.96 | 0.53 | 7.43E-03 | 5.25E-02 |
| H2AFJ    | 4046.24   | -0.96 | 0.25 | 2.02E-05 | 7.72E-04 |
| MAP3K6   | 4252.16   | -0.96 | 0.29 | 1.24E-04 | 2.90E-03 |
| COL4A6   | 1134.84   | -0.96 | 2.80 | 1.53E-02 | 8.49E-02 |
| MPRIP    | 11825.63  | -0.96 | 0.38 | 1.47E-03 | 1.71E-02 |
| LG13     | 59.28     | -0.96 | 0.77 | 1.45E-02 | 8.15E-02 |
| SLC7A2   | 2598.63   | -0.96 | 0.99 | 1.81E-02 | 9.48E-02 |
| ARHGEF6  | 3692.22   | -0.96 | 0.34 | 6.66E-04 | 9.89E-03 |
| LRRC24   | 397.55    | -0.96 | 0.49 | 5.26E-03 | 4.17E-02 |
| DAAM2    | 4326.86   | -0.96 | 0.48 | 5.00E-03 | 4.01E-02 |
| FEM1C    | 3630.19   | -0.97 | 0.44 | 3.11E-03 | 2.87E-02 |
| MANEAL   | 160.25    | -0.97 | 0.86 | 1.61E-02 | 8.77E-02 |
| WDR1     | 20087.84  | -0.97 | 0.29 | 9.03E-05 | 2.31E-03 |
| IDS      | 14060.90  | -0.97 | 0.29 | 1.14E-04 | 2.74E-03 |

|           |           |       |      |          |          |
|-----------|-----------|-------|------|----------|----------|
| ZNRD1     | 2241.69   | -0.97 | 0.50 | 5.52E-03 | 4.29E-02 |
| ICAM1     | 17526.07  | -0.97 | 0.96 | 1.73E-02 | 9.23E-02 |
| NRARP     | 2228.35   | -0.97 | 1.05 | 1.77E-02 | 9.35E-02 |
| C1orf198  | 15141.89  | -0.97 | 0.47 | 4.20E-03 | 3.55E-02 |
| FILIP1    | 4175.68   | -0.98 | 0.21 | 4.76E-07 | 4.45E-05 |
| SLC8B1    | 5943.68   | -0.98 | 0.32 | 3.19E-04 | 5.92E-03 |
| RUSC2     | 6703.79   | -0.98 | 0.26 | 1.80E-05 | 7.04E-04 |
| PPP1R10   | 7841.31   | -0.98 | 0.27 | 4.68E-05 | 1.45E-03 |
| SLC48A1   | 2600.54   | -0.98 | 0.26 | 2.70E-05 | 9.65E-04 |
| CAMK2G    | 893.49    | -0.98 | 0.40 | 1.73E-03 | 1.93E-02 |
| ACTN4     | 5316.25   | -0.98 | 0.30 | 1.86E-04 | 3.68E-03 |
| JMJD6     | 2424.77   | -0.99 | 0.42 | 2.28E-03 | 2.34E-02 |
| DGKD      | 1864.44   | -0.99 | 0.33 | 3.23E-04 | 5.98E-03 |
| SMURF1    | 2209.96   | -0.99 | 0.19 | 2.49E-08 | 4.11E-06 |
| CDH13     | 5076.97   | -0.99 | 0.44 | 2.59E-03 | 2.57E-02 |
| ERF       | 983.86    | -0.99 | 0.41 | 1.67E-03 | 1.88E-02 |
| C12orf75  | 9906.53   | -0.99 | 0.60 | 8.20E-03 | 5.62E-02 |
| LGALS4    | 41.00     | -1.00 | 0.68 | 1.10E-02 | 6.75E-02 |
| FSTL3     | 6909.22   | -1.00 | 0.41 | 1.74E-03 | 1.93E-02 |
| SLC17A7   | 1076.00   | -1.00 | 0.89 | 1.56E-02 | 8.58E-02 |
| EPN2      | 4421.88   | -1.00 | 0.34 | 4.45E-04 | 7.46E-03 |
| SUN1      | 16532.16  | -1.00 | 0.29 | 7.65E-05 | 2.09E-03 |
| PER2      | 2434.70   | -1.00 | 0.36 | 6.19E-04 | 9.28E-03 |
| RRAS      | 11905.56  | -1.00 | 0.27 | 3.63E-05 | 1.19E-03 |
| MBOAT1    | 319.76    | -1.00 | 0.34 | 3.57E-04 | 6.42E-03 |
| SMTN      | 18594.57  | -1.00 | 0.44 | 2.49E-03 | 2.50E-02 |
| EPAS1     | 18893.34  | -1.00 | 0.70 | 1.20E-02 | 7.14E-02 |
| GABARAPL1 | 6435.89   | -1.00 | 0.22 | 4.68E-07 | 4.40E-05 |
| SIPA1L1   | 2278.84   | -1.00 | 0.48 | 3.92E-03 | 3.40E-02 |
| CCDC181   | 21.65     | -1.01 | 2.28 | 1.48E-02 | 8.26E-02 |
| DCAF4L1   | 11.27     | -1.01 | 1.64 | 1.81E-02 | 8.77E-02 |
| RAB6B     | 539.27    | -1.01 | 0.42 | 1.96E-03 | 2.11E-02 |
| CDS2      | 4473.30   | -1.01 | 0.49 | 4.20E-03 | 3.55E-02 |
| TSC22D2   | 9742.65   | -1.01 | 0.34 | 4.01E-04 | 6.96E-03 |
| LONRF1    | 4941.34   | -1.01 | 0.25 | 9.46E-06 | 4.44E-04 |
| LPP       | 17846.74  | -1.01 | 0.29 | 6.98E-05 | 1.97E-03 |
| SMYD4     | 2215.28   | -1.02 | 0.39 | 1.05E-03 | 1.36E-02 |
| TMEM109   | 17785.63  | -1.02 | 0.20 | 3.90E-08 | 5.93E-06 |
| PID1      | 4330.45   | -1.02 | 0.55 | 5.92E-03 | 4.49E-02 |
| CTC1      | 1071.22   | -1.02 | 0.30 | 8.20E-05 | 2.19E-03 |
| HAPLN3    | 2167.63   | -1.02 | 0.57 | 6.51E-03 | 4.80E-02 |
| CNNM2     | 1747.82   | -1.03 | 0.46 | 2.71E-03 | 2.63E-02 |
| EIF1B     | 5637.54   | -1.03 | 0.23 | 9.13E-07 | 7.41E-05 |
| LRP5      | 3679.87   | -1.03 | 0.51 | 4.41E-03 | 3.69E-02 |
| SBDS      | 13855.92  | -1.03 | 0.24 | 1.87E-06 | 1.29E-04 |
| TGFBR2    | 36003.97  | -1.03 | 0.44 | 2.17E-03 | 2.25E-02 |
| SLC7A9    | 13.64     | -1.04 | 0.61 | 6.89E-03 | 4.99E-02 |
| OSGIN1    | 634.55    | -1.04 | 0.39 | 8.99E-04 | 1.22E-02 |
| ZNF274    | 1491.71   | -1.04 | 0.38 | 7.39E-04 | 1.06E-02 |
| RNF150    | 1430.13   | -1.04 | 0.88 | 1.40E-02 | 7.97E-02 |
| ATP13A4   | 16.19     | -1.04 | 1.66 | 1.55E-02 | 8.55E-02 |
| SMIM1     | 37.94     | -1.04 | 0.72 | 1.04E-02 | 6.54E-02 |
| FOXO1     | 10337.54  | -1.05 | 0.42 | 1.53E-03 | 1.77E-02 |
| ATP6V0E2  | 1184.79   | -1.05 | 0.71 | 1.02E-02 | 6.44E-02 |
| FAAH      | 330.51    | -1.05 | 0.47 | 2.54E-03 | 2.54E-02 |
| PDE3A     | 4530.57   | -1.05 | 0.52 | 4.08E-03 | 3.49E-02 |
| PYGB      | 10097.29  | -1.05 | 0.37 | 5.25E-04 | 8.33E-03 |
| PLK3      | 3809.81   | -1.06 | 0.18 | 7.69E-10 | 2.00E-07 |
| LSMEM1    | 66.62     | -1.06 | 0.70 | 9.48E-03 | 6.15E-02 |
| TEAD3     | 2533.90   | -1.06 | 0.31 | 7.71E-05 | 2.10E-03 |
| COQ10B    | 6600.26   | -1.06 | 0.32 | 1.14E-04 | 2.73E-03 |
| TESK1     | 2270.35   | -1.06 | 0.23 | 3.25E-07 | 3.44E-05 |
| HSPB2     | 666.13    | -1.06 | 0.29 | 2.77E-05 | 9.83E-04 |
| UTRN      | 15224.52  | -1.07 | 0.44 | 1.76E-03 | 1.95E-02 |
| HSPA1A    | 152624.93 | -1.07 | 0.76 | 1.05E-02 | 6.56E-02 |
| FBXO32    | 7861.81   | -1.07 | 0.61 | 6.62E-03 | 4.84E-02 |
| MKNK2     | 5811.95   | -1.07 | 0.32 | 1.15E-04 | 2.76E-03 |
| ABR       | 5933.60   | -1.07 | 0.36 | 3.23E-04 | 5.98E-03 |
| SOC32     | 2692.82   | -1.07 | 0.59 | 5.89E-03 | 4.48E-02 |
| SLC6A9    | 2245.00   | -1.07 | 0.63 | 7.30E-03 | 5.19E-02 |
| BCL3      | 5525.69   | -1.07 | 0.37 | 4.75E-04 | 7.81E-03 |
| CCBE1     | 837.58    | -1.07 | 1.39 | 1.58E-02 | 8.66E-02 |
| ADCY6     | 4396.37   | -1.08 | 0.37 | 4.06E-04 | 7.01E-03 |
| ACSS1     | 2878.41   | -1.08 | 0.58 | 5.49E-03 | 4.27E-02 |
| STK24     | 8534.25   | -1.08 | 0.36 | 3.73E-04 | 6.63E-03 |
| ECHDC2    | 3848.98   | -1.08 | 0.52 | 3.49E-03 | 3.11E-02 |
| IRF2BPL   | 3361.66   | -1.08 | 0.34 | 2.05E-04 | 4.34E-03 |
| ARHGEF7   | 6397.62   | -1.08 | 0.45 | 1.85E-03 | 2.02E-02 |
| EZH1      | 3776.89   | -1.08 | 0.41 | 9.07E-04 | 1.22E-02 |
| SAMD4A    | 1451.16   | -1.08 | 0.47 | 2.27E-03 | 2.34E-02 |
| TACC2     | 3336.06   | -1.08 | 0.36 | 3.07E-04 | 5.76E-03 |
| WWP2      | 4980.80   | -1.08 | 0.40 | 7.96E-04 | 1.11E-02 |
| SRPK3     | 176.69    | -1.09 | 1.86 | 1.50E-02 | 8.34E-02 |
| RCL1      | 1514.76   | -1.09 | 0.28 | 1.25E-05 | 5.38E-04 |
| GZF1      | 1720.45   | -1.09 | 0.40 | 7.69E-04 | 1.08E-02 |
| ESRRG     | 51.99     | -1.09 | 1.24 | 1.50E-02 | 8.36E-02 |
| FLOT2     | 5259.51   | -1.09 | 0.26 | 4.23E-06 | 2.42E-04 |
| ZNF460    | 912.68    | -1.09 | 0.23 | 4.22E-07 | 4.15E-05 |
| MTURN     | 2704.41   | -1.10 | 0.53 | 3.68E-03 | 3.25E-02 |
| HSPB8     | 8253.74   | -1.10 | 0.57 | 4.78E-03 | 3.90E-02 |
| SPATA2L   | 953.41    | -1.10 | 0.27 | 5.73E-06 | 2.98E-04 |
| ALDH4A1   | 1343.92   | -1.10 | 0.48 | 2.21E-03 | 2.29E-02 |
| RG99      | 505.82    | -1.10 | 0.40 | 5.96E-04 | 9.06E-03 |
| C8orf88   | 864.54    | -1.10 | 0.40 | 6.01E-04 | 9.08E-03 |
| CFAP221   | 67.76     | -1.11 | 0.77 | 9.93E-03 | 6.36E-02 |
| STK40     | 5675.59   | -1.11 | 0.18 | 3.71E-11 | 1.62E-08 |
| SLC27A3   | 5879.51   | -1.11 | 0.28 | 9.63E-06 | 4.49E-04 |
| SV2C      | 26.37     | -1.11 | 2.09 | 1.43E-02 | 8.09E-02 |
| PPP1R15B  | 7841.00   | -1.11 | 0.31 | 4.41E-05 | 1.38E-03 |
| NFKBIA    | 54985.90  | -1.11 | 0.76 | 9.42E-03 | 6.13E-02 |
| SLC25A33  | 948.03    | -1.11 | 0.33 | 7.99E-05 | 2.15E-03 |
| EMP2      | 7755.74   | -1.12 | 0.20 | 1.19E-09 | 2.95E-07 |

|          |          |       |      |          |          |
|----------|----------|-------|------|----------|----------|
| EHP1L1   | 3317.99  | -1.12 | 0.40 | 5.10E-04 | 8.13E-03 |
| RAI2     | 3109.08  | -1.12 | 0.83 | 1.07E-02 | 6.63E-02 |
| PHF13    | 2246.76  | -1.13 | 0.47 | 1.65E-03 | 1.86E-02 |
| LRRCA8A  | 10134.12 | -1.13 | 0.16 | 4.65E-14 | 5.09E-11 |
| SOX15    | 272.48   | -1.13 | 1.53 | 1.46E-02 | 8.20E-02 |
| HOXA13   | 139.21   | -1.13 | 2.06 | 1.42E-02 | 8.04E-02 |
| STOM     | 31841.22 | -1.14 | 0.27 | 3.65E-06 | 2.18E-04 |
| VPS37B   | 2951.46  | -1.14 | 0.44 | 1.06E-03 | 1.37E-02 |
| PELI2    | 1828.29  | -1.14 | 0.49 | 1.91E-03 | 2.07E-02 |
| ARHGEF37 | 511.33   | -1.14 | 0.40 | 5.11E-04 | 8.13E-03 |
| PLXNB1   | 1922.14  | -1.14 | 0.46 | 1.29E-03 | 1.57E-02 |
| PRODH    | 56.01    | -1.14 | 0.75 | 8.29E-03 | 5.64E-02 |
| HS6ST1   | 4610.57  | -1.15 | 0.56 | 3.56E-03 | 3.17E-02 |
| NECAB1   | 1439.61  | -1.15 | 0.31 | 2.55E-05 | 9.20E-04 |
| PCDH1    | 4791.80  | -1.15 | 1.26 | 1.49E-02 | 8.31E-02 |
| UBA2     | 8865.65  | -1.15 | 0.33 | 6.72E-05 | 1.92E-03 |
| MTMR7    | 76.95    | -1.15 | 0.46 | 1.19E-03 | 1.48E-02 |
| PRDM11   | 728.59   | -1.15 | 0.23 | 1.14E-07 | 1.45E-05 |
| CPT1A    | 1896.73  | -1.15 | 0.33 | 5.64E-05 | 1.67E-03 |
| PNPLA2   | 5260.66  | -1.16 | 0.25 | 3.83E-07 | 3.84E-05 |
| PRKAG2   | 2277.72  | -1.16 | 0.56 | 3.26E-03 | 2.96E-02 |
| RRG      | 9645.10  | -1.16 | 0.47 | 1.23E-03 | 1.52E-02 |
| ZNF385C  | 60.80    | -1.16 | 0.60 | 4.11E-03 | 3.50E-02 |
| EXOC3L4  | 214.76   | -1.16 | 0.44 | 7.62E-04 | 1.08E-02 |
| ARID5B   | 18965.01 | -1.16 | 0.41 | 4.94E-04 | 8.01E-03 |
| B3GALNT2 | 1607.27  | -1.17 | 0.27 | 1.72E-06 | 1.23E-04 |
| FAM129A  | 13067.92 | -1.17 | 0.52 | 2.08E-03 | 2.19E-02 |
| MAN2A2   | 2672.15  | -1.17 | 0.28 | 4.50E-06 | 2.52E-04 |
| PLCE1    | 2327.53  | -1.17 | 0.53 | 2.49E-03 | 2.50E-02 |
| AMOTL2   | 12000.49 | -1.17 | 0.43 | 6.21E-04 | 9.30E-03 |
| EIF1     | 69322.48 | -1.17 | 0.20 | 2.56E-10 | 7.71E-08 |
| TNFAIP2  | 19769.01 | -1.17 | 0.54 | 2.65E-03 | 2.61E-02 |
| FANCE    | 345.32   | -1.17 | 0.35 | 8.29E-05 | 2.19E-03 |
| TMEM35A  | 463.30   | -1.17 | 0.97 | 1.17E-02 | 7.02E-02 |
| STXBP1   | 5150.53  | -1.18 | 0.26 | 5.23E-07 | 4.72E-05 |
| MAP3K7CL | 2482.28  | -1.18 | 0.87 | 1.01E-02 | 6.41E-02 |
| RDH5     | 730.07   | -1.18 | 0.36 | 1.05E-04 | 2.60E-03 |
| PANK1    | 608.16   | -1.18 | 0.69 | 6.21E-03 | 4.64E-02 |
| LGALS3   | 3838.25  | -1.18 | 0.35 | 6.59E-05 | 1.89E-03 |
| HSFX1    | 66.08    | -1.18 | 0.62 | 4.38E-03 | 3.67E-02 |
| ADH1B    | 18131.37 | -1.18 | 0.96 | 1.14E-02 | 6.91E-02 |
| ZEB1     | 7667.85  | -1.19 | 0.32 | 1.82E-05 | 7.06E-04 |
| ABCA3    | 1178.26  | -1.19 | 0.80 | 8.65E-03 | 5.81E-02 |
| ACYP1    | 591.11   | -1.19 | 0.33 | 3.33E-05 | 1.12E-03 |
| GADL1    | 51.76    | -1.19 | 0.38 | 1.68E-04 | 3.72E-03 |
| TSC22D3  | 64679.80 | -1.19 | 0.89 | 1.06E-02 | 6.59E-02 |
| ADGRB3   | 174.75   | -1.19 | 1.24 | 1.32E-02 | 7.61E-02 |
| OR51E1   | 1389.21  | -1.19 | 1.34 | 1.36E-02 | 7.81E-02 |
| RAMP1    | 1600.73  | -1.19 | 0.89 | 1.02E-02 | 6.44E-02 |
| GCNT4    | 95.43    | -1.19 | 0.94 | 1.06E-02 | 6.58E-02 |
| CRIP1    | 29142.65 | -1.20 | 0.39 | 2.28E-04 | 4.61E-03 |
| ADIPOO   | 39.65    | -1.20 | 1.14 | 1.21E-02 | 7.18E-02 |
| KIF1C    | 4591.13  | -1.20 | 0.31 | 1.00E-05 | 4.57E-04 |
| TPRG1    | 510.50   | -1.20 | 0.36 | 8.56E-05 | 2.22E-03 |
| FOSL2    | 25173.46 | -1.20 | 0.56 | 2.71E-03 | 2.63E-02 |
| JADE1    | 4714.54  | -1.21 | 0.46 | 8.46E-04 | 1.16E-02 |
| HDAC5    | 7025.70  | -1.21 | 0.40 | 2.14E-04 | 4.43E-03 |
| SLC38A1  | 4117.14  | -1.21 | 0.90 | 9.96E-03 | 6.36E-02 |
| ABCD2    | 288.76   | -1.21 | 0.72 | 6.16E-03 | 4.62E-02 |
| TNNI3K   | 97.19    | -1.22 | 0.57 | 2.72E-03 | 2.64E-02 |
| JUN      | 75011.85 | -1.22 | 0.39 | 1.52E-04 | 3.43E-03 |
| ADARB1   | 2090.09  | -1.22 | 0.56 | 2.58E-03 | 2.56E-02 |
| AFF3     | 1165.70  | -1.22 | 1.02 | 1.12E-02 | 6.86E-02 |
| FBLN5    | 33494.72 | -1.22 | 0.93 | 1.04E-02 | 6.54E-02 |
| C1orf167 | 268.32   | -1.22 | 0.58 | 2.89E-03 | 2.73E-02 |
| PROCR    | 12325.64 | -1.23 | 0.75 | 6.78E-03 | 4.93E-02 |
| LIMD1    | 1898.50  | -1.23 | 0.40 | 2.09E-04 | 4.38E-03 |
| HSPB1    | 54642.79 | -1.23 | 0.23 | 1.39E-08 | 2.50E-06 |
| PTCH1    | 522.45   | -1.23 | 0.54 | 1.89E-03 | 2.05E-02 |
| RIC3     | 184.22   | -1.23 | 0.80 | 7.66E-03 | 5.37E-02 |
| GLB1L2   | 89.31    | -1.24 | 0.72 | 5.66E-03 | 4.35E-02 |
| FRZB     | 8534.10  | -1.24 | 0.96 | 1.01E-02 | 6.40E-02 |
| HES1     | 4111.74  | -1.25 | 0.59 | 2.71E-03 | 2.63E-02 |
| C1QTNF1  | 13845.49 | -1.25 | 0.69 | 4.92E-03 | 3.97E-02 |
| OSBP2    | 211.80   | -1.25 | 0.66 | 4.27E-03 | 3.59E-02 |
| KLHL15   | 2410.42  | -1.25 | 0.28 | 1.24E-06 | 9.66E-05 |
| CCNI2    | 60.66    | -1.25 | 0.93 | 9.29E-03 | 6.07E-02 |
| CMTM5    | 67.52    | -1.25 | 1.18 | 1.17E-02 | 7.05E-02 |
| MYEF2    | 181.86   | -1.25 | 1.10 | 1.13E-02 | 6.89E-02 |
| TBC1D1   | 4772.53  | -1.26 | 0.43 | 3.14E-04 | 5.87E-03 |
| GPR88    | 93.19    | -1.26 | 0.39 | 1.29E-04 | 2.99E-03 |
| PPARGC1A | 333.10   | -1.26 | 0.61 | 3.07E-03 | 2.85E-02 |
| SOD3     | 20062.03 | -1.26 | 0.84 | 7.86E-03 | 5.46E-02 |
| SLMAP    | 7103.93  | -1.26 | 0.31 | 4.46E-06 | 2.51E-04 |
| RGN      | 779.81   | -1.26 | 0.74 | 5.91E-03 | 4.49E-02 |
| DBNDD2   | 7040.72  | -1.27 | 0.60 | 2.73E-03 | 2.64E-02 |
| ECE1     | 8761.78  | -1.27 | 0.39 | 1.13E-04 | 2.73E-03 |
| WDR17    | 172.87   | -1.27 | 0.50 | 9.50E-04 | 1.27E-02 |
| GNAL     | 1264.29  | -1.27 | 0.66 | 3.99E-03 | 3.44E-02 |
| MARK1    | 2206.03  | -1.27 | 0.41 | 1.88E-04 | 4.07E-03 |
| CAB39L   | 3670.69  | -1.27 | 0.64 | 3.49E-03 | 3.11E-02 |
| FKBP5    | 18591.08 | -1.27 | 1.03 | 1.04E-02 | 6.54E-02 |
| NXT1     | 2462.93  | -1.28 | 0.35 | 2.86E-05 | 1.01E-03 |
| GRHL1    | 420.00   | -1.28 | 0.90 | 8.41E-03 | 5.69E-02 |
| HRH2     | 1787.43  | -1.28 | 2.25 | 1.29E-02 | 7.50E-02 |
| MAP2     | 2172.41  | -1.29 | 1.10 | 1.10E-02 | 6.75E-02 |
| CTH      | 640.99   | -1.29 | 0.60 | 2.52E-03 | 2.52E-02 |
| CHD1     | 5115.74  | -1.29 | 0.40 | 1.13E-04 | 2.73E-03 |
| GRK5     | 1911.89  | -1.29 | 0.24 | 1.28E-08 | 2.37E-06 |
| PXDC1    | 8090.84  | -1.29 | 0.45 | 3.74E-04 | 6.63E-03 |
| SYNE2    | 8365.78  | -1.29 | 0.53 | 1.26E-03 | 1.54E-02 |
| ABTB1    | 5464.94  | -1.29 | 0.56 | 1.67E-03 | 1.88E-02 |



|           |           |       |      |          |          |
|-----------|-----------|-------|------|----------|----------|
| INMT      | 3129.75   | -1.29 | 0.63 | 3.09E-03 | 2.86E-02 |
| TEX29     | 10.76     | -1.30 | 1.97 | 1.21E-02 | 7.20E-02 |
| PDE1B     | 2446.26   | -1.30 | 0.66 | 3.77E-03 | 3.30E-02 |
| RGMA      | 1748.61   | -1.30 | 0.73 | 5.10E-03 | 4.06E-02 |
| FOLH1     | 418.97    | -1.30 | 0.64 | 3.23E-03 | 2.95E-02 |
| CNNM3     | 2679.90   | -1.30 | 0.40 | 1.12E-04 | 2.72E-03 |
| TP53111   | 13323.02  | -1.30 | 0.29 | 1.07E-06 | 8.50E-05 |
| CELA2A    | 8.52      | -1.30 | 1.13 | 9.95E-03 | 6.36E-02 |
| NAF1      | 695.21    | -1.30 | 0.41 | 1.43E-04 | 3.26E-03 |
| SYN2      | 32.32     | -1.30 | 0.79 | 6.08E-03 | 4.57E-02 |
| TSC22D1   | 51547.95  | -1.31 | 0.52 | 9.48E-04 | 1.27E-02 |
| MEF2D     | 7386.18   | -1.31 | 0.30 | 1.40E-06 | 1.05E-04 |
| L3MBTL4   | 585.53    | -1.31 | 0.74 | 4.98E-03 | 4.00E-02 |
| COLCA2    | 454.92    | -1.31 | 0.77 | 5.57E-03 | 4.31E-02 |
| TMEM25    | 1538.73   | -1.32 | 0.47 | 4.72E-04 | 7.77E-03 |
| TBX2      | 8374.16   | -1.32 | 0.72 | 4.70E-03 | 3.85E-02 |
| NPR1      | 5891.75   | -1.32 | 0.92 | 8.36E-03 | 5.66E-02 |
| GPRC5A    | 9147.55   | -1.32 | 0.83 | 6.69E-03 | 4.88E-02 |
| PALM2     | 232.72    | -1.33 | 0.81 | 6.25E-03 | 4.66E-02 |
| ZNF141    | 1192.75   | -1.33 | 0.50 | 7.24E-04 | 1.05E-02 |
| EGR3      | 996.30    | -1.33 | 0.67 | 3.37E-03 | 3.04E-02 |
| LIMS2     | 6173.59   | -1.33 | 0.48 | 5.28E-04 | 8.36E-03 |
| SYNPO2    | 7927.81   | -1.33 | 0.60 | 1.97E-03 | 2.11E-02 |
| NNMT      | 29475.13  | -1.34 | 0.45 | 3.19E-04 | 5.92E-03 |
| TMC7      | 248.00    | -1.34 | 1.16 | 1.05E-02 | 6.56E-02 |
| CASP9     | 1501.82   | -1.34 | 0.34 | 7.93E-06 | 3.89E-04 |
| CAT       | 13847.76  | -1.34 | 0.21 | 1.25E-11 | 6.40E-09 |
| CECR2     | 30.13     | -1.35 | 1.35 | 1.10E-02 | 6.74E-02 |
| INAFM2    | 1428.10   | -1.35 | 0.71 | 3.94E-03 | 3.41E-02 |
| RBKS      | 1062.77   | -1.36 | 0.98 | 8.35E-03 | 5.66E-02 |
| PPP1R12C  | 3886.28   | -1.36 | 0.33 | 3.71E-06 | 2.21E-04 |
| FLNA      | 126394.79 | -1.36 | 0.30 | 3.47E-07 | 3.56E-05 |
| RYR2      | 691.81    | -1.36 | 0.55 | 1.12E-03 | 1.42E-02 |
| TLE2      | 2073.87   | -1.37 | 0.47 | 2.99E-04 | 5.65E-03 |
| PDE5A     | 6067.86   | -1.38 | 0.63 | 2.24E-03 | 2.31E-02 |
| MAP3K8    | 4977.76   | -1.38 | 0.86 | 6.38E-03 | 4.72E-02 |
| RND3      | 13010.46  | -1.38 | 0.43 | 1.17E-04 | 2.80E-03 |
| RASL12    | 7997.22   | -1.39 | 0.53 | 7.56E-04 | 1.07E-02 |
| ATOH8     | 1787.75   | -1.39 | 0.54 | 8.27E-04 | 1.14E-02 |
| CRYAB     | 14762.11  | -1.39 | 0.49 | 3.60E-04 | 6.46E-03 |
| SOX5      | 1446.14   | -1.39 | 0.47 | 2.58E-04 | 5.11E-03 |
| GP1BB     | 1276.58   | -1.39 | 0.42 | 7.79E-05 | 2.11E-03 |
| MOB3C     | 2896.61   | -1.40 | 0.28 | 9.08E-08 | 1.18E-05 |
| GADD45G   | 3704.91   | -1.40 | 0.68 | 2.77E-03 | 2.66E-02 |
| DSTN      | 67797.49  | -1.40 | 0.40 | 4.38E-05 | 1.38E-03 |
| ARHGEF10L | 7544.51   | -1.41 | 0.46 | 2.10E-04 | 4.39E-03 |
| ANGPTL7   | 1352.09   | -1.41 | 1.41 | 1.10E-02 | 6.76E-02 |
| RDH10     | 3707.21   | -1.41 | 0.92 | 7.01E-03 | 5.04E-02 |
| DCUN1D3   | 3356.98   | -1.41 | 0.19 | 1.19E-14 | 1.53E-11 |
| PIPSK1B   | 467.78    | -1.41 | 1.47 | 1.12E-02 | 6.84E-02 |
| TMEM51    | 2193.47   | -1.41 | 0.85 | 5.61E-03 | 4.32E-02 |
| SLC4A11   | 192.05    | -1.42 | 0.64 | 2.04E-03 | 2.17E-02 |
| EIF4A3    | 15312.17  | -1.43 | 0.55 | 8.13E-04 | 1.13E-02 |
| BMP2      | 4277.89   | -1.43 | 0.68 | 2.61E-03 | 2.58E-02 |
| SLC25A18  | 469.70    | -1.43 | 0.76 | 3.97E-03 | 3.42E-02 |
| CCDC107   | 4213.59   | -1.43 | 0.33 | 1.65E-06 | 1.20E-04 |
| ITGA7     | 2891.64   | -1.43 | 0.82 | 4.95E-03 | 3.98E-02 |
| PIM1      | 5777.02   | -1.43 | 0.71 | 3.03E-03 | 2.83E-02 |
| THRA      | 4582.33   | -1.44 | 0.53 | 5.64E-04 | 8.77E-03 |
| SORL1     | 2252.97   | -1.44 | 1.86 | 1.16E-02 | 6.98E-02 |
| GPC4      | 4144.91   | -1.44 | 0.59 | 1.12E-03 | 1.42E-02 |
| KLF11     | 6269.07   | -1.44 | 0.39 | 1.91E-05 | 7.38E-04 |
| CPED1     | 7181.07   | -1.45 | 0.44 | 1.09E-04 | 2.67E-03 |
| OLAH      | 48.45     | -1.45 | 1.04 | 7.73E-03 | 5.41E-02 |
| ARVCF     | 2018.24   | -1.45 | 0.63 | 1.66E-03 | 1.87E-02 |
| GPD1L     | 2697.07   | -1.45 | 0.37 | 9.78E-06 | 4.53E-04 |
| CRIP2     | 25336.87  | -1.45 | 0.54 | 5.77E-04 | 8.94E-03 |
| NR3C2     | 551.01    | -1.45 | 0.52 | 4.38E-04 | 7.36E-03 |
| LTBP4     | 71836.00  | -1.45 | 0.93 | 6.35E-03 | 4.71E-02 |
| KLHL38    | 96.84     | -1.46 | 1.46 | 1.06E-02 | 6.57E-02 |
| BCL6      | 4956.38   | -1.46 | 0.44 | 8.83E-05 | 2.28E-03 |
| ADCY3     | 11434.48  | -1.46 | 0.25 | 3.38E-10 | 9.78E-08 |
| SLC16A8   | 130.60    | -1.46 | 0.57 | 8.42E-04 | 1.16E-02 |
| BHLHE40   | 15948.64  | -1.46 | 0.50 | 3.27E-04 | 6.02E-03 |
| S1PR3     | 7404.57   | -1.46 | 0.30 | 1.74E-07 | 2.09E-05 |
| HSPB7     | 3414.04   | -1.46 | 0.71 | 2.66E-03 | 2.61E-02 |
| GTF2B     | 4144.86   | -1.47 | 0.34 | 2.09E-06 | 1.41E-04 |
| RADIL     | 1223.69   | -1.47 | 0.64 | 1.65E-03 | 1.86E-02 |
| FADS3     | 5443.38   | -1.47 | 0.50 | 2.62E-04 | 5.17E-03 |
| RCAN1     | 10838.51  | -1.47 | 0.63 | 1.53E-03 | 1.77E-02 |
| ASPA      | 1490.05   | -1.47 | 0.41 | 3.43E-05 | 1.15E-03 |
| CYCS      | 17812.37  | -1.48 | 0.82 | 4.29E-03 | 3.60E-02 |
| CDHR3     | 201.27    | -1.48 | 0.35 | 2.28E-06 | 1.50E-04 |
| FOSB      | 30794.83  | -1.48 | 0.57 | 7.89E-04 | 1.10E-02 |
| TGFBR3    | 16366.17  | -1.48 | 0.91 | 5.70E-03 | 4.37E-02 |
| COL11A2   | 112.06    | -1.49 | 0.81 | 4.08E-03 | 3.49E-02 |
| LG4       | 2782.60   | -1.49 | 0.80 | 3.84E-03 | 3.34E-02 |
| CSR2      | 6864.32   | -1.49 | 0.71 | 2.50E-03 | 2.51E-02 |
| ANGPT1    | 3990.53   | -1.49 | 0.42 | 3.88E-05 | 1.26E-03 |
| TMEM38B   | 2777.46   | -1.49 | 0.42 | 3.58E-05 | 1.19E-03 |
| TRIM72    | 117.91    | -1.49 | 0.65 | 1.53E-03 | 1.77E-02 |
| NFKBIZ    | 24860.98  | -1.50 | 0.66 | 1.64E-03 | 1.85E-02 |
| TMCC2     | 373.68    | -1.50 | 0.40 | 1.52E-05 | 6.17E-04 |
| MYLK      | 25991.39  | -1.50 | 0.64 | 1.40E-03 | 1.65E-02 |
| GRTP1     | 299.96    | -1.50 | 0.74 | 2.79E-03 | 2.67E-02 |
| CBX7      | 3798.65   | -1.50 | 0.63 | 1.28E-03 | 1.57E-02 |
| CARNS1    | 400.12    | -1.50 | 1.12 | 7.98E-03 | 5.51E-02 |
| BVES      | 508.75    | -1.51 | 0.55 | 5.02E-04 | 8.08E-03 |
| MAP3K20   | 15079.18  | -1.51 | 0.37 | 4.40E-06 | 2.50E-04 |
| TACC1     | 23435.29  | -1.51 | 0.22 | 3.73E-13 | 3.46E-10 |
| BMP8B     | 208.68    | -1.51 | 1.47 | 1.01E-02 | 6.39E-02 |
| CD9       | 27230.32  | -1.51 | 0.48 | 1.39E-04 | 3.19E-03 |

|                |           |       |      |          |          |
|----------------|-----------|-------|------|----------|----------|
| FOS            | 409588.11 | -1.52 | 0.53 | 3.63E-04 | 6.50E-03 |
| SERTAD3        | 3735.00   | -1.52 | 0.33 | 3.10E-07 | 3.41E-05 |
| TP63INP2       | 3125.79   | -1.52 | 0.42 | 3.24E-05 | 1.11E-03 |
| TCAP           | 19.01     | -1.52 | 1.20 | 8.27E-03 | 5.64E-02 |
| ACTA2          | 220958.22 | -1.53 | 0.75 | 2.70E-03 | 2.63E-02 |
| OLFML2A        | 3309.29   | -1.54 | 0.48 | 1.25E-04 | 2.92E-03 |
| B4GALNT1       | 1137.58   | -1.54 | 0.57 | 5.97E-04 | 9.06E-03 |
| ARHGEF39       | 693.80    | -1.54 | 0.72 | 2.19E-03 | 2.27E-02 |
| FGF1           | 703.49    | -1.54 | 0.55 | 3.97E-04 | 6.91E-03 |
| KLHDC9         | 195.51    | -1.54 | 0.59 | 6.89E-04 | 1.01E-02 |
| ABLIM1         | 12104.34  | -1.54 | 0.85 | 4.25E-03 | 3.58E-02 |
| GATM           | 1247.22   | -1.54 | 1.06 | 6.99E-03 | 5.03E-02 |
| SYDE2          | 863.29    | -1.54 | 0.71 | 2.01E-03 | 2.14E-02 |
| DNAJB1         | 66556.33  | -1.54 | 0.66 | 1.40E-03 | 1.65E-02 |
| CNGA3          | 19.90     | -1.54 | 1.82 | 1.03E-02 | 6.48E-02 |
| SPRYD3         | 9574.20   | -1.55 | 0.31 | 5.24E-08 | 7.52E-06 |
| ARL5B          | 5095.94   | -1.55 | 0.46 | 6.33E-05 | 1.83E-03 |
| ZFH3           | 4629.71   | -1.55 | 0.34 | 5.34E-07 | 4.76E-05 |
| ADGRL3         | 1033.50   | -1.56 | 1.03 | 6.43E-03 | 4.75E-02 |
| CCNL1          | 18483.33  | -1.56 | 0.45 | 4.24E-05 | 1.35E-03 |
| KLHL23         | 2368.78   | -1.56 | 0.80 | 3.23E-03 | 2.95E-02 |
| PPFIA2         | 532.11    | -1.56 | 0.59 | 6.23E-04 | 9.32E-03 |
| SLC2A3         | 14786.98  | -1.56 | 0.69 | 1.60E-03 | 1.82E-02 |
| CSF1           | 21122.51  | -1.57 | 0.50 | 1.40E-04 | 3.20E-03 |
| CCNH           | 6071.03   | -1.57 | 0.57 | 4.88E-04 | 7.94E-03 |
| LAMA5          | 9787.06   | -1.57 | 0.73 | 2.09E-03 | 2.20E-02 |
| MTHFD2         | 4733.55   | -1.58 | 0.47 | 7.78E-05 | 2.11E-03 |
| EGFLAM         | 3037.51   | -1.58 | 0.52 | 2.21E-04 | 4.52E-03 |
| NOTCH3         | 62927.07  | -1.58 | 0.60 | 6.77E-04 | 1.00E-02 |
| NT5C1A         | 45.26     | -1.58 | 2.45 | 1.04E-02 | 6.53E-02 |
| PDK4           | 102881.26 | -1.58 | 1.35 | 1.04E-02 | 6.52E-02 |
| SVEP1          | 13163.67  | -1.59 | 1.02 | 6.15E-03 | 4.61E-02 |
| ATP8B4         | 888.81    | -1.59 | 0.73 | 2.03E-03 | 2.16E-02 |
| HEY2           | 2566.85   | -1.59 | 0.76 | 2.35E-03 | 2.39E-02 |
| SNN            | 2295.26   | -1.59 | 0.39 | 3.88E-06 | 2.29E-04 |
| PM20D2         | 2686.68   | -1.60 | 0.69 | 1.39E-03 | 1.65E-02 |
| TMC4           | 585.77    | -1.60 | 0.66 | 1.12E-03 | 1.42E-02 |
| TOB2           | 14322.06  | -1.60 | 0.36 | 8.35E-07 | 6.98E-05 |
| TPM2           | 58065.49  | -1.60 | 0.53 | 2.24E-04 | 4.57E-03 |
| KCNA2          | 71.17     | -1.60 | 2.82 | 1.05E-02 | 6.56E-02 |
| ITIH4          | 568.35    | -1.60 | 0.94 | 4.73E-03 | 3.87E-02 |
| SLC39A14       | 14888.45  | -1.60 | 0.52 | 1.70E-04 | 3.75E-03 |
| C8orf34        | 80.98     | -1.60 | 0.42 | 1.06E-05 | 4.79E-04 |
| JAG1           | 16700.91  | -1.61 | 0.36 | 7.14E-07 | 6.18E-05 |
| KLF10          | 23215.25  | -1.61 | 0.41 | 7.73E-06 | 3.81E-04 |
| JUND           | 85501.80  | -1.61 | 0.42 | 1.11E-05 | 4.93E-04 |
| ADPRH          | 1522.47   | -1.61 | 0.35 | 4.36E-07 | 4.23E-05 |
| SULT1C4        | 263.36    | -1.62 | 0.76 | 2.16E-03 | 2.25E-02 |
| ICOSLG         | 311.93    | -1.62 | 0.87 | 3.60E-03 | 3.18E-02 |
| TIPARP         | 6521.91   | -1.62 | 0.45 | 3.16E-05 | 1.10E-03 |
| LONRF2         | 771.92    | -1.63 | 0.39 | 3.25E-06 | 1.98E-04 |
| LDLR           | 2948.57   | -1.63 | 0.47 | 5.22E-05 | 1.57E-03 |
| JAKMIP2        | 52.02     | -1.63 | 0.83 | 2.94E-03 | 2.77E-02 |
| SUN2           | 13744.92  | -1.64 | 0.27 | 1.48E-10 | 4.84E-08 |
| PAR6A          | 304.37    | -1.64 | 0.91 | 4.03E-03 | 3.46E-02 |
| KRT222         | 631.27    | -1.64 | 1.53 | 9.26E-03 | 6.06E-02 |
| SPEG           | 3451.19   | -1.64 | 0.80 | 2.53E-03 | 2.53E-02 |
| MIDN           | 3559.55   | -1.64 | 0.41 | 5.05E-06 | 2.75E-04 |
| SNTA1          | 5291.33   | -1.65 | 0.56 | 2.53E-04 | 5.02E-03 |
| LONRF3         | 349.49    | -1.65 | 0.43 | 1.15E-05 | 5.00E-04 |
| LITAF          | 11616.17  | -1.65 | 0.57 | 2.96E-04 | 5.61E-03 |
| SYP            | 306.67    | -1.66 | 0.70 | 1.21E-03 | 1.50E-02 |
| PNRC1          | 67469.96  | -1.66 | 0.45 | 2.16E-05 | 8.04E-04 |
| TNS1           | 28250.23  | -1.66 | 0.46 | 2.91E-05 | 1.02E-03 |
| SLC25A21       | 72.62     | -1.66 | 0.69 | 1.14E-03 | 1.44E-02 |
| THBD           | 5998.46   | -1.66 | 0.79 | 2.35E-03 | 2.39E-02 |
| YBX3           | 34512.92  | -1.67 | 0.20 | 2.51E-18 | 9.61E-15 |
| WFS1           | 5060.97   | -1.67 | 0.43 | 9.93E-06 | 4.55E-04 |
| TRIM7          | 254.94    | -1.67 | 0.62 | 4.99E-04 | 8.06E-03 |
| MT1F           | 547.39    | -1.68 | 0.47 | 3.28E-05 | 1.11E-03 |
| ITPRIP         | 8547.82   | -1.68 | 0.56 | 2.15E-04 | 4.44E-03 |
| USP53          | 5032.66   | -1.68 | 0.52 | 1.03E-04 | 2.58E-03 |
| SPTB           | 353.68    | -1.69 | 0.86 | 2.97E-03 | 2.79E-02 |
| CBFAZT3        | 1198.22   | -1.69 | 1.00 | 4.85E-03 | 3.94E-02 |
| TMTC1          | 4242.92   | -1.69 | 0.36 | 3.10E-07 | 3.41E-05 |
| CNKSR1         | 45.01     | -1.69 | 0.65 | 6.38E-04 | 9.52E-03 |
| CEBPB          | 25129.08  | -1.69 | 0.44 | 1.02E-05 | 4.61E-04 |
| CITED4         | 1785.20   | -1.69 | 0.58 | 2.73E-04 | 5.32E-03 |
| MPPED2         | 417.24    | -1.70 | 1.19 | 6.60E-03 | 4.84E-02 |
| IER2           | 53583.29  | -1.71 | 0.53 | 1.08E-04 | 2.66E-03 |
| ASB16          | 86.99     | -1.71 | 1.05 | 5.07E-03 | 4.06E-02 |
| KLF9           | 4517.95   | -1.71 | 0.52 | 7.84E-05 | 2.12E-03 |
| TMPRSS9        | 34.57     | -1.72 | 0.95 | 3.78E-03 | 3.31E-02 |
| TINAGL1        | 31834.95  | -1.72 | 1.01 | 4.61E-03 | 3.80E-02 |
| CSPG4          | 10237.86  | -1.72 | 0.53 | 9.94E-05 | 2.51E-03 |
| MT1G           | 439.18    | -1.72 | 1.34 | 7.65E-03 | 5.37E-02 |
| SLC25A4        | 5465.67   | -1.72 | 0.41 | 2.04E-06 | 1.39E-04 |
| EBF3           | 763.17    | -1.72 | 0.85 | 2.67E-03 | 2.62E-02 |
| RGS7BP         | 931.89    | -1.72 | 1.08 | 5.37E-03 | 4.22E-02 |
| CORO6          | 1963.31   | -1.72 | 0.70 | 9.55E-04 | 1.27E-02 |
| NPNT           | 10286.47  | -1.72 | 0.93 | 3.60E-03 | 3.18E-02 |
| SPATA25        | 16.52     | -1.73 | 0.74 | 1.13E-03 | 1.43E-02 |
| RBPMS          | 12962.34  | -1.74 | 0.41 | 2.15E-06 | 1.43E-04 |
| INPP5A         | 7012.49   | -1.75 | 0.49 | 3.20E-05 | 1.11E-03 |
| PPM1L          | 1440.10   | -1.75 | 0.70 | 8.66E-04 | 1.18E-02 |
| WFDC1          | 2675.81   | -1.76 | 1.02 | 4.45E-03 | 3.71E-02 |
| FOX1           | 485.89    | -1.77 | 0.91 | 2.98E-03 | 2.79E-02 |
| SMIM10L2A      | 105.13    | -1.77 | 0.51 | 4.07E-05 | 1.31E-03 |
| LIPH           | 37.49     | -1.77 | 0.93 | 3.16E-03 | 2.90E-02 |
| IL6R           | 1787.83   | -1.78 | 0.61 | 2.73E-04 | 5.32E-03 |
| TMEM110-MUSTN1 | 1653.51   | -1.78 | 0.53 | 6.23E-05 | 1.80E-03 |
| MAOA           | 2297.12   | -1.78 | 0.61 | 2.68E-04 | 5.25E-03 |

|           |           |       |      |          |          |
|-----------|-----------|-------|------|----------|----------|
| SOX13     | 2659.43   | -1.78 | 0.39 | 5.07E-07 | 4.60E-05 |
| RASGRP2   | 1515.11   | -1.79 | 0.94 | 3.14E-03 | 2.90E-02 |
| FNDC11    | 28.11     | -1.79 | 1.76 | 8.77E-03 | 5.85E-02 |
| NIPAL1    | 104.33    | -1.80 | 1.14 | 5.30E-03 | 4.18E-02 |
| MOB2      | 3924.94   | -1.80 | 0.45 | 5.91E-06 | 3.05E-04 |
| CMKLR1    | 2372.37   | -1.80 | 0.45 | 6.44E-06 | 3.29E-04 |
| MAT2A     | 24016.81  | -1.80 | 0.27 | 1.08E-12 | 8.69E-10 |
| ADAMTSL2  | 358.67    | -1.81 | 0.72 | 8.13E-04 | 1.13E-02 |
| MAFK      | 649.49    | -1.81 | 0.43 | 2.62E-06 | 1.67E-04 |
| KLKB1     | 25.73     | -1.82 | 0.81 | 1.49E-03 | 1.74E-02 |
| ZSWIM5    | 224.69    | -1.82 | 0.88 | 2.29E-03 | 2.35E-02 |
| SERTM1    | 664.42    | -1.82 | 0.75 | 1.04E-03 | 1.36E-02 |
| NMUR1     | 94.70     | -1.82 | 0.68 | 5.32E-04 | 8.41E-03 |
| PPM1E     | 20.40     | -1.83 | 1.11 | 4.70E-03 | 3.85E-02 |
| HACD1     | 982.07    | -1.84 | 0.74 | 9.22E-04 | 1.24E-02 |
| PPP1R12B  | 14371.79  | -1.84 | 0.72 | 7.87E-04 | 1.10E-02 |
| PTH2R     | 490.21    | -1.84 | 1.49 | 7.67E-03 | 5.38E-02 |
| STOX1     | 139.34    | -1.84 | 1.00 | 3.45E-03 | 3.08E-02 |
| ZBTB21    | 3008.85   | -1.85 | 0.37 | 7.88E-08 | 1.04E-05 |
| RHOB      | 20561.48  | -1.85 | 0.53 | 3.91E-05 | 1.27E-03 |
| NUDT4     | 25519.19  | -1.85 | 0.49 | 1.39E-05 | 5.81E-04 |
| TIMP3     | 192626.55 | -1.86 | 0.40 | 2.88E-07 | 3.24E-05 |
| NTN4      | 9137.09   | -1.86 | 0.72 | 7.31E-04 | 1.05E-02 |
| DGKG      | 1050.63   | -1.87 | 1.01 | 3.46E-03 | 3.09E-02 |
| ABCC2     | 391.87    | -1.87 | 0.95 | 2.74E-03 | 2.65E-02 |
| BAG3      | 15542.97  | -1.87 | 0.33 | 1.07E-09 | 2.74E-07 |
| KHK       | 523.21    | -1.87 | 0.64 | 2.63E-04 | 5.17E-03 |
| KLHL26    | 993.51    | -1.87 | 0.40 | 2.85E-07 | 3.24E-05 |
| TMEM56    | 662.78    | -1.87 | 0.57 | 8.51E-05 | 2.22E-03 |
| CAP2      | 4142.98   | -1.88 | 0.73 | 6.93E-04 | 1.02E-02 |
| GLUL      | 65736.96  | -1.88 | 0.56 | 6.48E-05 | 1.86E-03 |
| LEFTY2    | 1381.96   | -1.88 | 1.36 | 6.60E-03 | 4.84E-02 |
| PTGES3L   | 128.28    | -1.88 | 0.57 | 7.50E-05 | 2.06E-03 |
| ELL2      | 6820.28   | -1.89 | 0.62 | 1.71E-04 | 3.76E-03 |
| PDE2A     | 2073.66   | -1.89 | 1.62 | 8.16E-03 | 5.60E-02 |
| MYL9      | 39536.88  | -1.89 | 0.45 | 2.53E-06 | 1.64E-04 |
| PYGM      | 2182.13   | -1.90 | 0.72 | 5.79E-04 | 8.94E-03 |
| ADCYAP1R1 | 394.73    | -1.90 | 0.87 | 1.81E-03 | 1.99E-02 |
| GSN       | 396161.88 | -1.90 | 0.55 | 4.34E-05 | 1.36E-03 |
| CRIM1     | 4510.05   | -1.90 | 0.48 | 7.52E-06 | 3.73E-04 |
| AOC3      | 28855.17  | -1.91 | 0.54 | 3.62E-05 | 1.19E-03 |
| PXDNL     | 834.36    | -1.91 | 1.58 | 7.66E-03 | 5.37E-02 |
| KANK1     | 6742.90   | -1.91 | 0.24 | 1.07E-16 | 1.64E-13 |
| CSRP1     | 46905.03  | -1.91 | 0.44 | 1.34E-06 | 1.02E-04 |
| BEND7     | 503.00    | -1.92 | 0.40 | 1.46E-07 | 1.78E-05 |
| MCAM      | 37592.16  | -1.92 | 0.94 | 2.41E-03 | 2.44E-02 |
| ADAMTSL4  | 10416.63  | -1.93 | 0.67 | 2.97E-04 | 5.63E-03 |
| FHL5      | 5585.53   | -1.93 | 0.98 | 2.79E-03 | 2.68E-02 |
| GABRD     | 385.94    | -1.93 | 1.29 | 5.69E-03 | 4.37E-02 |
| SPRY2     | 9205.87   | -1.94 | 0.43 | 4.41E-07 | 4.25E-05 |
| CYP4X1    | 1103.60   | -1.94 | 0.99 | 2.81E-03 | 2.69E-02 |
| PRMT9     | 2973.07   | -1.95 | 0.57 | 4.64E-05 | 1.44E-03 |
| PROSER2   | 461.33    | -1.96 | 0.32 | 5.70E-11 | 2.08E-08 |
| SMOG1     | 41.82     | -1.96 | 1.93 | 8.25E-03 | 5.64E-02 |
| SLC25A25  | 3601.98   | -1.96 | 0.40 | 1.07E-07 | 1.38E-05 |
| GLDN      | 1193.03   | -1.96 | 1.12 | 3.98E-03 | 3.43E-02 |
| MB        | 70.79     | -1.96 | 0.89 | 1.64E-03 | 1.86E-02 |
| WTIP      | 2358.42   | -1.96 | 0.58 | 5.76E-05 | 1.70E-03 |
| ADAMTSL3  | 3876.07   | -1.97 | 0.71 | 3.92E-04 | 6.85E-03 |
| NTRK3     | 2153.08   | -1.97 | 0.72 | 4.26E-04 | 7.23E-03 |
| HEYL      | 8735.46   | -1.97 | 0.46 | 1.46E-06 | 1.08E-04 |
| CTNNA3    | 294.01    | -1.97 | 1.06 | 3.25E-03 | 2.96E-02 |
| ATP1B2    | 2836.55   | -1.97 | 0.91 | 1.82E-03 | 1.99E-02 |
| RPS6KL1   | 88.00     | -1.98 | 0.74 | 5.39E-04 | 8.47E-03 |
| NTRK2     | 19937.30  | -1.98 | 1.02 | 2.98E-03 | 2.79E-02 |
| TIMP4     | 681.90    | -1.98 | 0.28 | 2.80E-13 | 2.86E-10 |
| ADRA1A    | 289.45    | -1.98 | 1.13 | 3.87E-03 | 3.36E-02 |
| NET1      | 18447.82  | -1.98 | 0.60 | 8.27E-05 | 2.19E-03 |
| TRIM36    | 105.32    | -1.99 | 1.34 | 5.66E-03 | 4.35E-02 |
| PROB1     | 374.58    | -1.99 | 0.47 | 2.02E-06 | 1.39E-04 |
| KCNT1     | 140.83    | -1.99 | 1.31 | 5.43E-03 | 4.25E-02 |
| OXC2      | 82.93     | -2.00 | 0.63 | 1.10E-04 | 2.69E-03 |
| NTRK1     | 303.02    | -2.01 | 0.86 | 1.23E-03 | 1.52E-02 |
| CHST7     | 1944.84   | -2.01 | 0.92 | 1.77E-03 | 1.96E-02 |
| FMO2      | 5068.50   | -2.01 | 0.84 | 1.12E-03 | 1.42E-02 |
| HES6      | 517.38    | -2.02 | 0.71 | 3.13E-04 | 5.85E-03 |
| NAP1L2    | 102.56    | -2.02 | 1.05 | 2.88E-03 | 2.73E-02 |
| ITGA3     | 2593.62   | -2.03 | 0.75 | 5.17E-04 | 8.21E-03 |
| OR51E2    | 473.70    | -2.03 | 1.28 | 4.92E-03 | 3.97E-02 |
| ZC3H12A   | 3209.63   | -2.03 | 0.59 | 4.24E-05 | 1.35E-03 |
| PIGA      | 1426.44   | -2.04 | 0.58 | 3.59E-05 | 1.19E-03 |
| ANGPT4    | 2369.25   | -2.05 | 1.79 | 7.75E-03 | 5.41E-02 |
| SLC2A4    | 289.85    | -2.06 | 0.84 | 9.60E-04 | 1.27E-02 |
| FSTL4     | 17.97     | -2.06 | 1.12 | 3.08E-03 | 2.86E-02 |
| PLD5      | 74.77     | -2.06 | 2.62 | 8.63E-03 | 5.80E-02 |
| ITPRIPL1  | 447.69    | -2.06 | 0.90 | 1.35E-03 | 1.62E-02 |
| ITPK1     | 4686.87   | -2.07 | 0.50 | 2.78E-06 | 1.75E-04 |
| GSTT2     | 23.75     | -2.07 | 0.85 | 9.00E-04 | 1.22E-02 |
| TSPAN19   | 8.53      | -2.08 | 0.92 | 1.31E-03 | 1.58E-02 |
| CFAP74    | 120.59    | -2.10 | 0.88 | 1.10E-03 | 1.41E-02 |
| SEMA3E    | 441.22    | -2.10 | 0.92 | 1.36E-03 | 1.64E-02 |
| AFOD      | 53307.12  | -2.10 | 1.18 | 3.66E-03 | 3.23E-02 |
| SCN3A     | 627.50    | -2.11 | 2.16 | 8.28E-03 | 5.64E-02 |
| CAND2     | 1326.64   | -2.11 | 0.59 | 2.71E-05 | 9.68E-04 |
| NFASC     | 3550.77   | -2.13 | 0.64 | 6.92E-05 | 1.96E-03 |
| MT1E      | 10335.16  | -2.14 | 0.54 | 6.72E-06 | 3.39E-04 |
| CHST8     | 148.64    | -2.14 | 1.64 | 6.56E-03 | 4.83E-02 |
| ADIRF     | 29495.60  | -2.14 | 0.73 | 2.44E-04 | 4.89E-03 |
| FAM178B   | 99.57     | -2.14 | 0.75 | 3.11E-04 | 5.83E-03 |
| GNAZ      | 78.38     | -2.16 | 0.52 | 2.59E-06 | 1.66E-04 |
| CDC42EP4  | 8566.79   | -2.16 | 0.47 | 3.41E-07 | 3.56E-05 |
| MGLL      | 10791.98  | -2.18 | 0.74 | 2.43E-04 | 4.88E-03 |

|          |           |       |      |          |          |
|----------|-----------|-------|------|----------|----------|
| CABP1    | 295.51    | -2.18 | 1.04 | 1.99E-03 | 2.13E-02 |
| SCUBE3   | 455.05    | -2.19 | 0.68 | 1.01E-04 | 2.53E-03 |
| PTTG2    | 22.32     | -2.19 | 2.64 | 8.41E-03 | 5.69E-02 |
| ANGPTL5  | 795.92    | -2.20 | 1.58 | 6.01E-03 | 4.55E-02 |
| NKD1     | 710.28    | -2.20 | 0.79 | 3.85E-04 | 6.76E-03 |
| TAGLN    | 94742.85  | -2.20 | 0.63 | 4.21E-05 | 1.35E-03 |
| CNN1     | 15231.53  | -2.20 | 0.59 | 1.73E-05 | 6.83E-04 |
| ADCY1    | 653.09    | -2.21 | 0.81 | 4.45E-04 | 7.46E-03 |
| KIAA1671 | 2188.40   | -2.21 | 0.41 | 5.04E-09 | 1.12E-06 |
| SUSD5    | 4899.90   | -2.22 | 0.80 | 4.12E-04 | 7.08E-03 |
| CLMN     | 5914.40   | -2.22 | 0.74 | 2.18E-04 | 4.48E-03 |
| SNTB1    | 2352.50   | -2.22 | 0.37 | 1.72E-10 | 5.51E-08 |
| ACVR1C   | 55.73     | -2.23 | 0.95 | 1.11E-03 | 1.42E-02 |
| NOX4     | 1479.93   | -2.23 | 0.77 | 2.80E-04 | 5.39E-03 |
| BCAM     | 879.89    | -2.24 | 0.68 | 7.29E-05 | 2.03E-03 |
| WDR38    | 8.90      | -2.24 | 1.09 | 2.04E-03 | 2.16E-02 |
| CCDC69   | 2179.03   | -2.24 | 0.51 | 9.30E-07 | 7.47E-05 |
| SYPL2    | 555.99    | -2.25 | 0.59 | 1.12E-05 | 4.96E-04 |
| CYR61    | 92834.99  | -2.26 | 0.37 | 6.90E-11 | 2.46E-08 |
| LIFR     | 5233.03   | -2.26 | 0.45 | 4.69E-08 | 6.86E-06 |
| TRABD2B  | 465.10    | -2.27 | 0.59 | 9.96E-06 | 4.55E-04 |
| ADGRG2   | 1424.36   | -2.28 | 0.83 | 4.19E-04 | 7.17E-03 |
| SLC6A16  | 136.31    | -2.29 | 0.86 | 5.45E-04 | 8.54E-03 |
| NOL3     | 1990.13   | -2.29 | 0.55 | 2.91E-06 | 1.80E-04 |
| CCL8     | 1348.81   | -2.30 | 1.34 | 3.95E-03 | 3.41E-02 |
| SLPI     | 3288.11   | -2.30 | 1.06 | 1.79E-03 | 1.97E-02 |
| PPP1R15A | 61690.21  | -2.30 | 0.55 | 2.38E-06 | 1.56E-04 |
| ABTB2    | 732.86    | -2.31 | 0.77 | 2.11E-04 | 4.40E-03 |
| LBH      | 14797.85  | -2.31 | 0.66 | 3.56E-05 | 1.19E-03 |
| KBTBD13  | 67.52     | -2.32 | 1.20 | 2.73E-03 | 2.64E-02 |
| DBNDD1   | 191.75    | -2.33 | 0.95 | 8.83E-04 | 1.20E-02 |
| PTPA43   | 9623.31   | -2.33 | 0.79 | 2.43E-04 | 4.88E-03 |
| ZNF331   | 10289.15  | -2.33 | 0.70 | 6.81E-05 | 1.94E-03 |
| SORT1    | 5715.36   | -2.34 | 0.74 | 1.24E-04 | 2.90E-03 |
| DMPK     | 7520.88   | -2.34 | 0.64 | 2.17E-05 | 8.05E-04 |
| FABP4    | 6547.66   | -2.34 | 0.90 | 6.11E-04 | 9.19E-03 |
| RGL3     | 648.02    | -2.34 | 0.78 | 2.09E-04 | 4.38E-03 |
| SERPINI1 | 3764.76   | -2.35 | 0.73 | 9.82E-05 | 2.49E-03 |
| ACKR2    | 375.02    | -2.35 | 1.04 | 1.40E-03 | 1.66E-02 |
| CKMT2    | 856.21    | -2.35 | 1.05 | 1.49E-03 | 1.74E-02 |
| SGSM1    | 306.62    | -2.35 | 0.85 | 4.02E-04 | 6.96E-03 |
| NRIP2    | 2896.43   | -2.36 | 0.82 | 2.95E-04 | 5.61E-03 |
| ATF3     | 15031.33  | -2.36 | 0.72 | 8.04E-05 | 2.16E-03 |
| AGTR2    | 118.22    | -2.36 | 2.00 | 6.74E-03 | 4.91E-02 |
| HRC      | 1304.26   | -2.36 | 0.98 | 1.00E-03 | 1.32E-02 |
| AKAP1    | 5965.26   | -2.37 | 0.58 | 3.92E-06 | 2.30E-04 |
| MEF2B    | 684.42    | -2.37 | 0.89 | 5.33E-04 | 8.41E-03 |
| UAP1     | 25327.27  | -2.37 | 0.63 | 1.37E-05 | 5.74E-04 |
| ANKK1    | 6.65      | -2.38 | 1.42 | 4.10E-03 | 3.50E-02 |
| CCDC85A  | 630.19    | -2.39 | 0.56 | 1.82E-06 | 1.27E-04 |
| MYOM1    | 2627.71   | -2.39 | 0.72 | 6.98E-05 | 1.97E-03 |
| LDHC     | 21.19     | -2.40 | 1.40 | 3.70E-03 | 3.26E-02 |
| DNAJC6   | 275.18    | -2.40 | 0.70 | 5.24E-05 | 1.58E-03 |
| HUSTB    | 33.16     | -2.42 | 0.56 | 1.41E-06 | 1.05E-04 |
| MPP7     | 1302.80   | -2.43 | 0.71 | 5.11E-05 | 1.55E-03 |
| ADAMTS1  | 75681.91  | -2.43 | 0.42 | 6.78E-10 | 1.79E-07 |
| PER1     | 9349.85   | -2.44 | 0.96 | 7.59E-04 | 1.07E-02 |
| HOXD10   | 27.41     | -2.44 | 1.89 | 5.98E-03 | 4.53E-02 |
| MRGPRE   | 46.45     | -2.45 | 1.01 | 8.96E-04 | 1.22E-02 |
| TTPA     | 20.20     | -2.46 | 1.15 | 1.77E-03 | 1.96E-02 |
| PPP1R14A | 4728.26   | -2.46 | 0.81 | 1.87E-04 | 4.07E-03 |
| TMEM52   | 58.20     | -2.46 | 0.96 | 6.70E-04 | 9.94E-03 |
| SMCO3    | 34.58     | -2.47 | 0.46 | 9.47E-09 | 1.77E-06 |
| NPY5R    | 177.89    | -2.47 | 1.97 | 6.34E-03 | 4.71E-02 |
| RANBP3L  | 354.06    | -2.48 | 0.76 | 9.17E-05 | 2.34E-03 |
| ARTN     | 273.97    | -2.48 | 0.75 | 7.20E-05 | 2.01E-03 |
| LDB3     | 1325.68   | -2.49 | 0.93 | 5.13E-04 | 8.16E-03 |
| STUM     | 972.70    | -2.49 | 0.86 | 2.79E-04 | 5.39E-03 |
| RXRG     | 412.54    | -2.49 | 0.91 | 4.37E-04 | 7.36E-03 |
| COCH     | 509.32    | -2.50 | 0.50 | 5.07E-08 | 7.34E-06 |
| IGSF9B   | 146.87    | -2.50 | 0.79 | 1.22E-04 | 2.87E-03 |
| SRL      | 1060.84   | -2.51 | 1.05 | 1.07E-03 | 1.38E-02 |
| NTF3     | 809.30    | -2.52 | 1.19 | 1.92E-03 | 2.08E-02 |
| JUNB     | 210392.23 | -2.52 | 0.49 | 2.16E-08 | 3.64E-06 |
| ITPKC    | 5773.75   | -2.54 | 0.59 | 1.54E-06 | 1.13E-04 |
| ADGRG4   | 43.86     | -2.54 | 0.91 | 3.66E-04 | 6.53E-03 |
| ZBTB7C   | 2023.58   | -2.54 | 0.68 | 1.49E-05 | 6.09E-04 |
| DMTN     | 486.88    | -2.55 | 0.81 | 1.20E-04 | 2.85E-03 |
| ZFAND5   | 81654.16  | -2.55 | 0.71 | 2.60E-05 | 9.38E-04 |
| ADRA1D   | 318.11    | -2.55 | 0.83 | 1.56E-04 | 3.52E-03 |
| PHLDA2   | 3749.19   | -2.58 | 0.55 | 3.13E-07 | 3.41E-05 |
| SAA2     | 22.17     | -2.58 | 1.01 | 6.94E-04 | 1.02E-02 |
| KLF2     | 23929.39  | -2.58 | 0.70 | 2.08E-05 | 7.83E-04 |
| ADRA2A   | 9919.30   | -2.59 | 0.67 | 9.07E-06 | 4.27E-04 |
| APOLD1   | 29743.05  | -2.59 | 1.41 | 3.30E-03 | 3.00E-02 |
| PITX1    | 515.72    | -2.59 | 1.09 | 1.09E-03 | 1.40E-02 |
| SNGG     | 4553.70   | -2.59 | 0.89 | 2.59E-04 | 5.12E-03 |
| PERM1    | 121.51    | -2.59 | 0.99 | 5.74E-04 | 8.91E-03 |
| HES4     | 6570.96   | -2.60 | 0.65 | 5.42E-06 | 2.89E-04 |
| NPY1R    | 2722.04   | -2.60 | 0.93 | 3.80E-04 | 6.70E-03 |
| CACNA1H  | 3681.30   | -2.62 | 0.84 | 1.35E-04 | 3.11E-03 |
| HIF3A    | 265.73    | -2.62 | 0.65 | 4.46E-06 | 2.51E-04 |
| WSCD2    | 1026.28   | -2.64 | 0.78 | 5.58E-05 | 1.66E-03 |
| HS3ST2   | 357.03    | -2.65 | 0.94 | 3.58E-04 | 6.43E-03 |
| SFRP5    | 57.47     | -2.66 | 2.49 | 6.73E-03 | 4.90E-02 |
| CASQ2    | 8318.75   | -2.67 | 1.15 | 1.27E-03 | 1.55E-02 |
| CEBPD    | 68995.24  | -2.67 | 0.60 | 7.90E-07 | 6.69E-05 |
| NFIL3    | 13665.60  | -2.70 | 0.41 | 5.20E-12 | 3.19E-09 |
| GPR20    | 1270.39   | -2.70 | 1.07 | 7.46E-04 | 1.07E-02 |
| PLN      | 14149.90  | -2.70 | 1.00 | 4.84E-04 | 7.90E-03 |
| DPF3     | 168.17    | -2.71 | 0.62 | 1.26E-06 | 9.73E-05 |
| GRID2IP  | 8.05      | -2.71 | 1.96 | 4.96E-03 | 3.98E-02 |

|          |           |       |      |          |          |
|----------|-----------|-------|------|----------|----------|
| TSPAN8   | 698.21    | -2.71 | 1.04 | 6.24E-04 | 9.33E-03 |
| DNER     | 409.34    | -2.72 | 1.22 | 1.51E-03 | 1.76E-02 |
| MRAP2    | 340.40    | -2.72 | 1.15 | 1.07E-03 | 1.38E-02 |
| SERTAD1  | 3878.94   | -2.72 | 0.42 | 6.20E-12 | 3.66E-09 |
| ATP1A2   | 1991.00   | -2.73 | 0.98 | 3.79E-04 | 6.69E-03 |
| PPP1R9A  | 310.29    | -2.73 | 0.55 | 6.44E-08 | 8.98E-06 |
| SOCS3    | 60716.32  | -2.73 | 0.70 | 8.50E-06 | 4.07E-04 |
| DYNC111  | 1045.56   | -2.73 | 0.65 | 2.44E-06 | 1.59E-04 |
| TACR1    | 67.47     | -2.74 | 1.31 | 1.90E-03 | 2.07E-02 |
| JPH2     | 2145.41   | -2.74 | 0.66 | 3.35E-06 | 2.02E-04 |
| PDE4C    | 644.23    | -2.74 | 0.81 | 5.87E-05 | 1.72E-03 |
| RASD1    | 39517.58  | -2.75 | 1.29 | 1.89E-03 | 2.05E-02 |
| BRSK2    | 194.75    | -2.76 | 0.97 | 3.30E-04 | 6.06E-03 |
| ERRF1    | 17049.72  | -2.77 | 0.69 | 5.21E-06 | 2.79E-04 |
| RIMS3    | 345.33    | -2.78 | 0.85 | 9.04E-05 | 2.31E-03 |
| MYO3A    | 262.96    | -2.79 | 0.64 | 1.25E-06 | 9.68E-05 |
| LMOD1    | 12222.37  | -2.79 | 0.76 | 2.20E-05 | 8.14E-04 |
| IRF1     | 13852.23  | -2.79 | 0.61 | 5.32E-07 | 4.76E-05 |
| CSDC2    | 3067.68   | -2.79 | 0.84 | 7.36E-05 | 2.04E-03 |
| MAATS1   | 146.33    | -2.80 | 0.63 | 7.66E-07 | 6.53E-05 |
| KCNAB1   | 8391.14   | -2.81 | 0.41 | 5.20E-13 | 4.43E-10 |
| MYOZ1    | 642.58    | -2.83 | 1.04 | 4.56E-04 | 7.60E-03 |
| DRD1     | 636.98    | -2.84 | 2.99 | 6.98E-03 | 5.03E-02 |
| CASZ1    | 336.77    | -2.84 | 0.62 | 4.56E-07 | 4.35E-05 |
| EFHD1    | 14467.81  | -2.85 | 0.53 | 7.83E-09 | 1.56E-06 |
| KCNMB1   | 2571.63   | -2.86 | 0.84 | 5.73E-05 | 1.69E-03 |
| FOSL1    | 1434.34   | -2.87 | 0.81 | 3.21E-05 | 1.11E-03 |
| XIRP1    | 94.52     | -2.90 | 1.50 | 2.54E-03 | 2.54E-02 |
| DNAJC27  | 1923.83   | -2.90 | 0.47 | 5.18E-11 | 1.97E-08 |
| ASB2     | 779.75    | -2.91 | 0.77 | 1.37E-05 | 5.74E-04 |
| SLAIN1   | 327.17    | -2.92 | 0.84 | 3.95E-05 | 1.27E-03 |
| ANO3     | 140.21    | -2.98 | 2.12 | 5.08E-03 | 4.06E-02 |
| GREB1L   | 493.23    | -2.98 | 0.79 | 1.30E-05 | 5.52E-04 |
| FOXO2    | 2146.63   | -2.98 | 0.94 | 1.18E-04 | 2.80E-03 |
| EGR1     | 129789.44 | -2.99 | 0.55 | 5.52E-09 | 1.21E-06 |
| SORBS1   | 5982.13   | -2.99 | 0.60 | 6.03E-08 | 8.49E-06 |
| CX3CL1   | 3095.19   | -2.99 | 0.80 | 1.77E-05 | 6.96E-04 |
| MDGA2    | 31.52     | -2.99 | 1.12 | 5.01E-04 | 8.07E-03 |
| NRGN     | 872.11    | -3.00 | 0.78 | 9.92E-06 | 4.55E-04 |
| DACH2    | 104.45    | -3.01 | 2.45 | 5.78E-03 | 4.41E-02 |
| RBPMS2   | 3003.07   | -3.03 | 0.65 | 2.96E-07 | 3.32E-05 |
| HMGCLL1  | 451.76    | -3.04 | 0.75 | 4.05E-06 | 2.34E-04 |
| TC2N     | 2378.36   | -3.04 | 1.08 | 3.52E-04 | 6.37E-03 |
| MT2A     | 51186.83  | -3.05 | 0.55 | 2.63E-09 | 6.11E-07 |
| RERGL    | 8167.10   | -3.05 | 1.48 | 2.09E-03 | 2.20E-02 |
| PRDM16   | 823.52    | -3.06 | 1.11 | 4.09E-04 | 7.04E-03 |
| REEP1    | 1619.51   | -3.07 | 0.80 | 1.14E-05 | 5.00E-04 |
| SYT1     | 210.41    | -3.07 | 1.04 | 2.39E-04 | 4.82E-03 |
| ACTC1    | 1029.15   | -3.09 | 1.10 | 3.53E-04 | 6.38E-03 |
| AJAP1    | 605.11    | -3.10 | 0.72 | 1.78E-06 | 1.26E-04 |
| KCNO4    | 511.14    | -3.10 | 0.77 | 4.71E-06 | 2.59E-04 |
| CLDN4    | 346.36    | -3.12 | 1.00 | 1.47E-04 | 3.34E-03 |
| C2orf40  | 2657.32   | -3.12 | 0.88 | 3.26E-05 | 1.11E-03 |
| HAS1     | 9405.39   | -3.13 | 1.05 | 2.26E-04 | 4.60E-03 |
| ZFP36    | 286522.75 | -3.14 | 0.58 | 8.14E-09 | 1.58E-06 |
| ADAMTS8  | 508.83    | -3.14 | 0.77 | 3.72E-06 | 2.21E-04 |
| MYC      | 39997.88  | -3.15 | 0.49 | 1.46E-11 | 6.80E-09 |
| NMNAT2   | 951.73    | -3.15 | 0.83 | 1.20E-05 | 5.22E-04 |
| CCDC3    | 23450.44  | -3.16 | 0.97 | 9.31E-05 | 2.37E-03 |
| USP2     | 833.39    | -3.18 | 0.40 | 2.30E-16 | 3.21E-13 |
| KCNK3    | 1059.80   | -3.19 | 0.89 | 2.72E-05 | 9.68E-04 |
| KCNJ3    | 28.64     | -3.24 | 0.87 | 1.43E-05 | 5.89E-04 |
| ADCY5    | 2379.84   | -3.25 | 0.83 | 8.07E-06 | 3.94E-04 |
| TRPV1    | 1675.05   | -3.25 | 0.54 | 1.41E-10 | 4.69E-08 |
| AVPR1A   | 12789.85  | -3.28 | 0.95 | 4.91E-05 | 1.50E-03 |
| VIT      | 3772.03   | -3.29 | 1.42 | 1.24E-03 | 1.53E-02 |
| SYNM     | 2959.14   | -3.31 | 0.70 | 1.87E-07 | 2.22E-05 |
| SGCA     | 2434.82   | -3.32 | 1.04 | 1.13E-04 | 2.73E-03 |
| CPXM2    | 12394.15  | -3.33 | 0.75 | 9.27E-07 | 7.47E-05 |
| CSRN1P1  | 28760.89  | -3.33 | 0.66 | 4.12E-08 | 6.09E-06 |
| RRAD     | 8328.23   | -3.34 | 0.82 | 4.54E-06 | 2.52E-04 |
| SLC16A12 | 39.92     | -3.34 | 0.83 | 4.81E-06 | 2.63E-04 |
| DUSP8    | 2153.98   | -3.35 | 0.56 | 2.41E-10 | 7.54E-08 |
| KLHL30   | 417.94    | -3.37 | 0.78 | 1.42E-06 | 1.05E-04 |
| PCOLCE2  | 18545.93  | -3.37 | 0.86 | 7.61E-06 | 3.76E-04 |
| KLF15    | 226.44    | -3.38 | 0.81 | 2.98E-06 | 1.83E-04 |
| CDKN1A   | 88140.45  | -3.39 | 0.54 | 4.13E-11 | 1.71E-08 |
| KBTBD12  | 243.28    | -3.41 | 0.69 | 6.99E-08 | 9.33E-06 |
| GDA      | 58.74     | -3.41 | 1.02 | 6.76E-05 | 1.93E-03 |
| SBSPPON  | 2480.37   | -3.44 | 0.75 | 4.96E-07 | 4.56E-05 |
| ART3     | 197.91    | -3.45 | 0.75 | 3.62E-07 | 3.68E-05 |
| SCN4A    | 188.69    | -3.48 | 0.79 | 9.64E-07 | 7.66E-05 |
| ADRB1    | 192.26    | -3.49 | 1.68 | 1.91E-03 | 2.07E-02 |
| ACADL    | 402.43    | -3.50 | 1.15 | 1.88E-04 | 4.07E-03 |
| FRMD1    | 75.33     | -3.52 | 0.84 | 2.62E-06 | 1.67E-04 |
| MYOCD    | 1516.99   | -3.52 | 1.07 | 8.49E-05 | 2.22E-03 |
| EPHA5    | 195.49    | -3.54 | 1.17 | 2.00E-04 | 4.26E-03 |
| CELA2B   | 6.48      | -3.54 | 1.22 | 2.27E-04 | 4.61E-03 |
| MYH11    | 125221.98 | -3.57 | 1.00 | 3.25E-05 | 1.11E-03 |
| FAM189A2 | 667.46    | -3.60 | 0.81 | 8.37E-07 | 6.98E-05 |
| GADD45B  | 76038.31  | -3.60 | 0.59 | 1.03E-10 | 3.51E-08 |
| FOXO1    | 1679.56   | -3.62 | 0.61 | 3.87E-10 | 1.10E-07 |
| GPX3     | 80743.42  | -3.66 | 0.38 | 8.06E-23 | 1.24E-18 |
| RGR      | 10.13     | -3.70 | 0.99 | 1.59E-05 | 6.39E-04 |
| CCL21    | 1680.38   | -3.71 | 1.23 | 1.99E-04 | 4.25E-03 |
| ITIH3    | 1654.40   | -3.71 | 1.16 | 1.11E-04 | 2.70E-03 |
| SORBS2   | 27041.88  | -3.72 | 0.87 | 1.82E-06 | 1.27E-04 |
| RGS6     | 1419.02   | -3.72 | 0.95 | 8.27E-06 | 3.98E-04 |
| ENTPD3   | 4465.91   | -3.72 | 0.93 | 5.85E-06 | 3.03E-04 |
| DEFB1    | 179.48    | -3.74 | 1.62 | 1.21E-03 | 1.50E-02 |
| LGR6     | 1127.92   | -3.77 | 1.08 | 4.26E-05 | 1.35E-03 |
| PIK3C2G  | 122.02    | -3.77 | 1.77 | 1.67E-03 | 1.88E-02 |

|          |           |       |      |          |          |
|----------|-----------|-------|------|----------|----------|
| TMEM179  | 5.27      | -3.80 | 1.94 | 1.30E-03 | 1.58E-02 |
| TNNC1    | 72.53     | -3.86 | 0.99 | 8.74E-06 | 4.14E-04 |
| CCL2     | 39711.81  | -3.87 | 0.74 | 2.05E-08 | 3.50E-06 |
| EVX1     | 28.90     | -3.87 | 1.93 | 2.16E-03 | 2.25E-02 |
| BTC      | 184.75    | -3.89 | 0.81 | 1.44E-07 | 1.77E-05 |
| LRRC10B  | 1543.68   | -3.89 | 0.66 | 4.86E-10 | 1.36E-07 |
| RGS16    | 16091.86  | -3.93 | 0.83 | 2.43E-07 | 2.82E-05 |
| SPRR2E   | 104.17    | -3.95 | 1.47 | 4.85E-04 | 7.90E-03 |
| KCNA5    | 3751.26   | -3.98 | 1.06 | 1.78E-05 | 6.98E-04 |
| AQP7     | 414.25    | -3.98 | 0.85 | 3.11E-07 | 3.41E-05 |
| MYH14    | 112.53    | -4.03 | 1.25 | 1.02E-04 | 2.55E-03 |
| ABRA     | 105.73    | -4.04 | 1.14 | 3.73E-05 | 1.21E-03 |
| DKK1     | 2512.65   | -4.05 | 1.54 | 5.94E-04 | 9.06E-03 |
| C11orf53 | 84.71     | -4.08 | 2.33 | 2.98E-03 | 2.79E-02 |
| MT1X     | 19955.58  | -4.11 | 0.60 | 1.13E-12 | 8.69E-10 |
| LSMEM2   | 415.92    | -4.11 | 0.91 | 7.00E-07 | 6.10E-05 |
| MAFF     | 12734.51  | -4.13 | 0.82 | 6.71E-08 | 9.12E-06 |
| PCP4L1   | 260.80    | -4.13 | 1.55 | 5.28E-04 | 8.36E-03 |
| GPM6A    | 259.39    | -4.17 | 0.81 | 3.18E-08 | 5.02E-06 |
| ADRA2C   | 382.37    | -4.17 | 0.81 | 2.69E-08 | 4.34E-06 |
| ZBTB16   | 10941.97  | -4.32 | 0.99 | 1.38E-06 | 1.04E-04 |
| SERPINA3 | 1835.90   | -4.33 | 0.81 | 9.39E-09 | 1.77E-06 |
| BMP5     | 708.55    | -4.33 | 1.59 | 4.68E-04 | 7.73E-03 |
| HBG2     | 23.12     | -4.40 | 1.74 | 7.57E-04 | 1.07E-02 |
| NR4A1    | 117239.70 | -4.44 | 0.88 | 6.63E-08 | 9.12E-06 |
| SLC19A2  | 6993.39   | -4.45 | 0.51 | 2.42E-19 | 1.24E-15 |
| C11orf96 | 7724.62   | -4.46 | 0.53 | 9.89E-18 | 2.53E-14 |
| BTG2     | 91008.99  | -4.53 | 0.81 | 2.91E-09 | 6.66E-07 |
| RXFP2    | 32.94     | -4.54 | 1.33 | 4.46E-05 | 1.39E-03 |
| PRG4     | 9624.19   | -4.60 | 1.09 | 3.00E-06 | 1.84E-04 |
| RBM24    | 2364.05   | -4.61 | 0.81 | 1.79E-09 | 4.37E-07 |
| IL6      | 12258.25  | -4.80 | 0.92 | 2.59E-08 | 4.23E-06 |
| PGPEP1L  | 18.66     | -4.82 | 1.58 | 2.13E-04 | 4.42E-03 |
| MT1M     | 11638.78  | -4.83 | 0.55 | 1.49E-19 | 1.14E-15 |
| CCK      | 37.51     | -4.94 | 1.86 | 5.60E-04 | 8.73E-03 |
| OPCML    | 104.32    | -4.96 | 1.34 | 2.04E-05 | 7.78E-04 |
| LGR5     | 711.63    | -5.06 | 2.26 | 1.31E-03 | 1.59E-02 |
| MYOC     | 5581.10   | -5.21 | 1.33 | 1.09E-05 | 4.91E-04 |
| PPP1R1A  | 720.16    | -5.21 | 0.96 | 8.49E-09 | 1.63E-06 |
| PCDH10   | 528.39    | -5.33 | 0.76 | 3.83E-13 | 3.46E-10 |
| CSF3     | 180.04    | -5.39 | 1.23 | 1.41E-06 | 1.05E-04 |
| KLHL40   | 16.13     | -5.46 | 1.48 | 2.48E-05 | 9.06E-04 |
| PROM1    | 35.67     | -5.48 | 1.57 | 4.03E-05 | 1.30E-03 |
| CYP4B1   | 1217.57   | -5.59 | 1.09 | 4.13E-08 | 6.09E-06 |
| TFF3     | 408.71    | -5.69 | 1.57 | 3.22E-05 | 1.11E-03 |
| MT1A     | 9262.22   | -5.99 | 0.88 | 1.79E-12 | 1.31E-09 |
| ALKAL2   | 761.60    | -6.00 | 0.81 | 3.18E-14 | 3.76E-11 |
| GPR182   | 29.10     | -6.46 | 1.66 | 7.75E-06 | 3.81E-04 |
| NMRK2    | 27.61     | -6.71 | 1.67 | 7.36E-06 | 3.67E-04 |
| CAV3     | 128.75    | -6.89 | 1.55 | 1.11E-06 | 8.67E-05 |
| SLC6A17  | 16.66     | -7.16 | 1.80 | 4.32E-07 | 4.22E-05 |
| SAA1     | 202.90    | -7.77 | 1.41 | 6.51E-09 | 1.35E-06 |
